# Supplementary material for: Gold-catalysed cascade rearrangements of ynamide propargyl esters
Source: Royal Society of Chemistry journal article supplement (doi:10.1039/c3cc00273j), 2013-01-01
Supplement: c3cc00273j.pdf [file c3cc00273j.pdf]

# Gold-catalysed cascade rearrangements of ynamide propargyl esters

Stephen J. Heffernan, James M. Beddoes, Mary, F. Mahon and David R. Carbery\*

Department of Chemistry, University of Bath, Claverton Down, United Kingdom;  
Tel: +44 1225 386144; E-mail: d.carbery@bath.ac.uk

## Electronic Supplementary Information

Table of Contents

|                                                          |                |
|----------------------------------------------------------|----------------|
| <b>I. General Information</b>                            | <b>Page 2</b>  |
| <b>II. Experimental Data</b>                             | <b>Page 3</b>  |
| <b>III. <sup>1</sup>H and <sup>13</sup>C NMR Spectra</b> | <b>Page 26</b> |
| <b>IV. References</b>                                    | <b>Page 55</b> |

## General Information

All reactions were carried out using anhydrous solvents and under an inert atmosphere of nitrogen, unless stated. All reaction vessels were flame dried before use. Solvents were obtained by passing through anhydrous alumina columns using an Innovative Technology Inc. PS-400-7 solvent purification system. All reagents were purchased from commercial suppliers: Acros Organics, Alfa Aesar, Sigma Aldrich or Novabiochem and used without further purification. All reactions were monitored by thin layer chromatography (TLC) using pre-coated MN Alugram Sil G/UV254 silica gel 60 aluminium backed plates. TLC plates were developed using standard techniques, UV light followed by a chemical dip, usually  $\text{KMnO}_4$  and gentle heating. Flash chromatography was performed on chromatography grade, silica 60Å particle size 35-70 micron from Fisher Scientific using the solvent system as stated.

NMR spectroscopy ( $^1\text{H}$  and  $^{13}\text{C}$ ) was performed on Brüker Avance 250 ( $^1\text{H}$  250 MHz), Brüker Avance 300 ( $^1\text{H}$  300 MHz and  $^{13}\text{C}$  75 MHz), Brüker Avance 400 ( $^1\text{H}$  400 MHz and  $^{13}\text{C}$  100 MHz) and Brüker Avance 500 ( $^1\text{H}$  500 MHz and  $^{13}\text{C}$  125 MHz) as stated. Chemical shifts are reported in parts per million (ppm) relative to tetramethylsilane (TMS) ( $\delta = 0.00$ ). Coupling constants are reported in Hertz (Hz) and signal multiplicity is denoted as singlet (s), doublet (d), triplet (t), quartet (q), septet (sept), multiplet (m), and broad (br). Mass spectroscopy was performed on a Brüker  $\mu\text{TOF}$  using electrospray ionisation (ESI) in either positive or negative ionisation as stated. Infra-red spectroscopy was carried out using a Perkin Elmer Spectrum RX FT-IR system with KBr plates, using a thin film. Melting points were determined using a Bibby Scientific Melting point apparatus Stuart SMP10 digital.

## Experimental Data

### But-3-yn-2-yloxy)(*tert*-butyl)diphenylsilane<sup>1</sup>

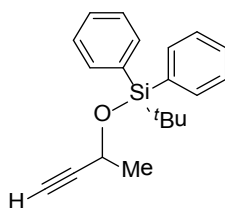

To a solution of 3-butyne-2-ol (900  $\mu$ L, 11.4 mmol, 1 equiv.) in THF (35 mL) was added triethylamine (3.30 mL, 22.7 mmol, 2 equiv.), TBDPSCl (3.20 mL, 12.5 mmol, 1.1 equiv.) and DMAP (140 mg, 1.14 mmol, 10 mol%). The resultant mixture was stirred at rt for 18 h, diluted with hexane (150 mL) and washed with  $\text{NH}_4\text{Cl}$  (sat) (150 mL) and brine (150 mL) and dried over  $\text{MgSO}_4$ , filtered and concentrated *in vacuo*. Purification via flash chromatography, eluting with 100 % Pet, afforded the title compound as a clear oil (3.27 g, 94 %).

FTIR (thin film)  $\nu_{\text{max}}$ : 3306, 3072, 3050, 2983, 2960, 2932, 2891, 2858;  $^1\text{H}$  NMR (250 MHz,  $\text{CDCl}_3$ )  $\delta_{\text{H}}$ : 7.71–7.57 (4H, m), 7.40–7.24 (6H, m), 4.38 (1H, dq,  $J = 6.5, 2.1$  Hz), 2.25 (1H, d,  $J = 2.1$  Hz), 1.31 (3H, d,  $J = 6.5$  Hz), 1.00 (9H, s);  $^{13}\text{C}$  NMR (75 MHz,  $\text{CDCl}_3$ )  $\delta_{\text{C}}$  136.4, 136.2, 134.1, 133.8, 130.2, 130.1, 128.0, 127.9, 86.5, 71.0, 31.3, 27.3, 25.6, 19.6; MS (ESI:+ve)  $m/z$ : calcd for  $\text{C}_{20}\text{H}_{24}\text{NaOSi}$ : 331.1294, found: 331.1496 [ $\text{M} + \text{Na}^+$ ].

### 4-Bromobut-3-yn-2-yloxy)(*tert*-butyl)diphenylsilane<sup>2</sup>

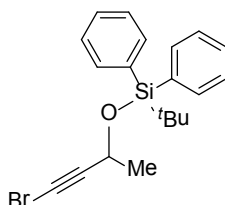

To a solution of the silyl ether **271** (10.0 g, 33.0 mmol, 1 equiv.) in acetone (180 mL) was added *N*-bromosuccinimide (6.46 g, 36.3 mmol, 1.1 equiv.) and  $\text{AgNO}_3$  (560 mg, 3.30 mmol, 10 mol%). The resultant mixture was stirred at rt for 3 h, diluted with  $\text{CHCl}_3$  (180 mL), filtered through a pad of celite and concentrated *in vacuo*. Purification via flash chromatography, eluting with 100 % Pet, afforded the title product (11.25 g, 88 %) as a light yellow oil.

FTIR (film/cm<sup>-1</sup>)  $\nu_{\max}$ : 3076, 2985, 2964, 2932, 2894, 2864; <sup>1</sup>H NMR (250 MHz, CDCl<sub>3</sub>)  $\delta_{\text{H}}$ : 7.68–7.56 (4H, m), 7.39–7.25 (6H, m), 4.37 (1H, q,  $J = 6.5$  Hz), 1.31 (3H, d,  $J = 6.5$  Hz) 0.99 (9H, s); <sup>13</sup>C NMR (75 MHz, CDCl<sub>3</sub>)  $\delta_{\text{C}}$ : 136.3, 136.2, 134.0, 133.8, 130.2, 130.1, 128.0, 127.9, 82.7, 61.2, 44.3, 27.2, 25.4, 19.6; MS (ESI:+ve)  $m/z$ : calcd for C<sub>20</sub>H<sub>23</sub>NaOSiBr: 409.0599, found: 409.0580 [M + Na<sup>+</sup>].

### 3-(3-(*tert*-Butyldiphenylsilyloxy)but-1-ynyl)oxazolidin-2-one<sup>3</sup>

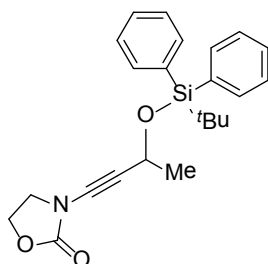

To a solution of **272** (1.50 g, 3.80 mmol, 1.1 equiv.) and oxazolidinone (300 mg, 3.50 mmol, 1 equiv.) in toluene (50 mL) was added CuSO<sub>4</sub>·5H<sub>2</sub>O (175 mg, 0.70 mmol, 20 mol%), 1,10-phenanthroline (250 mg, 1.40 mmol, 40 mol%) and K<sub>3</sub>PO<sub>4</sub> (1.50 g, 7.00 mmol, 2 equiv.). The suspension was then refluxed for 48 h, filtered through celite and concentrated *in vacuo*. Purification via flash chromatography, eluting with 4:1 Pet/EtOAc, afforded the title compound as a white powder (0.88g, 64%). Recrystallisation (Pet/CH<sub>2</sub>Cl<sub>2</sub>) afforded the title compound as colourless crystals.

MP: 110–112; FTIR (film/cm<sup>-1</sup>)  $\nu_{\max}$ : 2929, 2856, 2262, 1777; <sup>1</sup>H NMR (250 MHz, CDCl<sub>3</sub>)  $\delta_{\text{H}}$ : 7.71–7.59 (4H, m), 7.36–7.26 (6H, m), 4.58 (1H, q,  $J = 6.5$ ), 4.25 (2H, t,  $J = 8.0$  Hz), 3.51 (2H, m), 1.37 (3H, d,  $J = 6.5$  Hz), 0.99 (9H, s); <sup>13</sup>C NMR (75 MHz, CDCl<sub>3</sub>)  $\delta_{\text{C}}$ : 156.2, 136.4, 136.2, 134.3, 134.1, 130.1, 129.9, 128.0, 127.8, 74.6, 73.9, 63.2, 60.5, 47.0, 27.3, 25.5, 19.5; MS (ESI:+ve)  $m/z$ : calcd for C<sub>23</sub>H<sub>28</sub>NO<sub>3</sub>Si: 394.1838, found: 394.1822 [M + H<sup>+</sup>]

### 3-(3-Hydroxybut-1-ynyl)oxazolidin-2-one<sup>2</sup>

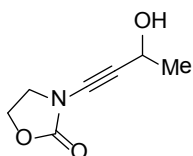

To a solution of the protected ynamide **274** (3.00g, 7.60 mmol, 1 equiv.) in THF (175 mL) was added TBAF (1M in THF, 15.2 mL, 15.2 mmol, 2 equiv.) at 0 °C. The resultant solution was then warmed to rt,

after 40 min the reaction mixture was hydrolysed with  $\text{NH}_4\text{Cl}$  (sat) (25 mL) and extracted with EtOAc ( $3 \times 25$  mL). The combined extracts were dried over  $\text{MgSO}_4$ , filtered and concentrated *in vacuo*. The crude material was purified by rapid filtration through silica gel, eluting with 100% EtOAc, to give alcohol **266** as a clear oil (1.03 g, 87%).

FTIR (film/ $\text{cm}^{-1}$ )  $\nu_{\text{max}}$ : 3245, 2924, 2854, 1765;  $^1\text{H}$  NMR (250 MHz,  $\text{CDCl}_3$ )  $\delta_{\text{H}}$ : 4.68 (1H, q,  $J = 6.6$  Hz), 4.48–4.26 (2H, m), 3.94–3.87 (2H, m), 2.49 (1H, br s), 1.47 (3H, d,  $J = 6.6\text{Hz}$ );  $^{13}\text{C}$  NMR (75 MHz,  $\text{CDCl}_3$ )  $\delta_{\text{C}}$ : 156.3, 74.1, 73.4, 63.1, 58.3, 46.8, 24.2; MS (ESI:+ve)  $m/z$ : calcd for  $\text{C}_7\text{H}_9\text{NNaO}_3$ : 178.0480, found: 178.0476 [ $\text{M} + \text{Na}^+$ ].

### General procedure for the preparation of ynamide esters<sup>157</sup>

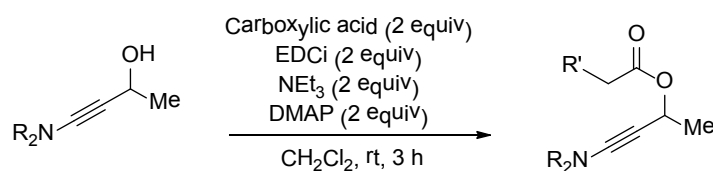

To a solution of EDCi (2 equiv) in  $\text{CH}_2\text{Cl}_2$  was successively added triethylamine (2 equiv), DMAP (20 mol%), carboxylic acid (2 equiv) and *N*-substituted propargylic alcohol (1 equiv.). After 3 hours at room temperature the resultant solution was washed with 10% citric acid ( $3 \times 10$  mL),  $\text{NaHCO}_3$  (sat) ( $3 \times 10$  mL) and brine (10 mL). The organic extract was then dried over  $\text{MgSO}_4$  and concentrated *in vacuo*. The crude mixture was then subjected to column chromatography for purification, eluting with 4:1 Pet/EtOAc.

### 4-(2-Oxooxazolidin-3-yl)but-3-yn-2-yl 2-phenylacetate (**1a**)

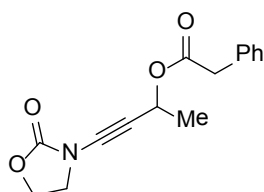

Prepared according to general procedure using 3-(3-hydroxybut-1-ynyl)oxazolidin-2-one (290 mg, 1.89 mmol, 1 equiv.), phenylacetic acid (510 mg, 3.78 mmol, 2 equiv.), EDCi (720 mg, 3.78 mmol, 2 equiv.), triethylamine (550  $\mu\text{L}$ , 3.78 mmol, 2 equiv.), DMAP (50 mg, 0.76 mmol, 20 mol%) and  $\text{CH}_2\text{Cl}_2$  (30 mL). Purification was achieved by recrystallization from  $\text{CH}_2\text{Cl}_2$ /hexane to afford **1a** as colourless crystals (0.45 g, 88 %).

MP: 115–116; FTIR (film/cm<sup>-1</sup>)  $\nu_{\max}$ : 3031, 2991, 2915, 2262, 1760, 1733; <sup>1</sup>H NMR (250 MHz, CDCl<sub>3</sub>)  $\delta_{\text{H}}$ : 7.40–7.30 (5H, m), 5.64 (1H, q,  $J = 6.8$  Hz) 4.46 (2H, m), 3.92 (2H, m), 3.66 (2H, s), 1.55 (3H, d,  $J = 6.8$  Hz); <sup>13</sup>C NMR (75 MHz, CDCl<sub>3</sub>)  $\delta_{\text{C}}$ : 170.5, 155.9, 133.7, 129.3, 128.6, 127.1, 75.1, 70.1, 63.1, 61.0, 46.7, 41.2, 21.3; MS (ESI:+ve)  $m/z$ : calcd for C<sub>15</sub>H<sub>15</sub>NNaO<sub>4</sub> : 296.0899, found: 296.0899 [M + Na]<sup>+</sup>.

#### 4-(2-Oxooxazolidin-3-yl)but-3-yn-2-yl 2-(*p*-tolyl)acetate (**1b**)

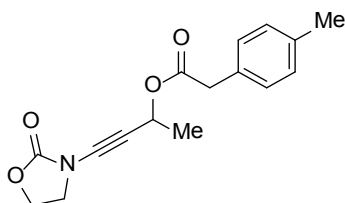

Prepared according to general procedure using; 3-(3-hydroxybut-1-ynyl)oxazolidin-2-one (331 mg, 2.14 mmol, 1 equiv.), 2-(*p*-tolyl)acetic acid (643 mg, 4.28 mmol, 2 equiv.), EDCi (821 mg, 4.28 mmol, 2 equiv.), NEt<sub>3</sub> (591  $\mu$ L, 4.28 mmol, 2 equiv.), DMAP (53 mg, 0.43 mmol, 20 mol%) and CH<sub>2</sub>Cl<sub>2</sub> (40 mL). Purification was achieved by flash chromatography affording ester **1b** as an orange solid (0.64 g, 99%). Recrystallisation (Pet/ CH<sub>2</sub>Cl<sub>2</sub>) afforded the title compound as yellow crystals.

MP: 103–105 °C; FTIR (film/cm<sup>-1</sup>)  $\nu_{\max}$ : 2986, 2264, 1768, 1735, 1520; <sup>1</sup>H NMR (300 MHz, CDCl<sub>3</sub>)  $\delta_{\text{H}}$ : 7.20 – 7.17 (2H, m), 7.16 – 7.13 (2H, m), 5.62 (1H, q,  $J = 6.7$  Hz), 4.46 – 4.41 (2H, m), 3.93 – 3.88 (2H, m), 3.60 (2H, s), 2.35 (3H, s), 1.53 (3H, d,  $J = 6.7$  Hz); <sup>13</sup>C NMR (75 MHz, CDCl<sub>3</sub>)  $\delta_{\text{C}}$ : 171.1, 155.9, 137.1, 130.7, 129.2, 129.1, 77.2, 70.2, 63.0, 61.0, 46.7, 40.8, 21.3, 21.1; MS (ESI:+ve)  $m/z$ : calcd for C<sub>16</sub>H<sub>17</sub>NO<sub>4</sub>Na: 310.1055, found: 310.1039 [M + Na]<sup>+</sup>

#### 4-(2-Oxooxazolidin-3-yl)but-3-yn-2-yl 2-(4-methoxyphenyl)acetate (**1c**)

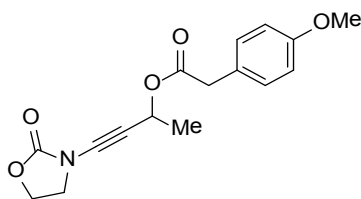

Prepared according to general procedure using; 3-(3-hydroxybut-1-ynyl)oxazolidin-2-one (343 mg, 1.89 mmol, 1 equiv.), 2-(4-methoxyphenyl)acetic acid (732 mg, 3.78 mmol, 2 equiv.), EDCi (844 mg, 4.36

mmol, 2 equiv.), triethylamine (603  $\mu\text{L}$ , 4.36 mmol, 2 equiv.), DMAP (0.03g, 0.22 mmol, 20 mol%) and  $\text{CH}_2\text{Cl}_2$  (35 mL). Purification was achieved by flash chromatography yielding ester **1c** as a yellow solid (0.53g, 79%). Recrystallisation (Pet/  $\text{CH}_2\text{Cl}_2$ ) afforded the title compound as yellow crystals.

MP: 74–76  $^\circ\text{C}$ ; FTIR (film/ $\text{cm}^{-1}$ )  $\nu_{\text{max}}$ : 2941, 2838, 2264, 1769, 1735, 1612, 1512;  $^1\text{H}$  NMR (300 MHz,  $\text{CDCl}_3$ )  $\delta_{\text{H}}$ : 7.24–7.16 (2H, m), 6.91–6.82 (2H, m), 5.61 (1H, q,  $J = 6.8$  Hz), 4.47–4.38 (2H, m), 3.93–3.84 (2H, m), 3.80 (3H, s), 3.57 (2H, s), 1.52 (3H, d,  $J = 6.8$  Hz);  $^{13}\text{C}$  NMR (75 MHz,  $\text{CDCl}_3$ )  $\delta_{\text{C}}$ : 171.2, 159.1, 138.0, 130.7, 126.1, 114.4, 77.6, 70.6, 63.4, 61.4, 55.7, 47.1, 40.8, 21.7; MS (ESI:+ve)  $m/z$ : calcd for  $\text{C}_{16}\text{H}_{18}\text{NO}_5$ : 304.1185, found: 304.1190  $[\text{M} + \text{H}]^+$ .

#### 4-(2-Oxooxazolidin-3-yl)but-3-yn-2-yl 2-(4-(dimethylamino)phenyl)acetate (**1d**)

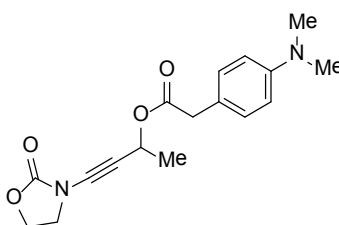

Prepared according to general procedure using; 3-(3-hydroxybut-1-ynyl)oxazolidin-2-one (674 mg, 4.40 mmol, 1 equiv.), 2-(4-(dimethylamino)phenyl)acetic acid (1.57 g, 8.80 mmol, 2 equiv.), EDCi (1.73 g, 8.8 mmol, 2 equiv.), triethylamine (1.21 mL, 8.80 mmol, 2 equiv.), DMAP (106 mg, 0.88 mmol, 20 mol%) and  $\text{CH}_2\text{Cl}_2$  (60 mL). Purification was achieved by flash chromatography yielding ester **1d** as a yellow solid (0.93 g, 68%). Recrystallisation (Pet/  $\text{CH}_2\text{Cl}_2$ ) afforded the title compound as yellow crystals.

MP: 133–135  $^\circ\text{C}$ ; FTIR (film/ $\text{cm}^{-1}$ )  $\nu_{\text{max}}$ : 2982, 2890, 2268, 1773, 1735, 1615;  $^1\text{H}$  NMR (250 MHz,  $\text{CDCl}_3$ )  $\delta_{\text{H}}$ : 7.18–7.11 (2H, m), 6.73–6.65 (2H, m), 5.60 (1H, q,  $J = 6.7$  Hz), 4.40 (2H, dd,  $J = 7.6, 6.6$  Hz), 3.87 (2H, dd,  $J = 7.6, 6.6$  Hz), 3.52 (2H, s), 2.92 (6H, s), 1.51 (3H, d,  $J = 6.7$  Hz);  $^{13}\text{C}$  NMR (75 MHz,  $\text{CDCl}_3$ )  $\delta_{\text{C}}$ : 171.2, 155.9, 129.9, 121.5, 122.8, 75.0, 70.3, 63.0, 60.8, 46.7, 40.7, 40.2, 21.4; MS (ESI:+ve)  $m/z$ : calcd for  $\text{C}_{17}\text{H}_{21}\text{N}_2\text{O}_4$ : 317.1501, found: 317.1498  $[\text{M} + \text{H}]^+$

#### 4-(2-Oxooxazolidin-3-yl)but-3-yn-2-yl 2-(4-fluorophenyl)acetate (**1e**)

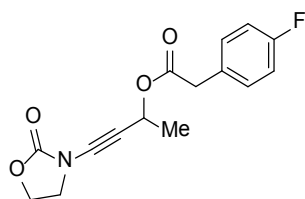

Prepared according to general procedure using; 3-(3-hydroxybut-1-ynyl)oxazolidin-2-one (674 g, 4.40 mmol, 1 equiv.), 2-(4-fluorophenyl)acetic acid (1.35 g, 8.80 mmol, 2 equiv.), EDCi (1.73 g, 8.80 mmol, 2 equiv.), triethylamine (1.21 mL, 8.80 mmol, 2 equiv.), DMAP (106 mg, 0.88 mmol, 20 mol%) and CH<sub>2</sub>Cl<sub>2</sub> (60 mL). Purification was achieved by flash chromatography yielding ester **1e** as an amorphous yellow solid (0.72g, 57%).

FTIR (film/cm<sup>-1</sup>)  $\nu_{\max}$ : 2982, 2890, 2267, 1769, 1734, 1603; <sup>1</sup>H NMR (250 MHz, CDCl<sub>3</sub>)  $\delta_{\text{H}}$ : 7.30-7.17 (2H, m), 7.05-6.94 (2H, m), 6.60 (1H, q,  $J = 6.7$  Hz), 4.42 (2H, dd,  $J = 8.0, 6.7$  Hz), 3.87 (2H, dd,  $J = 8.0, 6.7$  Hz), 3.59 (2H, s), 1.51 (3H, d,  $J = 6.7$  Hz); <sup>13</sup>C NMR (75 MHz, CDCl<sub>3</sub>)  $\delta_{\text{C}}$ : 170.4, 162.0 (d,  $J = 245.8$  Hz), 155.8, 130.9, 130.8, 129.4 (d  $J = 4.6$  Hz), 115.4 (d,  $J = 22.1$  Hz), 75.2, 70.0, 63.1, 61.2, 46.7, 40.4, 21.4; MS (ESI:+ve)  $m/z$ : calcd for C<sub>15</sub>H<sub>14</sub>FNNaO<sub>4</sub>: 314.0805, found: 314.0787 [M + Na]<sup>+</sup>

#### 4-(2-Oxooxazolidin-3-yl)but-3-yn-2-yl 2-(4-iodophenyl)acetate (**1f**)

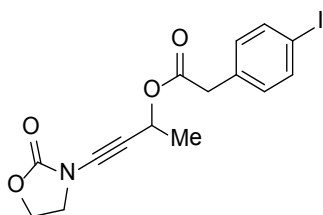

Prepared according to general procedure using; 3-(3-hydroxybut-1-ynyl)oxazolidin-2-one (342 mg, 2.21 mmol, 1 equiv.), 2-(4-iodophenyl)acetic acid (904 mg, 3.42 mmol, 2 equiv.), EDCi (843 mg, 3.42 mmol, 2 equiv.), triethylamine (598 mL, 3.42 mmol, 2 equiv.), DMAP (27 mg, 0.22 mmol, 20 mol%) and CH<sub>2</sub>Cl<sub>2</sub> (30 mL). Purification was achieved by flash chromatography yielding ester **1f** as a yellow solid (0.62g, 71%). Recrystallisation (Pet/ CH<sub>2</sub>Cl<sub>2</sub>) afforded the title compound as yellow crystals.

MP: 92–94 °C; FTIR (film/cm<sup>-1</sup>)  $\nu_{\max}$ : 2988, 2263, 1766, 1732, 1589; <sup>1</sup>H NMR (300 MHz, CDCl<sub>3</sub>)  $\delta_{\text{H}}$ : 7.65 (2H, app.d,  $J = 8.5$  Hz), 7.04 (2H, app. d,  $J = 8.5$  Hz), 5.60 (1H, q,  $J = 6.9$  Hz), 4.45 (1H, d,  $J = 7.8$



Hz), 4.42 (1H, d,  $J = 6.6$  Hz), 3.90 (1H, d,  $J = 6.6$  Hz), 3.87 (1H, d,  $J = 7.8$  Hz), 3.57 (2H, s), 1.51 (3H, d,  $J = 6.9$  Hz);  $^{13}\text{C}$  NMR (75 MHz,  $\text{CDCl}_3$ )  $\delta_{\text{C}}$ : 169.9, 155.9, 137.6, 133.3, 131.4, 92.7, 75.5, 69.9, 63.1, 61.3, 46.7, 40.7, 21.4; MS (ESI:+ve)  $m/z$ : calcd for:  $\text{C}_{15}\text{H}_{14}\text{NO}_4\text{INa}$ , 421.9866 found: 422.0001 [ $\text{M} + \text{Na}$ ] $^+$

#### 4-(2-Oxooxazolidin-3-yl)but-3-yn-2-yl 2-(benzo[d][1,3]dioxol-5-yl)acetate (**1g**)

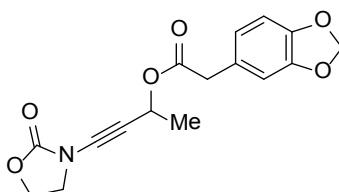

Prepared according to general procedure using; 3-(3-hydroxybut-1-ynyl)oxazolidin-2-one (671 g, 4.40 mmol, 1 equiv.), 2-(benzo[d][1,3]dioxol-5-yl)acetic acid (1.58 g, 8.80 mmol, 2 equiv.), EDCi (1.72 g, 8.80 mmol, 2 equiv.), triethylamine (1.21 mL, 8.80 mmol, 2 equiv.), DMAP (106 mg, 0.88 mmol, 20 mol%) and  $\text{CH}_2\text{Cl}_2$  (60 mL). Purification was achieved by flash chromatography yielding ester **1g** as a yellow solid (0.81 g, 60%). Recrystallisation (Pet/  $\text{CH}_2\text{Cl}_2$ ) afforded the title compound as yellow crystals.

MP: 107–109 °C; FTIR (film/ $\text{cm}^{-1}$ )  $\nu_{\text{max}}$ : 2982, 2890, 2267, 1768, 1733, 1613;  $^1\text{H}$  NMR (250 MHz,  $\text{CDCl}_3$ )  $\delta_{\text{H}}$ : 6.79–6.67 (3H, m), 5.93 (2H, s), 5.59 (1H, q,  $J = 6.7$  Hz), 4.41 (2H, dd,  $J = 7.8, 6.7$  Hz), 3.88 (2H, dd,  $J = 7.8, 6.7$  Hz), 3.52 (2H, s), 1.51 (3H, d,  $J = 6.7$  Hz);  $^{13}\text{C}$  NMR (75 MHz,  $\text{CDCl}_3$ )  $\delta_{\text{C}}$ : 170.6, 155.9, 147.2, 146.8, 127.2, 122.5, 109.7, 108.3, 101.0, 75.2, 70.1, 63.0, 61.1, 46.7, 40.8, 21.4; MS (ESI:+ve)  $m/z$ : calcd for  $\text{C}_{16}\text{H}_{15}\text{NNaO}_6$ : 340.0797, found: 340.0776.

#### 4-(2-Oxooxazolidin-3-yl)but-3-yn-2-yl acetate<sup>4</sup> (**1h**)

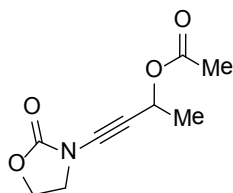

Acetic anhydride (356  $\mu\text{L}$ , 3.77 mmol, 1.1 equiv.),  $\text{Et}_3\text{N}$  (715  $\mu\text{L}$ , 5.15 mmol, 1.75 equiv.) and DMAP (42 mg, 0.34 mmol, 10 mol%) were added to a round bottomed flask containing  $\text{CH}_2\text{Cl}_2$  (20 mL) followed by 3-(3-hydroxybut-1-ynyl)oxazolidin-2-one (531mg, 3.43 mmol, 1 equiv.) in  $\text{CH}_2\text{Cl}_2$  (5 mL)

was added and the reaction was allowed to stir at room temperature for 3 hours. Upon completion, the reaction was concentrated *in vacuo* and subjected to column chromatography, eluting with 2:1 Pet/EtOAc, affording **1h** as a clear oil (603 mg, 89 %).

FTIR (thin film)  $\nu_{\max}$ : 2968, 2938, 2877, 2267, 1770, 1712;  $^1\text{H}$  NMR (500 MHz,  $\text{CDCl}_3$ )  $\delta_{\text{H}}$ : 5.59 (1H, q,  $J = 6.7$  Hz), 4.46–4.42 (2H, m), 3.94–3.90 (2H, m), 2.07 (3H, s), 1.53 (3H, d,  $J = 6.7$  Hz);  $^{13}\text{C}$  NMR (125 MHz,  $\text{CDCl}_3$ )  $\delta_{\text{C}}$ : 169.9, 155.9, 74.9, 70.2, 63.0, 60.6, 46.7, 21.4, 21.1; HRMS (ESI, +ve)  $m/z$ : calcd. for  $\text{C}_9\text{H}_{11}\text{NO}_4\text{Na}$ : 220.0586, found: 220.0585  $[\text{M} + \text{Na}]^+$ .

### General procedure for the [3,3]-rearrangement and nucleophilic addition of ynamido esters

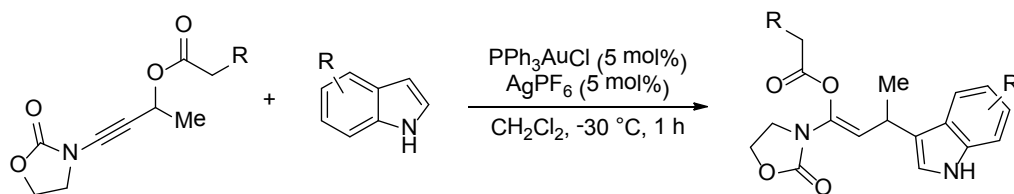

To a solution of indole (1 equiv.) and ynamido ester (1 equiv.) in  $\text{CH}_2\text{Cl}_2$  at  $-30\text{ }^\circ\text{C}$  was added  $\text{PPh}_3\text{AuCl}$  (2.5 mol%) followed by  $\text{AgPF}_6$  (2.5 mol%) portion-wise after 10 min. A further addition of  $\text{PPh}_3\text{AuCl}$  (2.5 mol%) followed by  $\text{AgPF}_6$  (2.5 mol%) portion-wise after 20 min, before stirring for a further 25 min. Upon consumption of starting material, the reaction was filtered through a pad of silica and concentrated *in vacuo*. Purification was achieved by flash chromatography, eluting with 2:1 Pet/EtOAc.

### (Z)-3-(But-2-enyl)oxazolidin-2-one (Z-2)

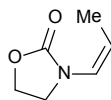

To a solution of **1a** (50 mg, 0.18 mmol, 1 equiv.) in  $\text{CH}_2\text{Cl}_2$  (2 mL) was added  $\text{AuCl}(\text{PPh}_3)$  (4.5 mg, 0.01 mmol, 5 mol%) and  $\text{AgSbF}_6$  (3.4 mg, 0.01 mmol, 5 mol%). The reaction mixture was allowed to stir at room temperature for 5 minutes before being filtered through a pad of silica. Purification by flash chromatography afforded **Z-2** as a light yellow oil (1 mg, 4%).

FTIR (film/ $\text{cm}^{-1}$ )  $\nu_{\text{max}}$ : 2981, 2920, 1770, 1679, 1628;  $^1\text{H}$  NMR (500 MHz,  $\text{CDCl}_3$ )  $\delta_{\text{H}}$ : 7.03 (1H, dq,  $J = 11.7, 1.8$  Hz), 6.49 (1H, dq,  $J = 11.7, 7.3$  Hz), 4.42 (2H, app. t,  $J = 8.0$  Hz), 4.07 (2H, app. t,  $J = 8.0$  Hz), 2.16 (3H, dd,  $J = 7.3, 1.8$  Hz);  $^{13}\text{C}$  NMR (75 MHz,  $\text{CDCl}_3$ )  $\delta_{\text{C}}$ : 165.2, 153.5, 146.8, 119.7, 62.0, 42.5, 16.2; MS (ESI:+ve)  $m/z$ : calcd for  $\text{C}_7\text{H}_9\text{NO}_3\text{Na}$ : 178.0480, found: 178.0495,  $[\text{M} + \text{Na}]^+$ .

### (Z)-3-(1H-Indol-3-yl)-1-(2-oxooxazolidin-3-yl)but-1-en-1-yl 2-phenylacetate (4a)

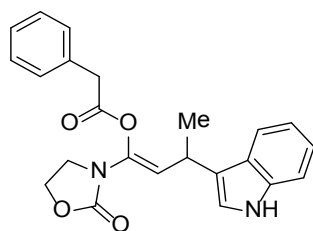

Prepared according to general procedure D using, indole (21 mg, 0.18 mmol, 1 equiv.), **1a** (50 mg, 0.18 mmol, 1 equiv.), AuCl(PPh<sub>3</sub>) (4.5 mg, 0.01 mmol, 5 mol%), AgPF<sub>6</sub> (2.3 mg, 0.01 mmol, 5 mol%) and CH<sub>2</sub>Cl<sub>2</sub> (2 mL). Purification by flash chromatography afforded enamide **4a** as a light yellow oil (65 mg, 93%).

FTIR (thin film)  $\nu_{\max}$ : 3659, 3408, 2981, 2972, 2889, 1758, 1686, 1621; <sup>1</sup>H NMR (500 MHz, CDCl<sub>3</sub>)  $\delta_{\text{H}}$ : 8.06 (1H, br.s), 7.55 (1H, d,  $J = 7.8$  Hz), 7.35–7.32 (5H, m), 7.19 (1H, app.t,  $J = 7.8$  Hz), 7.10 (1H, app.t,  $J = 7.8$  Hz), 6.93 (1H, d,  $J = 2.3$  Hz), 5.23 (1H, d,  $J = 9.6$  Hz), 4.26 (2H, app.t,  $J = 8.1$ Hz), 3.80 (2H, s), 3.77–3.71 (1H, m), 3.69–3.63 (2H, m), 1.42 (3H, d,  $J = 6.8$  Hz); <sup>13</sup>C NMR (125 MHz, CDCl<sub>3</sub>)  $\delta_{\text{C}}$ : 169.4, 154.4, 136.5, 136.3, 133.0, 129.5, 128.8, 127.5, 126.5, 122.0, 120.4, 119.7, 119.3, 119.3, 114.6, 111.2, 61.7, 45.3, 40.7, 27.7, 20.8; HRMS (ESI, +ve)  $m/z$ : calcd. for C<sub>23</sub>H<sub>22</sub>N<sub>2</sub>O<sub>4</sub>Na: 413.1483, found: 413.1477 [M + Na]<sup>+</sup>.

**(Z)-3-(1H-Indol-3-yl)-1-(2-oxooxazolidin-3-yl)but-1-en-1-yl 2-(p-tolyl)acetate (4b)**

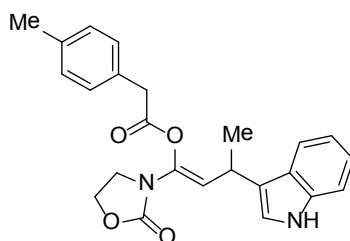

Prepared according to the general procedure using, indole (20 mg, 0.17 mmol, 1 equiv.), **1b** (50 mg, 0.17 mmol, 1 equiv.), AuCl(PPh<sub>3</sub>) (4.3 mg, 0.01 mmol, 5 mol%), AgPF<sub>6</sub> (2.2 mg, 0.01 mmol, 5 mol%) and CH<sub>2</sub>Cl<sub>2</sub> (2 mL). Purification by flash chromatography afforded enamide **4b** as a light yellow oil (60 mg, 85%).

FTIR (thin film)  $\nu_{\max}$ : 3414, 2980, 2890, 1760, 1685; <sup>1</sup>H NMR (400 MHz, CDCl<sub>3</sub>)  $\delta_{\text{H}}$ : 7.95 (1H, br. s), 7.53 (1H, d,  $J = 7.9$  Hz), 7.35 (1H, d,  $J = 7.9$  Hz), 7.23–7.16 (3H, m), 7.15–7.06 (3H, m), 6.96 (1H, d,  $J = 1.9$  Hz), 5.25 (1H, d,  $J = 9.7$  Hz), 4.33–4.25 (2H, m), 3.77 (2H, s), 3.76–3.66 (3H, m), 2.33 (3H, s),

1.41 (3H, d,  $J = 7.1$  Hz);  $^{13}\text{C}$  NMR (100 MHz,  $\text{CDCl}_3$ )  $\delta_{\text{C}}$ : 169.6, 154.5, 137.2, 136.5, 136.3, 129.9, 1295, 129.3, 126.6, 122.1, 1203, 119.9, 119.4, 119.3, 114.7, 111.1, 61.7, 45.4, 40.3, 27.7, 21.1, 20.9; HRMS (ESI, +ve)  $m/z$ : calcd. for  $\text{C}_{24}\text{H}_{24}\text{N}_2\text{O}_4\text{Na}$ : 427.1634, found: 427.1695  $[\text{M} + \text{Na}]^+$ .

**(Z)-3-(1H-Indol-3-yl)-1-(2-oxooxazolidin-3-yl)but-1-en-1-yl 2-(4-methoxyphenyl)acetate (4c)**

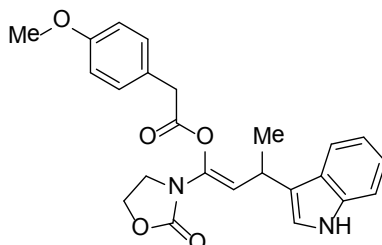

Prepared according to the general procedure using, indole (19 mg, 0.17 mmol, 1 equiv.), **1c** (50 mg, 0.17 mmol, 1 equiv.),  $\text{AuCl}(\text{PPh}_3)$  (4.1 mg, 0.01 mmol, 5 mol%),  $\text{AgPF}_6$  (2.1 mg, 0.01 mmol, 5 mol%) and  $\text{CH}_2\text{Cl}_2$  (2 mL). Purification by flash chromatography afforded enamide **4c** as a light brown oil (51 mg, 74%).

FTIR (thin film)  $\nu_{\text{max}}$ : 3384, 2959, 2927, 1756, 1691, 1612;  $^1\text{H}$  NMR (400 MHz,  $\text{CDCl}_3$ )  $\delta_{\text{H}}$ : 8.08 (1H, br. s), 7.59 (1H, app. d,  $J = 7.9$  Hz), 7.38 (1H, app. d,  $J = 7.9$  Hz), 7.30–7.19 (2H, m), 7.16–7.11 (1H, m), 7.01–6.97 (1H, m), 6.95–6.85 (2H, m), 5.28 (1H, d,  $J = 9.6$  Hz), 4.31 (2H, app. t,  $J = 8.2$  Hz), 3.89–3.63 (8H, m), 1.46 (3H, d,  $J = 7.0$  Hz);  $^{13}\text{C}$  NMR (100 MHz,  $\text{CDCl}_3$ )  $\delta_{\text{C}}$ : 169.8, 159.0, 154.6, 136.5, 136.3, 130.6, 126.5, 125.1, 122.0, 120.4, 119.8, 119.4, 119.3, 114.7, 114.2, 111.2, 61.8, 55.3, 45.4, 39.8, 27.7, 20.9; HRMS (ESI, +ve)  $m/z$ : calcd. for:  $\text{C}_{24}\text{H}_{24}\text{N}_2\text{O}_5\text{Na}$ , 443.1583 found: 443.1648  $[\text{M} + \text{Na}]^+$ .

**(Z)-3-(1H-Indol-3-yl)-1-(2-oxooxazolidin-3-yl)but-1-en-1-yl 2-(4-(dimethylamino)phenyl)acetate (4d)**

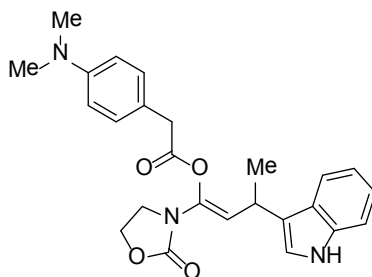

Prepared according to the general procedure using, indole (37 mg, 0.32 mmol, 1 equiv.), **1d** (100 mg, 0.32 mmol, 1 equiv.), AuCl(PPh<sub>3</sub>) (7.8 mg, 0.02 mmol, 5 mol%), AgPF<sub>6</sub> (4.0 mg, 0.02 mmol, 5 mol%) and CH<sub>2</sub>Cl<sub>2</sub> (4 mL). Purification by flash chromatography afforded enamide **4d** as a light yellow oil (119 mg, 87%).

FTIR (thin film)  $\nu_{\max}$ : 3406, 2981, 2980, 1751, 1683, 1614, 1522; <sup>1</sup>H NMR (400 MHz, CDCl<sub>3</sub>)  $\delta_{\text{H}}$ : 8.01 (1H, br. s), 7.56 (1H, app. d,  $J = 8.0$  Hz), 7.33 (1H, app. d,  $J = 8.0$  Hz), 7.23–7.12 (3H, m), 7.08 (1H, app. t,  $J = 7.5$  Hz), 6.95 (1H, d,  $J = 1.8$  Hz), 6.68 (2H, app. d,  $J = 8.6$  Hz), 5.30 (1H, d,  $J = 9.7$  Hz), 4.26 (2H, app. t,  $J = 8.1$  Hz), 3.80–3.61 (5H, m), 2.92 (6H, s), 1.41 (3H, d,  $J = 7.0$  Hz); <sup>13</sup>C NMR (100 MHz, CDCl<sub>3</sub>)  $\delta_{\text{C}}$ : 170.1, 154.6, 149.8, 136.6, 136.2, 130.1, 126.5, 121.9, 120.9, 120.4, 119.8, 119.5, 119.3, 115.0, 113.0, 111.2, 61.8, 45.3, 40.8, 39.8, 27.7, 21.0; HRMS (ESI, +ve)  $m/z$ : calcd. for C<sub>25</sub>H<sub>28</sub>N<sub>3</sub>O<sub>4</sub>: 434.2080, found: 434.2084 [M + Na]<sup>+</sup>.

**(Z)-3-(1H-Indol-3-yl)-1-(2-oxooxazolidin-3-yl)but-1-en-1-yl 2-(4-fluorophenyl)acetate (4e)**

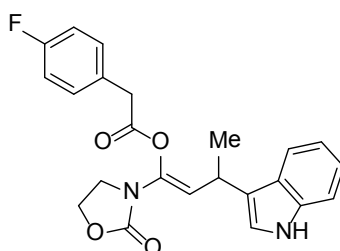

Prepared according to the general procedure using, indole (21 mg, 0.18 mmol, 1 equiv.), **1e** (50 mg, 0.18 mmol, 1 equiv.), AuCl(PPh<sub>3</sub>) (4.5 mg, 0.01 mmol, 5 mol%), AgPF<sub>6</sub> (2.3 mg, 0.01 mmol, 5 mol%) and CH<sub>2</sub>Cl<sub>2</sub> (2 mL). Purification by flash chromatography afforded enamide **4e** as a light pink oil (55 mg, 79%).

FTIR (thin film)  $\nu_{\max}$ : 3383, 2959, 1924, 2854, 1754, 1696;  $^1\text{H}$  NMR (400 MHz,  $\text{CDCl}_3$ )  $\delta_{\text{H}}$ : 8.07 (1H, br. s), 7.60–7.56 (2H, m), 7.42–7.37 (1H, m), 7.33–7.27 (2H, m), 7.27–7.20 (1H, m), 7.17–7.12 (1H, m), 7.07–7.00 (2H, m), 7.00–6.99 (1H, m), 5.22 (1H, d,  $J = 9.1$  Hz), 4.38–4.31 (2H, m), 3.83 (2H, s), 3.82–3.72 (3H, m), 1.46 (3H, d,  $J = 7.3$  Hz);  $^{13}\text{C}$  NMR (100 MHz,  $\text{CDCl}_3$ )  $\delta_{\text{C}}$ : 169.2, 154.3 (d,  $J = 245.4$  Hz), 136.5 (d,  $J = 6.1$  Hz), 134.2, (d,  $J = 15.3$  Hz), 131.1 (d,  $J = 7.6$  Hz), 128.8, 126.5, 122.1, 120.3, 119.7, 119.4, 119.3, 115.7, 115.5, 114.1, 111.2, 61.7, 45.5, 39.7, 27.7, 20.7; HRMS (ESI, +ve)  $m/z$ : calcd. for  $\text{C}_{23}\text{H}_{21}\text{N}_2\text{O}_4\text{FNa}$ : 431.1383, found: 431.1489  $[\text{M} + \text{Na}]^+$ .

**(Z)-3-(1H-Indol-3-yl)-1-(2-oxooxazolidin-3-yl)but-1-en-1-yl 2-(4-iodophenyl)acetate (4f)**

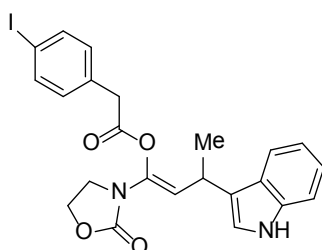

Prepared according to the general procedure using, indole (15 mg, 0.13 mmol, 1 equiv.), **1f** (50 mg, 0.13 mmol, 1 equiv.),  $\text{AuCl}(\text{PPh}_3)$  (3 mg, 0.006 mmol, 5 mol%),  $\text{AgPF}_6$  (1.6 mg, 0.006 mmol, 5 mol%) and  $\text{CH}_2\text{Cl}_2$  (2 mL). Purification by flash chromatography afforded enamide **4f** as an orange solid (60 mg, 92%). Recrystallisation (Pet/  $\text{CH}_2\text{Cl}_2$ ) afforded the title compound as orange crystals.

MP: 127–129 °C; FTIR (thin film)  $\nu_{\max}$ : 3261, 2971, 2911, 1772, 1720, 1683;  $^1\text{H}$  NMR (400 MHz,  $\text{CDCl}_3$ )  $\delta_{\text{H}}$ : 8.07 (1H, br. s), 7.67 (2H, app. d,  $J = 8.4$  Hz), 7.59–7.55 (1H, m), 7.42–7.37 (1H, m), 7.27–7.22 (1H, m), 7.19–7.14 (1H, m), 7.07 (2H, app. d,  $J = 8.4$  Hz), 7.01–7.00 (1H, m), 5.21 (1H, d,  $J = 9.6$  Hz), 4.40–4.36 (2H, m), 3.79 (2H, s), 3.79–3.72 (3H, m), 1.47 (3H, d,  $J = 7.0$  Hz);  $^{13}\text{C}$  NMR (100 MHz,  $\text{CDCl}_3$ )  $\delta_{\text{C}}$ : 168.8, 154.3, 137.8, 136.5, 134.3, 134.1, 132.6, 131.5, 129.4, 126.5, 122.1, 120.4, 119.7, 119.5, 119.3, 114.1, 111.3, 93.1, 61.7, 45.6, 40.1, 27.7, 21.1; HRMS (ESI, +ve)  $m/z$ : calcd. for  $\text{C}_{23}\text{H}_{21}\text{N}_2\text{O}_4\text{INa}$ : 539.0444, found: 539.0490  $[\text{M} + \text{Na}]^+$ .

**(Z)-3-(1H-Indol-3-yl)-1-(2-oxooxazolidin-3-yl)but-1-en-1-yl 2-(benzo[d][1,3]dioxol-5-yl)acetate (4g)**

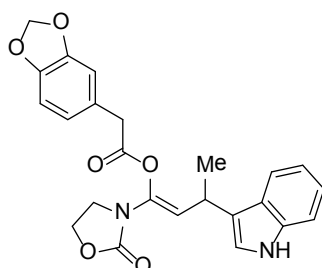

Prepared according to the general procedure using, indole (18 mg, 0.16 mmol, 1 equiv.), **1g** (50 mg, 0.16 mmol, 1 equiv.), AuCl(PPh<sub>3</sub>) (4.0 mg, 0.01 mmol, 5 mol%), AgPF<sub>6</sub> (2.0 mg, 0.01 mmol, 5 mol%) and CH<sub>2</sub>Cl<sub>2</sub> (2 mL). Purification by flash chromatography afforded enamide **4g** as a light brown oil (26 mg, 38%).

FTIR (thin film)  $\nu_{\max}$ : 3385, 2966, 1770, 1706; <sup>1</sup>H NMR (400 MHz, CDCl<sub>3</sub>)  $\delta_{\text{H}}$ : 8.03 (1H, br. s), 7.64–7.49 (2H, m), 7.39 (1H, app.d,  $J = 8.0$  Hz), 7.26–7.18 (1H, m), 7.17–7.11 (1H, m), 7.01 (1H, app. d,  $J = 1.8$  Hz), 6.85 (1H, s), 6.79 (1H, s), 5.98–5.94 (2H, m), 5.26 (1H, d,  $J = 9.6$  Hz), 4.34 (2H, t,  $J = 8.1$  Hz), 3.84–3.69 (5H, m), 1.47 (3H, d,  $J = 7.0$  Hz); <sup>13</sup>C NMR (100 MHz, CDCl<sub>3</sub>)  $\delta_{\text{C}}$ : 169.6, 154.5, 147.9, 136.5, 136.4, 126.5, 122.7, 122.1, 120.4, 119.8, 119.3, 114.6, 111.2, 110.0, 108.5, 101.1, 61.7, 45.5, 40.3, 27.7, 20.9; HRMS (ESI, +ve)  $m/z$ : calcd. for, C<sub>24</sub>H<sub>22</sub>N<sub>2</sub>O<sub>6</sub>Na: 457.1376 found: 457.1411 [M + Na]<sup>+</sup>.

**(Z)-3-(1H-Indol-3-yl)-1-(2-oxooxazolidin-3-yl)but-1-en-1-yl acetate (4h)**

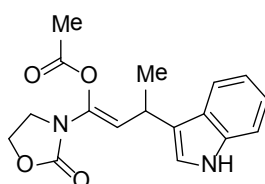

Prepared according to general procedure D using, indole (30 mg, 0.25 mmol, 1 equiv.), **1h** (50 mg, 0.25 mmol, 1 equiv.), AuCl(PPh<sub>3</sub>) (6.0 mg, 0.013 mmol, 5 mol%), AgPF<sub>6</sub> (5.0 mg, 0.013 mmol, 5 mol%) and CH<sub>2</sub>Cl<sub>2</sub> (2 mL). Purification by flash chromatography afforded enamide **4h** as a brown oil (70 mg, 89%).

FTIR (thin film)  $\nu_{\max}$ : 3658, 3407, 2981, 2972, 2889, 1754, 1685, 1621; <sup>1</sup>H NMR (500 MHz, CDCl<sub>3</sub>)  $\delta_{\text{H}}$ : 8.14 (1H, br.s), 7.69 (1H, d,  $J = 7.7$  Hz), 7.36 (1H, d,  $J = 7.7$  Hz), 7.20 (1H, app.t,  $J = 7.5$  Hz), 7.13 (1H, app.t,  $J = 7.5$  Hz), 7.01 (1H, d,  $J = 1.6$  Hz), 5.19 (1H, d,  $J = 9.6$  Hz), 4.31 (2H, app.t,  $J = 8.3$  Hz), 3.95–



3.86 (1H, m), 3.78–3.73 (2H, m), 2.27 (3H, s), 1.51 (3H, d,  $J = 6.8$  Hz);  $^{13}\text{C}$  NMR (125 MHz,  $\text{CDCl}_3$ )  $\delta_{\text{C}}$ : 167.8, 154.4, 136.6, 136.4, 134.3, 126.6, 122.0, 120.4, 119.7, 119.3, 114.1, 111.3, 61.7, 45.5, 27.8, 20.8, 20.3; HRMS (ESI, +ve)  $m/z$ : calcd. for  $\text{C}_{17}\text{H}_{18}\text{N}_2\text{O}_4\text{Na}$ : 337.1164, found: 337.1176  $[\text{M} + \text{Na}]^+$ .

**(Z)-3-(5-Methyl-1H-indol-3-yl)-1-(2-oxooxazolidin-3-yl)but-1-en-1-yl 2-phenylacetate (4i)**

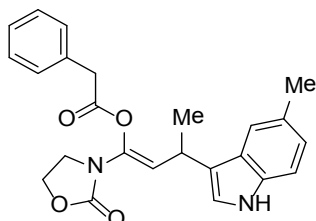

Prepared according to the general procedure using, 5-methyl indole (24 mg, 0.18 mmol, 1 equiv.), **1a** (50 mg, 0.18 mmol, 1 equiv.),  $\text{AuCl}(\text{PPh}_3)$  (4.5 mg, 0.01 mmol, 5 mol%),  $\text{AgPF}_6$  (2.3 mg, 0.01 mmol, 5 mol%) and  $\text{CH}_2\text{Cl}_2$  (2 mL). Purification by flash chromatography afforded enamide **4i** as a light yellow oil (65 mg, 89%).

FTIR (thin film)  $\nu_{\text{max}}$ : 3659, 3407, 2981, 2972, 2889, 1755, 1689, 1627;  $^1\text{H}$  NMR (400 MHz,  $\text{CDCl}_3$ )  $\delta_{\text{H}}$ : 7.95 (1H, br.s), 7.63–7.50 (1H, m), 7.40–7.32 (5H, m), 7.27 (1H, d,  $J = 8.3$  Hz), 7.06 (1H, dd,  $J = 8.3, 1.6$  Hz), 6.93 (1H, dd,  $J = 2.6, 0.7$  Hz), 5.29 (1H, d,  $J = 9.6$  Hz), 4.31 (2H, app.t,  $J = 8.1$  Hz), 3.86 (2H, s), 3.79–3.66 (3H, m), 2.51 (3H, s), 1.44 (3H, d,  $J = 6.9$  Hz);  $^{13}\text{C}$  NMR (100 MHz,  $\text{CDCl}_3$ )  $\delta_{\text{C}}$ : 169.4, 154.5, 136.3, 134.9, 133.1, 129.5, 128.8, 128.4, 127.5, 126.7, 123.6, 120.5, 119.2, 119.0, 114.9, 110.9, 61.7, 45.4, 40.7, 27.7, 21.6, 21.0; HRMS (ESI, +ve)  $m/z$ : calcd. for  $\text{C}_{24}\text{H}_{24}\text{N}_2\text{O}_4\text{Na}$ : 427.1634, found: 427.1615  $[\text{M} + \text{Na}]^+$ .

**(Z)-3-(5-Fluoro-1H-indol-3-yl)-1-(2-oxooxazolidin-3-yl)but-1-en-1-yl 2-phenylacetate (4k)**

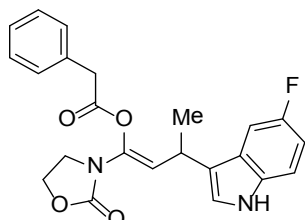

Prepared according to general procedure using, 5-fluoroindole (25 mg, 0.18 mmol, 1 equiv.), **1a** (50 mg, 0.18 mmol, 1 equiv.),  $\text{AuCl}(\text{PPh}_3)$  (4.5 mg, 0.01 mmol, 5 mol%),  $\text{AgPF}_6$  (2.3 mg, 0.01 mmol, 5 mol%)

and CH<sub>2</sub>Cl<sub>2</sub> (2 mL). Purification by flash chromatography afforded enamide **4k** as a pink oil (74 mg, 99%).

FTIR (thin film)  $\nu_{\max}$ : 3359, 2959, 2924, 1754, 1697; <sup>1</sup>H NMR (400 MHz, (CD<sub>3</sub>)<sub>2</sub>CO)  $\delta_{\text{H}}$ : 10.07 (1H, br. s), 7.43–7.39 (2H, m), 7.38–7.32 (3H, m), 7.32–7.22 (2H, m), 7.21–7.18 (1H, m), 6.89 (1H, td,  $J = 9.2, 2.6$  Hz), 5.29 (1H, d,  $J = 9.9$  Hz), 4.39–4.32 (2H, m), 3.94 (2H, s), 3.88–3.76 (2H, m), 3.75–3.66 (1H, m), 1.37 (3H, d,  $J = 7.0$  Hz); <sup>13</sup>C NMR (100 MHz, (CD<sub>3</sub>)<sub>2</sub>CO)  $\delta_{\text{C}}$ : 168.9, 157.3 (d,  $J = 231.6$  Hz), 154.0, 136.9, 133.9, 133.6, 129.6, 128.5, 127.2, 127.0 (d,  $J = 8.8$  Hz), 122.9, 119.4 (d,  $J = 4.6$  Hz), 112.4, 112.1 (d,  $J = 8.8$  Hz), 109.3 (d,  $J = 24.6$  Hz), 103.8 (d,  $J = 24.6$  Hz), 61.7, 45.0, 40.1, 27.4, 20.5; HRMS (ESI, +ve)  $m/z$ : calcd. for C<sub>23</sub>H<sub>21</sub>N<sub>2</sub>O<sub>4</sub>FNa: 431.1383, found: 431.1399 [M + Na]<sup>+</sup>.

**(Z)-3-(5-Iodo-1H-indol-3-yl)-1-(2-oxooxazolidin-3-yl)but-1-en-1-yl 2-phenylacetate (4j)**

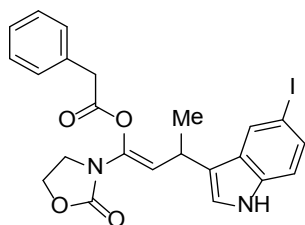

Prepared according to general procedure D using, 5-iodoindole (45 mg, 0.18 mmol, 1 equiv.), **1a** (50 mg, 0.18 mmol, 1 equiv.), AuCl(PPh<sub>3</sub>) (4.5 mg, 0.01 mmol, 5 mol%), AgPF<sub>6</sub> (2.3 mg, 0.01 mmol, 5 mol%) and CH<sub>2</sub>Cl<sub>2</sub> (2 mL). Purification by flash chromatography afforded enamide **4j** as a orange solid (87 mg, 92%). Recrystallisation (Pet/ CH<sub>2</sub>Cl<sub>2</sub>) afforded the title compound as orange crystals.

MP: 135–136 °C; FTIR (thin film)  $\nu_{\max}$ : 3261, 2970, 2911, 1772, 1720, 1683; <sup>1</sup>H NMR (400 MHz, CDCl<sub>3</sub>)  $\delta_{\text{H}}$ : 8.15 (1H, br. s), 7.91–7.87 (1H, m), 7.46 (1H, dd,  $J = 8.5, 1.7$  Hz), 7.42–7.33 (5H, m), 7.15 (1H, d,  $J = 8.5$  Hz), 6.94–6.91 (1H, m), 5.32 (1H, d,  $J = 9.7$  Hz), 4.36–4.30 (2H, m), 3.84 (2H, s), 3.75–3.69 (2H, m), 3.68–3.57 (1H, m), 1.38 (3H, d,  $J = 7.0$  Hz); <sup>13</sup>C NMR (100 MHz, CDCl<sub>3</sub>)  $\delta_{\text{C}}$ : 169.3, 154.7, 136.3, 135.6, 133.0, 130.3, 129.4, 129.1, 128.9, 128.1, 127.7, 121.3, 119.2, 114.6, 113.3, 82.8, 61.8, 45.2, 40.9, 27.5, 21.2; HRMS (ESI, +ve)  $m/z$ : calcd. for C<sub>23</sub>H<sub>21</sub>N<sub>2</sub>O<sub>4</sub>INa: 539.0444, found: 539.0472 [M + Na]<sup>+</sup>.

**(Z)-Methyl 3-(4-(2-oxooxazolidin-3-yl)-4-(2-phenylacetoxy)but-3-en-2-yl)-1H-indole-5-carboxylate (4l)**

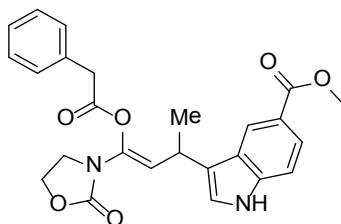

Prepared according to general procedure D using, indole (32 mg, 0.18 mmol, 1 equiv.), **1a** (50 mg, 0.18 mmol, 1 equiv.), AuCl(PPh<sub>3</sub>) (4.5 mg, 0.01 mmol, 5 mol%), AgPF<sub>6</sub> (2.3 mg, 0.01 mmol, 5 mol%) and CH<sub>2</sub>Cl<sub>2</sub> (2 mL). Purification by flash chromatography afforded enamide **4l** as an orange oil (43 mg, 53%).

FTIR (thin film)  $\nu_{\max}$ : 3383, 2957, 2923, 2854, 1760, 1703, 1617; <sup>1</sup>H NMR (400 MHz, CDCl<sub>3</sub>)  $\delta_{\text{H}}$ : 8.46 (1H, br. s), 8.42–8.39 (1H, m), 7.92 (1H, dd,  $J = 7.0, 1.5$  Hz), 7.38–7.29 (6H, m), 7.02–7.00 (1H, m), 5.39 (1H, d,  $J = 9.7$  Hz), 4.34–4.28 (2H, m), 4.00 (3H, s), 3.84 (2H, s), 3.80–3.67 (3H, m), 1.43 (1H, d,  $J = 7.0$  Hz); <sup>13</sup>C NMR (100 MHz, CDCl<sub>3</sub>)  $\delta_{\text{C}}$ : 169.3, 168.3, 154.7, 139.2, 136.3, 133.0, 129.4, 128.8, 127.6, 126.0, 123.3, 122.4, 121.9, 121.3, 121.1, 114.7, 111.0, 61.8, 51.9, 45.2, 40.8, 27.9, 21.4; HRMS (ESI, +ve)  $m/z$ : calcd. for C<sub>25</sub>H<sub>25</sub>N<sub>2</sub>O<sub>6</sub>: 449.1713, found: 449.1749 [M + H]<sup>+</sup>.

**(Z)-3-(6-Methoxy-1H-indol-3-yl)-1-(2-oxooxazolidin-3-yl)but-1-en-1-yl 2-phenylacetate (4m)**

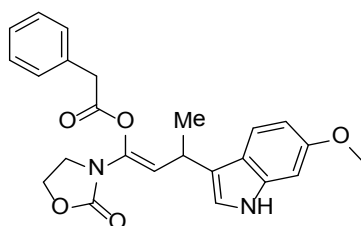

Prepared according to general procedure D using, 6-methoxy indole (27 mg, 0.18 mmol, 1 equiv.), **1a** (50 mg, 0.18 mmol, 1 equiv.), AuCl(PPh<sub>3</sub>) (4.5 mg, 0.01 mmol, 5 mol%), AgPF<sub>6</sub> (2.3 mg, 0.01 mmol, 5 mol%) and CH<sub>2</sub>Cl<sub>2</sub> (2 mL). Purification by flash chromatography afforded enamide **4m** as a light brown oil (70 mg, 92%).

FTIR (thin film)  $\nu_{\max}$ : 3401, 2981, 1754, 1684, 1628, 1628;  $^1\text{H}$  NMR (400 MHz,  $\text{CDCl}_3$ )  $\delta_{\text{H}}$ : 7.96 (1H, s), 7.40 (1H, d,  $J = 8.6$  Hz), 7.39–7.32 (5H, m), 6.88–6.84 (2H, m), 6.80 (1H, dd,  $J = 8.6, 2.2$  Hz), 5.23 (1H, d,  $J = 9.6$  Hz), 3.88 (3H, s), 3.86 (2H, s), 3.74–3.66 (3H, m), 1.43 (3H, d,  $J = 7.0$  Hz);  $^{13}\text{C}$  NMR (100 MHz,  $\text{CDCl}_3$ )  $\delta_{\text{C}}$ : 169.4, 156.5, 154.5, 137.3, 136.3, 133.1, 129.5, 128.8, 127.5, 121.0, 120.0, 119.7, 119.1, 114.7, 109.3, 94.7, 61.7, 55.7, 45.4, 40.7, 27.7, 20.8; HRMS (ESI, +ve)  $m/z$ : calcd. for  $\text{C}_{24}\text{H}_{24}\text{N}_2\text{O}_5\text{Na}$ : 443.1583, found: 443.1575  $[\text{M} + \text{Na}]^+$ .

### **(S)-(But-3-yn-2-yloxy)(tert-butyl)diphenylsilane**

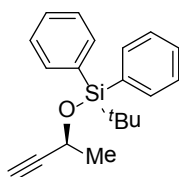

To a solution of (*S*)-3-butyn-2-ol (15.0 g, 214 mmol, 1 equiv.) in THF (200 mL) was added triethylamine (59.1 mL, 428 mmol, 2 equiv.), TBDPSCl (64.7g, 235 mmol, 1.1 equiv.) and DMAP (2.61 g, 21.4 mmol, 10 mol%). The resultant mixture was stirred at rt for 18 h, diluted with hexane (300 mL) and washed with  $\text{NH}_4\text{Cl}$  (sat) (250 mL) and brine (250 mL) and dried over  $\text{MgSO}_4$ , filtered and concentrated *in vacuo*. Purification via flash chromatography, eluting with 100 % Pet, afforded the title compound as a clear oil (66.0 g, 99 %).

$[\alpha]_{\text{D}}^{20} = +65.0$  ( $c$  1,  $\text{CH}_2\text{Cl}_2$ )

All other data as previously stated.

### **(S)-((4-Bromobut-3-yn-2-yl)oxy)(tert-butyl)diphenylsilane**

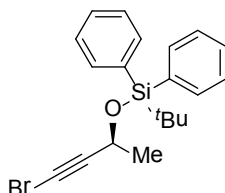

To a solution of the silyl ether (*S*)-but-3-yn-2-yloxy)(*tert*-butyl)diphenylsilane (66.0 g, 214 mmol, 1 equiv.) in acetone (250 mL) was added *N*-bromosuccinimide (41.6 g, 235 mmol, 1.1 equiv.) and  $\text{AgNO}_3$  (3.63 g, 21.4 mmol, 10 mol%). The resultant mixture was stirred at rt for 3 h, diluted with  $\text{CHCl}_3$  (250

mL), filtered through a pad of celite and concentrated *in vacuo*. Purification via flash chromatography, eluting with 100 % Pet, afforded the title compound as a light yellow oil (65.0 g, 78 %).

$$[\alpha]_{\text{D}}^{20} = +10.3 \text{ (} c \text{ 1, CH}_2\text{Cl}_2\text{)}$$

All other data as previously stated.

**(S)-3-(3-((*tert*-Butyldiphenylsilyl)oxy)but-1-yn-1-yl)oxazolidin-2-one**

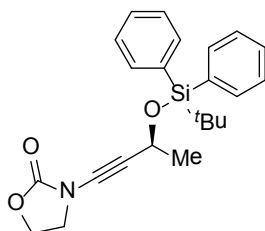

To a solution of the bromo-alkyne (*S*)-(4-bromobut-3-yn-2-yl)oxy(*tert*-butyl)diphenylsilane (5.00 g, 12.9 mmol, 1.1 equiv.) and oxazolidinone (1.02 g, 11.8 mmol, 1 equiv.) in toluene (250 mL) was added CuSO<sub>4</sub>·5H<sub>2</sub>O (586 mg, 2.35 mmol, 20 mol%), 1,10-phenanthroline (847 mg, 4.70 mmol, 40 mol%) and K<sub>3</sub>PO<sub>4</sub> (4.99 g, 23.5 mmol, 2 equiv.). The suspension was then refluxed for 48 h, filtered through celite and concentrated *in vacuo*. Purification via flash chromatography, eluting with 4:1 Pet/EtOAc, afforded the title compound as a white powder (3.14 g, 68%).

$$[\alpha]_{\text{D}}^{20} = -115.5 \text{ (} c \text{ 2, CHCl}_3\text{)}$$

All other data as previously stated.

**(S)-4-(2-Oxooxazolidin-3-yl)but-3-yn-2-yl 2-phenylacetate (S-1a)**

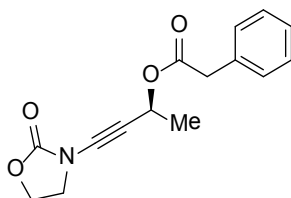

To a solution of the protected ynamide (*S*)-3-(3-((*tert*-butyldiphenylsilyl)oxy)but-1-yn-1-yl)oxazolidin-2-one (3.00g, 7.60 mmol, 1 equiv.) in THF (175 mL) was added TBAF (1M in THF, 15.2 mL, 15.2 mmol, 2 equiv.) at 0 °C. The resultant solution was then warmed to rt, after 40 min the reaction mixture was

hydrolysed with  $\text{NH}_4\text{Cl}$  (sat) (25 mL) and extracted with EtOAc ( $3 \times 25$  mL). The combined extracts were dried over  $\text{MgSO}_4$ , filtered and concentrated *in vacuo*. The crude material was passed through silica gel, eluting with 100% EtOAc, and used without further purification. To a solution of EDCi (1.80g, 9.43 mmol, 2 equiv.) in  $\text{CH}_2\text{Cl}_2$  (70 mL) was successively added triethylamine (1.31 mL, 9.43 mmol, 2 equiv.), DMAP (115 mg, 0.94 mmol, 20 mol%), phenylacetic acid (1.28g, 9.43 mmol, 2 equiv.) and crude propargylic alcohol (**S**)-**266**. After 3 hours at room temperature the resultant solution was washed with 10% citric acid ( $3 \times 10$  mL),  $\text{NaHCO}_3$  (sat) ( $3 \times 10$  mL) and brine (10 mL). The organic extract was then dried over  $\text{MgSO}_4$  and concentrated *in vacuo*. The crude mixture was then subjected to column chromatography, eluting with 4:1 Pet/EtOAc, to afford the title compound **S-1a** as a white solid (888 mg, 43% over two steps).

$$[\alpha]_{\text{D}}^{20} = -122 (c 1, \text{CHCl}_3)$$

All data as previously stated.

#### **N-Benzyl-4-methylbenzenesulfonamide**

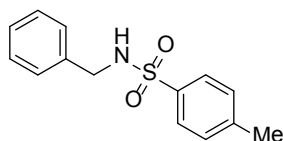

To benzylamine (10.4 mL, 96 mmol, 1 equiv.) and triethylamine (20 mL, 143 mmol, 1.5 equiv.) in  $\text{CH}_2\text{Cl}_2$  (500 mL), was added 4-methylbenzene-1-sulfonyl chloride (18.2 g, 96 mmol, 1 equiv.) in small portions. The reaction was allowed to stir at room temperature for 1 hour before being quenched by water (300 mL). The aqueous layer was extracted with dichloromethane ( $3 \times 200$  mL), then the organic extracts were combined, dried over  $\text{Na}_2\text{SO}_4$  and concentrated *in vacuo*. The residue was recrystallised ( $\text{CH}_2\text{Cl}_2$ /Petroleum ether) to afford **268** as a colourless crystals (25.0g, 99%).

$^1\text{H}$  NMR (300 MHz,  $(\text{CD}_3)_2\text{CO}$ )  $\delta_{\text{H}}$ : 7.67 (2H, app. d,  $J = 8.4$  Hz), 7.29 (2H, app. d,  $J = 8.4$  Hz), 7.21–7.07 (5H, m), 6.76 (1H, br. t,  $J = 6.5$  Hz), 4.00 (2H, d,  $J = 6.5$  Hz), 2.32 (3H, s);  $^{13}\text{C}$  NMR (75 MHz,  $\text{CDCl}_3$ )  $\delta_{\text{C}}$ : 144.2, 139.2, 139.0, 130.8, 129.6, 129.1, 128.5, 128.3, 48.1, 21.8.

All other data in accordance with literature precedence.<sup>193</sup>

***N*-Benzyl-*N*-(3-((*tert*-butyldiphenylsilyl)oxy)but-1-yn-1-yl)-4-methylbenzenesulfonamide**

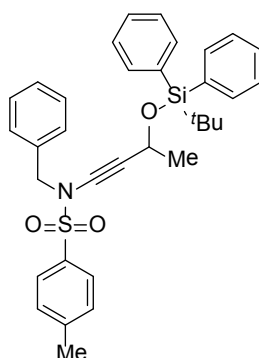

To a solution of *N*-benzyl-4-methylbenzenesulfonamide (962 mg, 3.68 mmol, 1 equiv.) in pyridine (16 mL) at 0 °C was added KHMDS (1M in THF, 3.68 mL, 3.68 mmol, 1 equiv.) over 4 minutes. The reaction was allowed to stir for 10 minutes before a solution of CuI (702 mg, 3.68 mmol, 1 equiv.) in pyridine (8 mL) was added. The reaction mixture was allowed to warm to room temperature and stirred for 2 hours. A solution of 4-bromobut-3-yn-2-yloxy)(*tert*-butyl)diphenylsilane (2.85 g, 7.37 mmol, 2 equiv.) in toluene (12 mL) was then added over 1 hour, with the resultant mixture being allowed to stir for 20 hours. The reaction was then diluted with Et<sub>2</sub>O (50 mL) and washed with 2:1 brine/concentrated NH<sub>4</sub>OH (3 x 50 mL). The combined aqueous washings were then extracted with Et<sub>2</sub>O (50 mL). The organic extracts were combined, dried with MgSO<sub>4</sub>, filtered and concentrated *in vacuo*. Purification was achieved by flash chromatography (8:1 Pet/EtOAc) to afford the title compound as a yellow oil (1.51g, 72%).

FTIR (thin film)  $\nu_{\max}$ : 3071, 2956, 2930, 2890, 2857, 2246, 1597; <sup>1</sup>H NMR (300 MHz, CDCl<sub>3</sub>)  $\delta_{\text{H}}$ : 7.72–7.50 (6H, m), 7.41–7.04 (13H, m), 4.45 (1H, q,  $J = 6.5$  Hz), 4.32 (1H, d,  $J = 13.6$  Hz), 4.20 (1H, d,  $J = 13.6$  Hz), 2.35 (3H, s), 1.25 (3H, d,  $J = 6.5$  Hz), 0.96 (9H, s); <sup>13</sup>C NMR (75 MHz, CDCl<sub>3</sub>)  $\delta_{\text{C}}$ : 144.5, 136.0, 135.8, 134.9, 133.8, 129.7, 128.7, 128.5, 128.2, 127.8, 127.7, 127.6, 77.6, 73.7, 60.2, 55.4, 26.9, 25.2, 21.7, 19.3; HRMS (ESI, +ve)  $m/z$ : calcd. for C<sub>34</sub>H<sub>38</sub>NOSSi: 568.2342, found: 568.2356 [M + Na]<sup>+</sup>.

### *N*-Benzyl-*N*-(3-hydroxybut-1-yn-1-yl)-4-methylbenzenesulfonamide

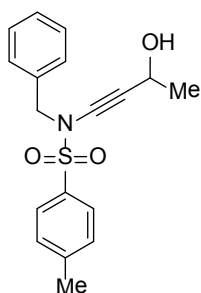

To a solution of *N*-benzyl-*N*-(3-((tert-butyldiphenylsilyl)oxy)but-1-yn-1-yl)-4-methylbenzenesulfonamide (1.51 g, 2.67 mmol, 1 equiv.) in THF (75 mL) was added TBAF (1M in THF, 5.34 mL, 5.34 mmol, 2 equiv.) at 0 °C. The resultant solution was then warmed to rt, after 40 min the reaction mixture was hydrolysed with NH<sub>4</sub>Cl (sat) (25 mL) and extracted with EtOAc (3 x 25 mL). The combined extracts were dried over MgSO<sub>4</sub>, filtered and concentrated *in vacuo*. The crude material was purified by rapid filtration through silica gel, eluting with 2:1 Pet/EtOAc, to give alcohol *N*-benzyl-*N*-(3-hydroxybut-1-yn-1-yl)-4-methylbenzenesulfonamide as a yellow oil (527 mg, 60%).

FTIR (film/cm<sup>-1</sup>)  $\nu_{\max}$ : 3375, 3035, 2983, 2930, 2245, 1596; <sup>1</sup>H NMR (300 MHz, CDCl<sub>3</sub>)  $\delta_{\text{H}}$ : 7.70–7.64 (2H, m), 7.35–7.15 (7H, m), 4.51–4.36 (3H, m), 2.36 (3H, s), 1.24 (3H, d,  $J = 6.7$  Hz); <sup>13</sup>C NMR (75 MHz, CDCl<sub>3</sub>)  $\delta_{\text{C}}$ : 144.7, 134.8, 134.6, 124.4, 129.7, 128.9, 128.5, 128.4, 127.7, 77.8, 73.5, 58.4, 55.4, 24.2, 21.6, 19.0; MS (ESI:+ve)  $m/z$ : calcd for C<sub>18</sub>H<sub>19</sub>NO<sub>3</sub>SNa: 352.0984, found: 352.1113 [M + Na<sup>+</sup>].

### 4-(*N*-Benzyl-4-methylphenylsulfonamido)but-3-yn-2-yl 2-phenylacetate (6)

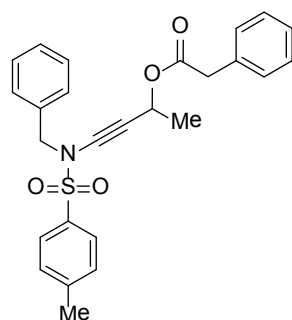

Prepared according to general procedure, using *N*-benzyl-*N*-(3-hydroxybut-1-yn-1-yl)-4-methylbenzenesulfonamide (527 mg, 1.60 mmol, 1 equiv.), phenylacetic acid (435 mg, 3.20 mmol, 2 equiv.), EDCi (613 mg, 3.20 mmol, 2 equiv.), NEt<sub>3</sub> (445  $\mu$ L, 3.20 mmol, 2 equiv.), DMAP (39 mg, 0.32



mmol, 20 mol%), CH<sub>2</sub>Cl<sub>2</sub> (75 mL). Purification was achieved by flash chromatography, eluting with 8:1 Pet/EtOAc, affording **6** as a yellow oil (489 mg, 68%).

FTIR (film/cm<sup>-1</sup>)  $\nu_{\max}$ : 3030, 2990, 2246, 1736, 1597; <sup>1</sup>H NMR (300 MHz, CDCl<sub>3</sub>)  $\delta_{\text{H}}$ : 7.72 (2H, app. d,  $J = 8.5$  Hz), 7.36–7.17 (12H, m), 5.47 (1H, q,  $J = 6.6$  Hz), 4.51 (1H, d,  $J = 14.3$  Hz), 4.40 (1H, d,  $J = 14.3$  Hz), 3.57 (2H, s), 2.43 (3H, s), 1.36 (3H, d,  $J = 6.6$  Hz); <sup>13</sup>C NMR (75 MHz, CDCl<sub>3</sub>)  $\delta_{\text{C}}$ : 170.4, 144.6, 134.5, 134.3, 133.8, 129.7, 129.2, 128.9, 128.6, 128.5, 128.3, 127.8, 127.1, 78.8, 70.6, 61.2, 55.4, 41.2, 21.7, 21.1; MS (ESI:+ve)  $m/z$ : calcd for C<sub>26</sub>H<sub>25</sub>NO<sub>4</sub>SNa: 470.1402, found:470.1432 [M + Na<sup>+</sup>].

### (*E*)-*N*-Benzyl-*N*-tosylbut-2-enamide (*E*-7)

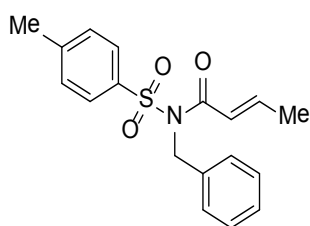

Prepared according to general procedure, using **6** (100 mg, 0.22 mmol, 1 equiv.), AuCl(PPh<sub>3</sub>) (5.4 mg, 0.01 mmol, 5 mol%), AgPF<sub>6</sub> (2.8 mg, 0.01 mmol, 5 mol%) and CH<sub>2</sub>Cl<sub>2</sub> (4 mL). Purification by flash chromatography afforded *E*-7 as a light orange oil (70 mg, 95%, 6:1 *E/Z*).

FTIR (film/cm<sup>-1</sup>)  $\nu_{\max}$ : 3031, 2974, 1708, 1683, 1635, 1597; <sup>1</sup>H NMR (500 MHz, CDCl<sub>3</sub>)  $\delta_{\text{H}}$  Major isomer: 7.70–7.65 (2H, m), 7.44–7.28 (7H, m), 7.00 (1H, dq,  $J = 15.0, 7.0$  Hz), 6.63 (1H, dq,  $J = 15.0, 7.0$  Hz), 5.13 (2H, s), 2.44 (3H, s), 1.85 (3H, dd,  $J = 7.0, 1.7$  Hz);  $\delta_{\text{H}}$  Minor isomer: 7.70–7.65 (2H, m), 7.44–7.28 (7H, m), 6.40 (1H, dq,  $J = 11.6, 7.0$  Hz), 6.21 (1H, dq,  $J = 11.6, 7.0$  Hz), 5.13 (2H, s), 2.44 (3H, s), 1.90 (3H, dd,  $J = 7.0, 1.7$  Hz); <sup>13</sup>C NMR (75 MHz, CDCl<sub>3</sub>)  $\delta_{\text{C}}$  Major isomer: 177.6, 166.0, 146.7, 144.7, 136.8, 133.7, 129.6, 129.4, 128.7, 127.8, 122.9, 41.1, 21.5, 18.5;  $\delta_{\text{C}}$  Minor isomer: 177.6, 166.0, 146.5, 144.7, 136.8, 133.7, 129.6, 129.3, 128.7, 127.8, 122.0, 41.1, 21.6, 15.8; MS (ESI:+ve)  $m/z$ : calcd for C<sub>18</sub>H<sub>19</sub>NO<sub>3</sub>SNa: 352.0984, found: 352.1095, [M + Na]<sup>+</sup>.

# <sup>1</sup>H and <sup>13</sup>C NMR Spectra

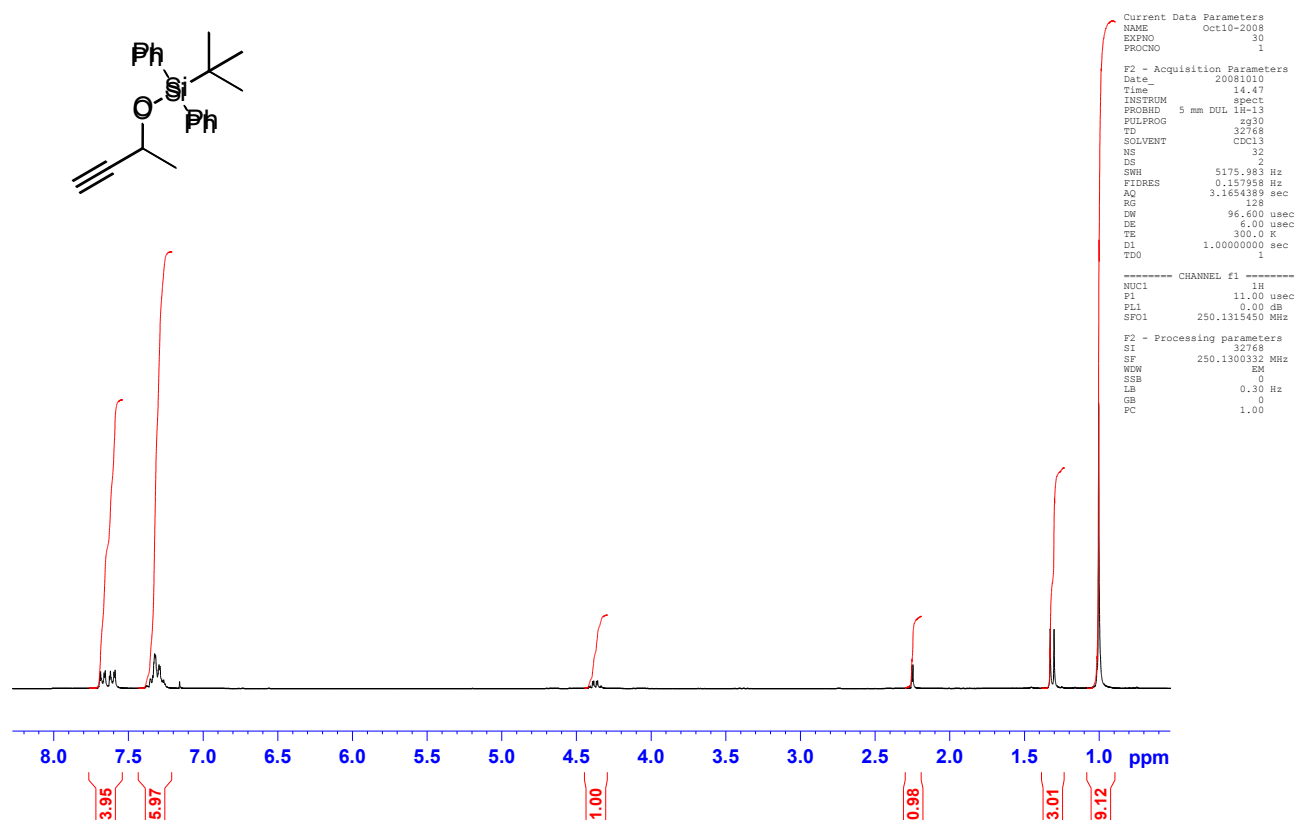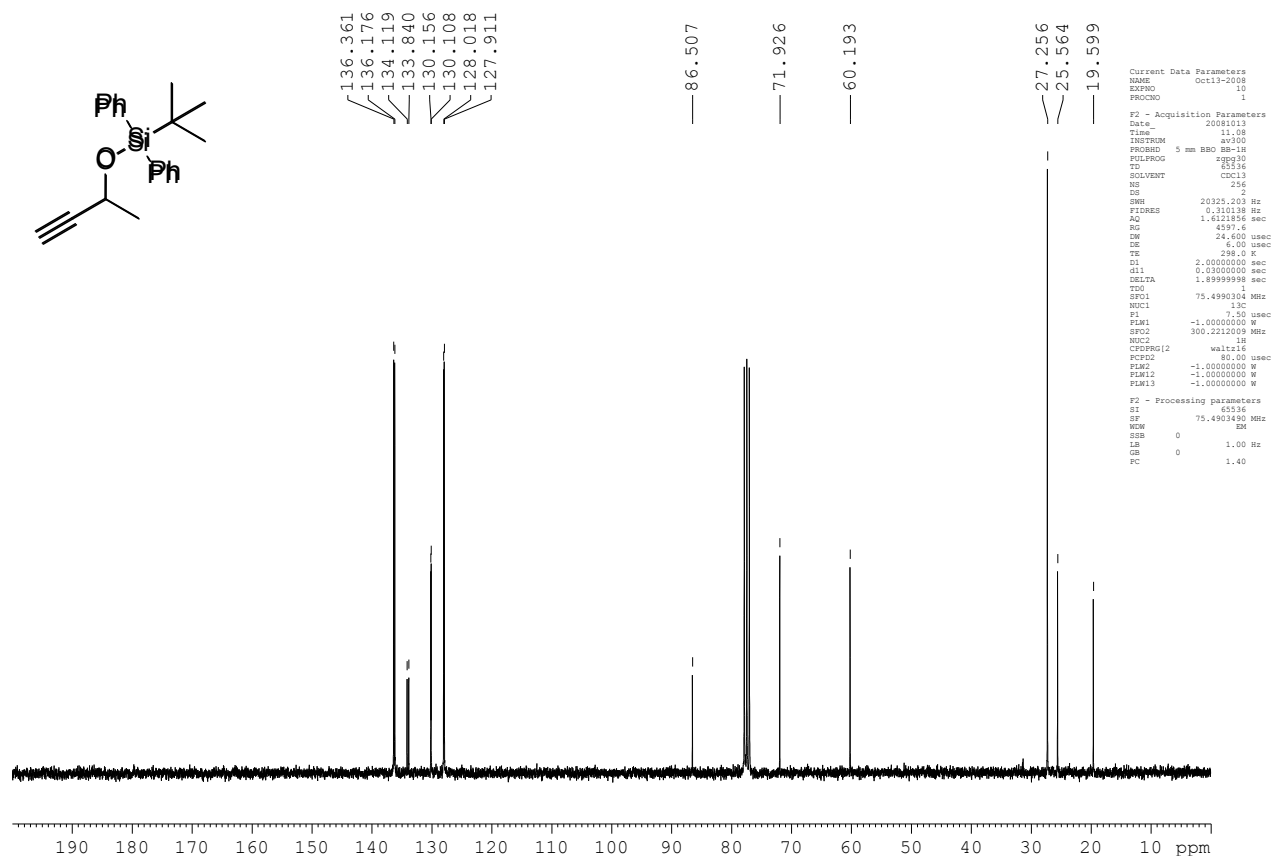

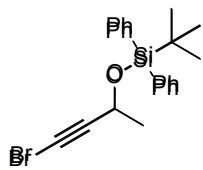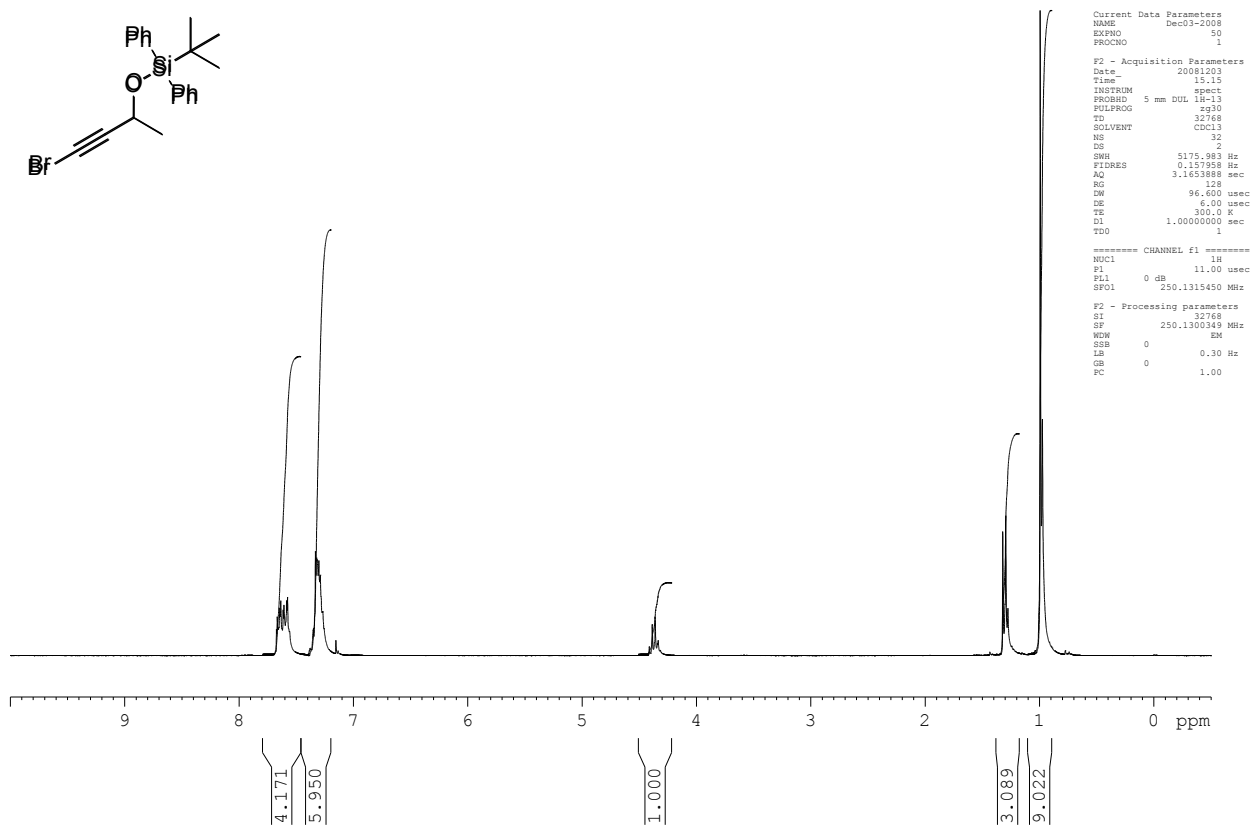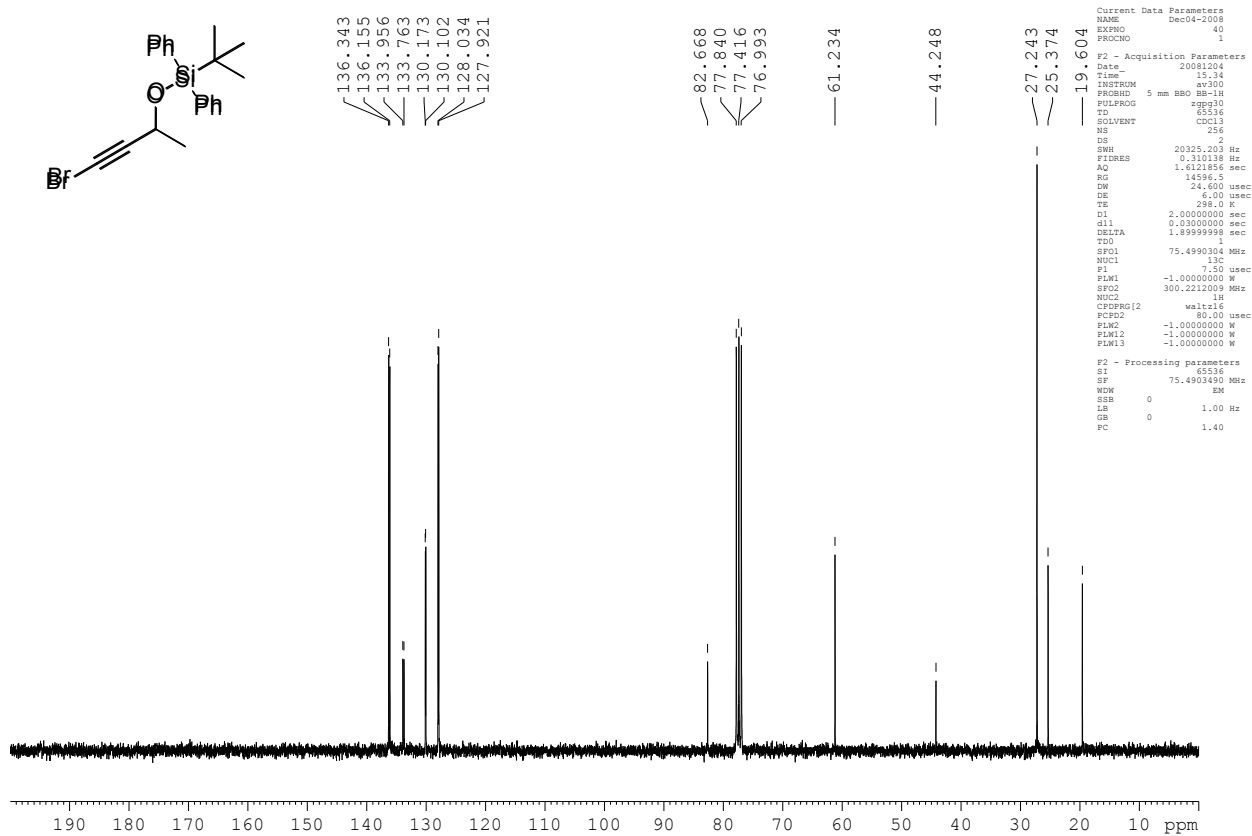

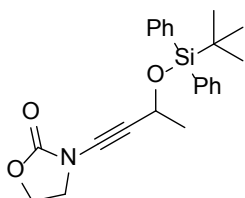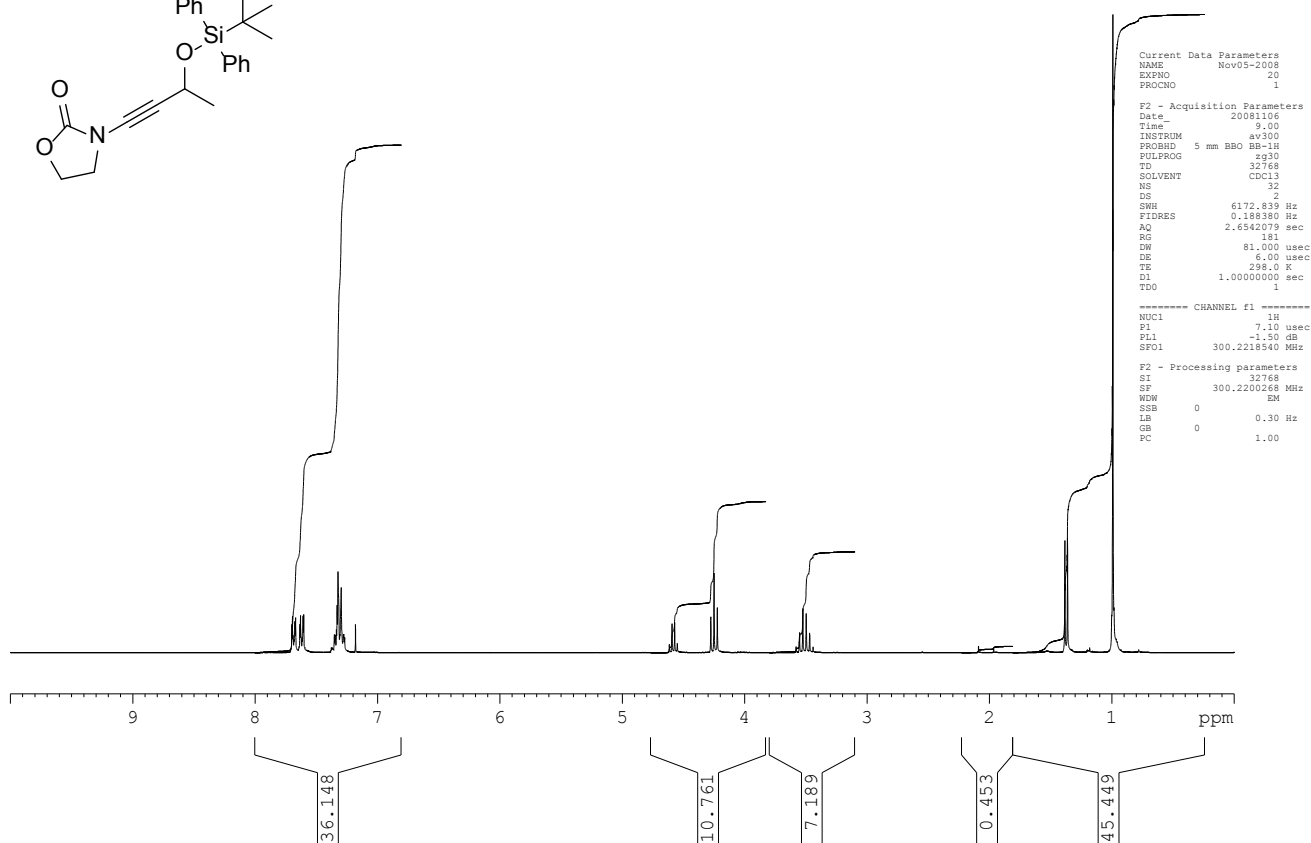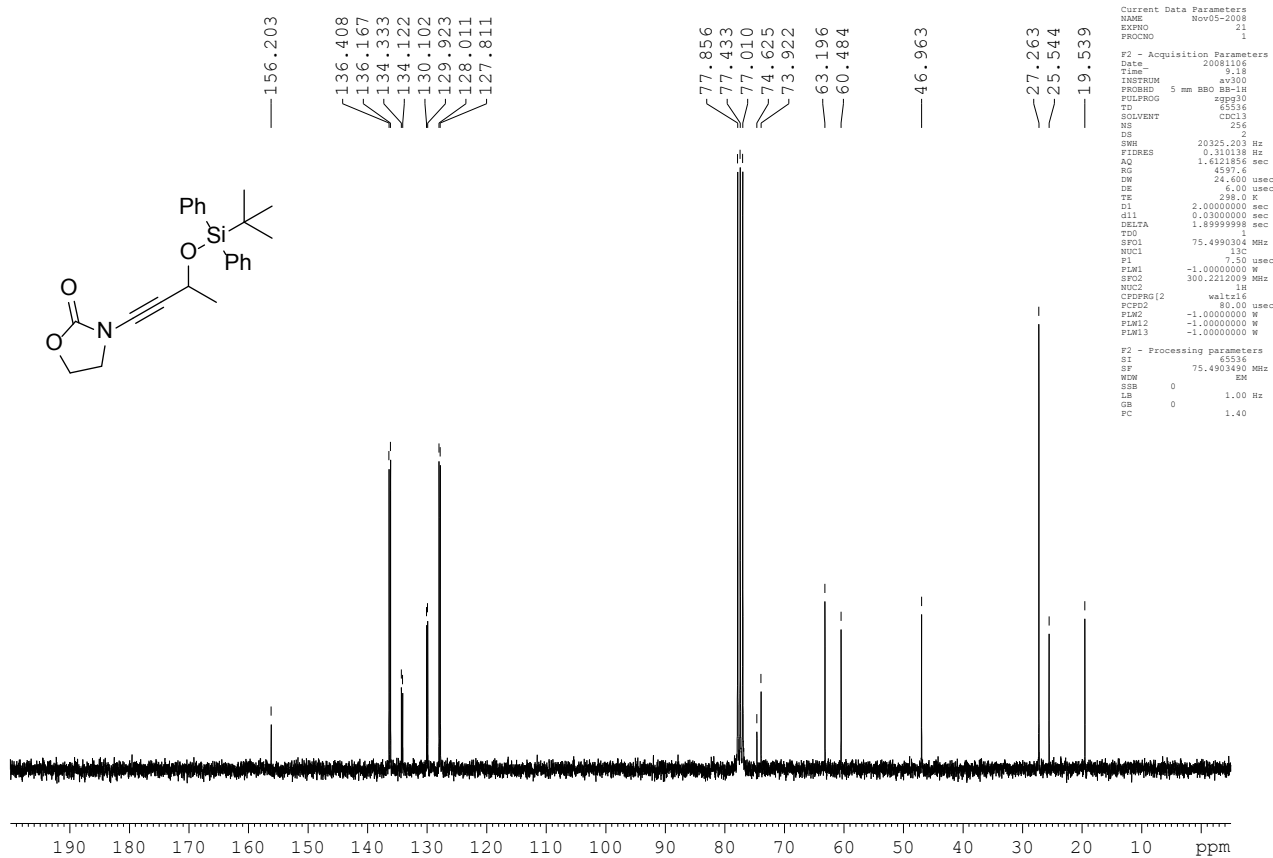

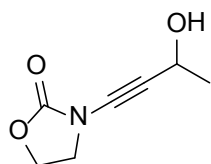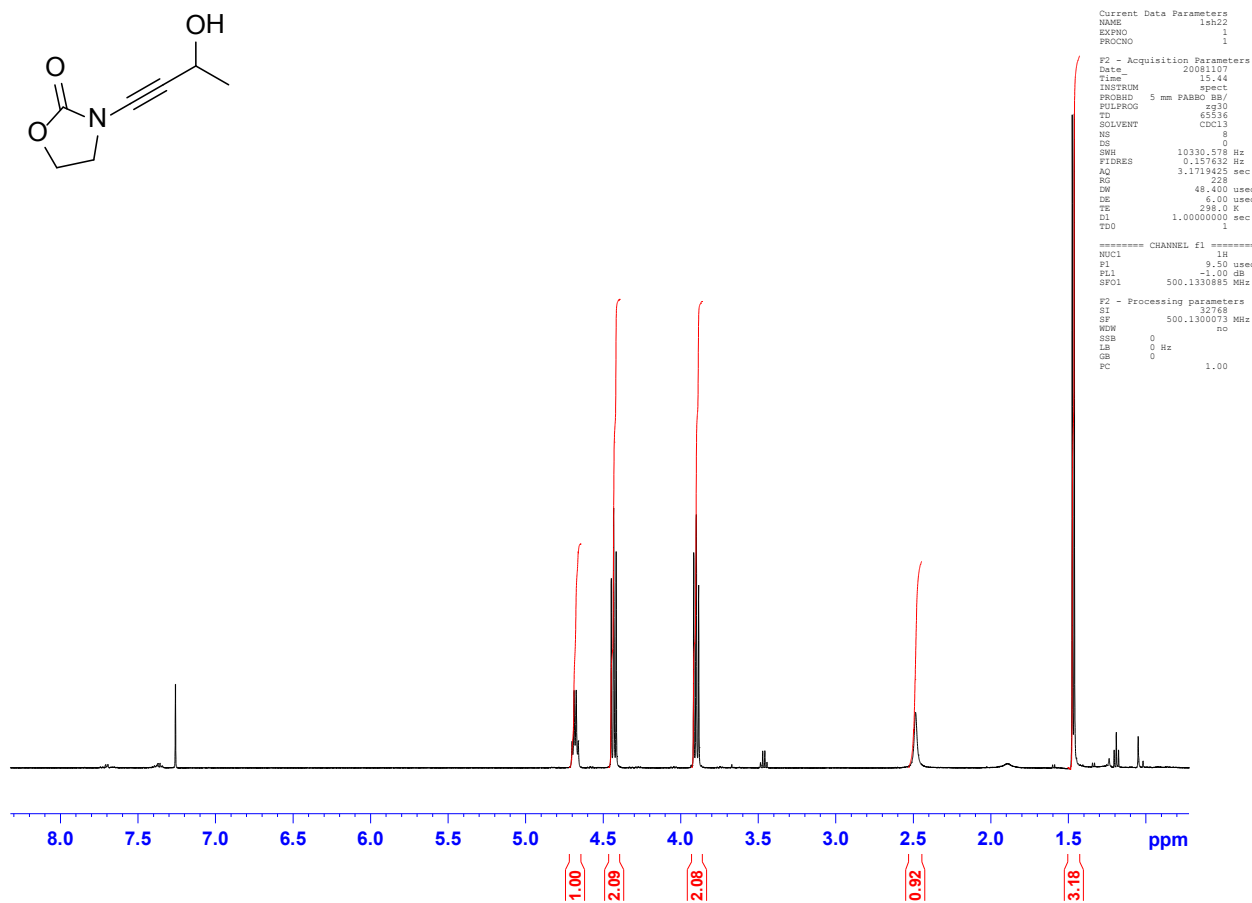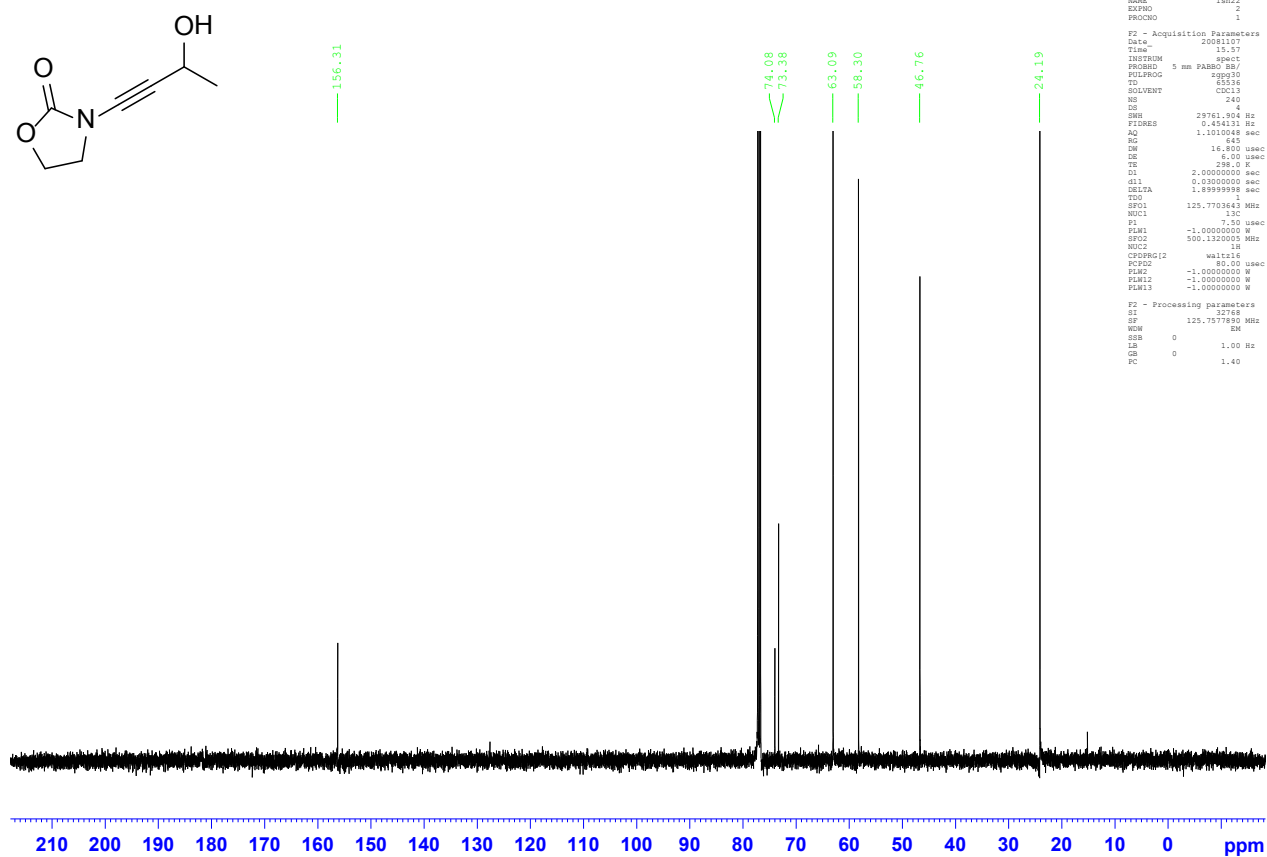



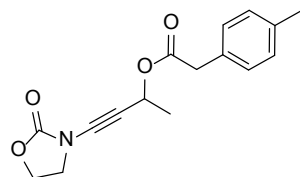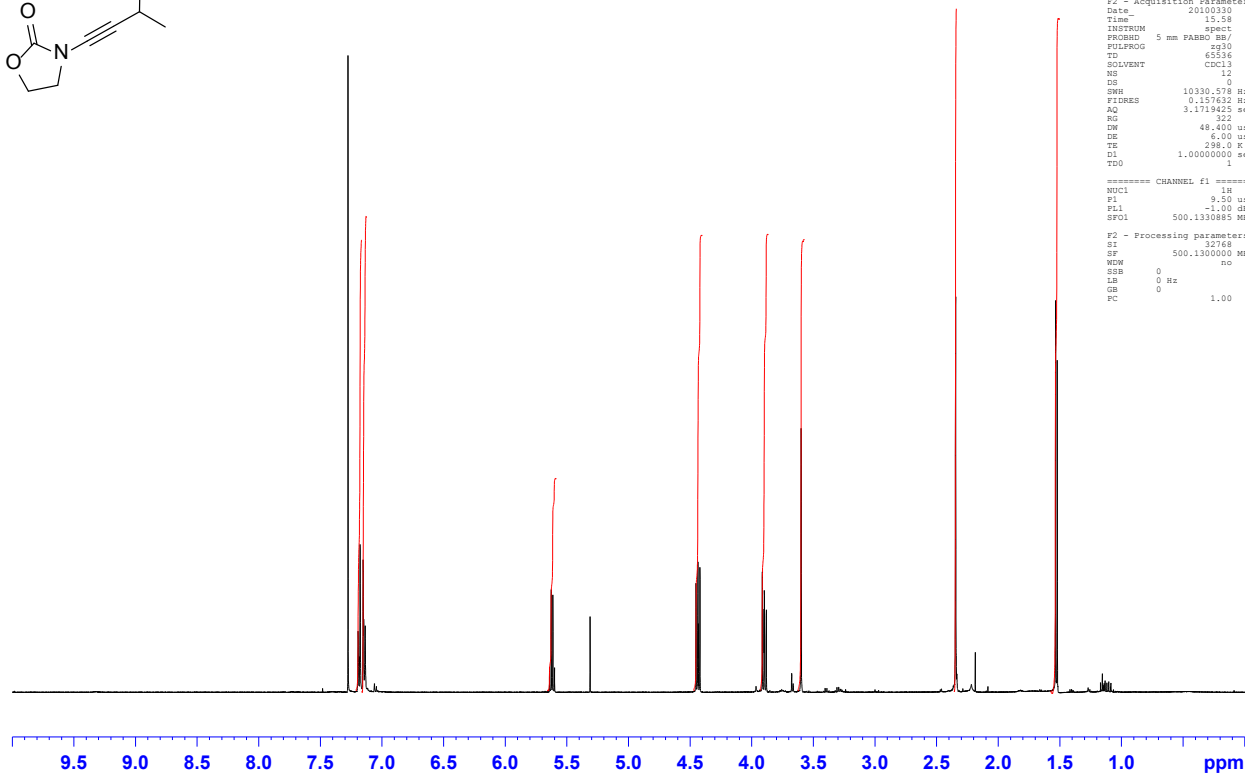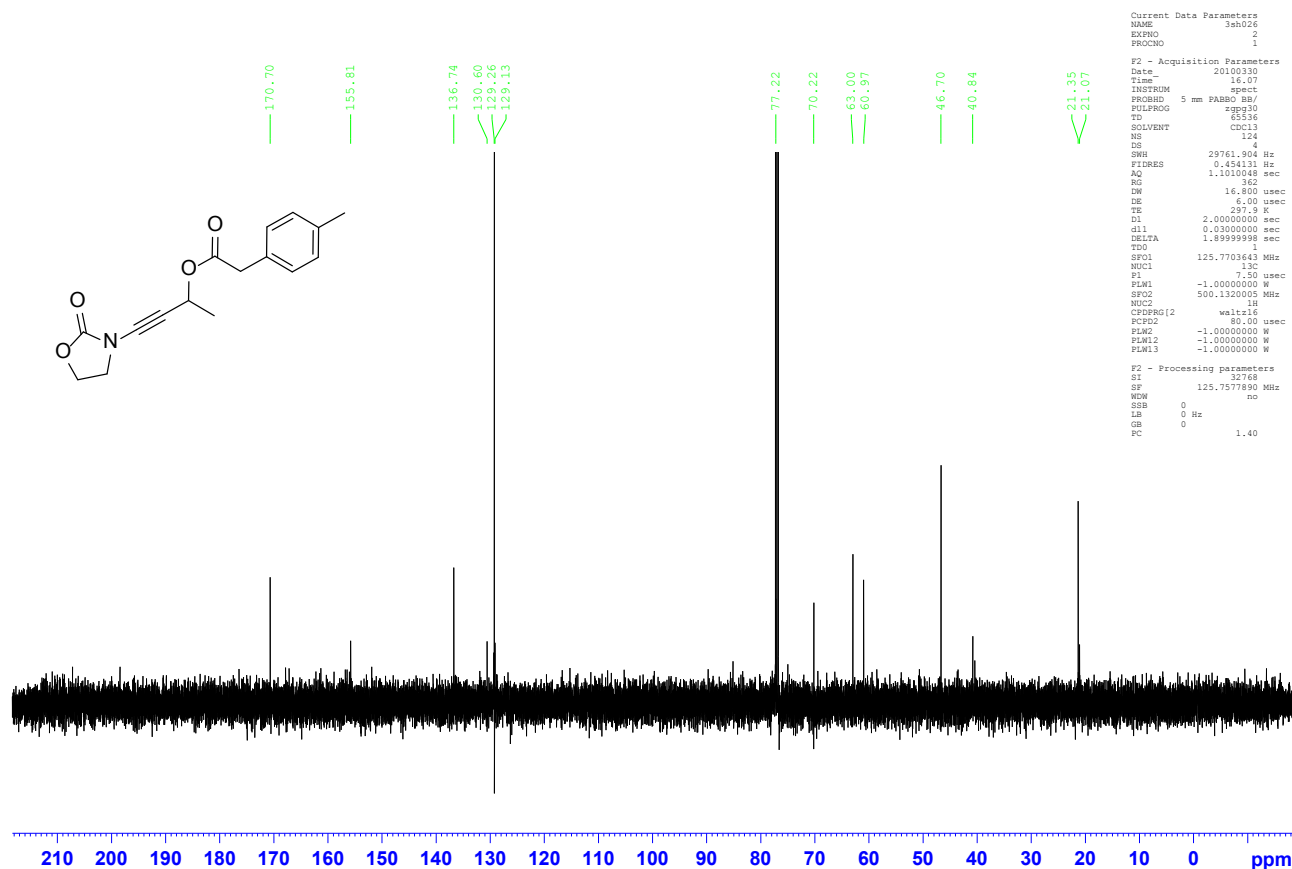

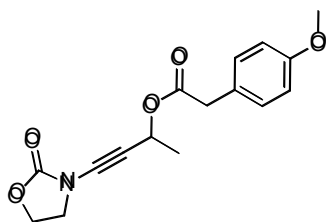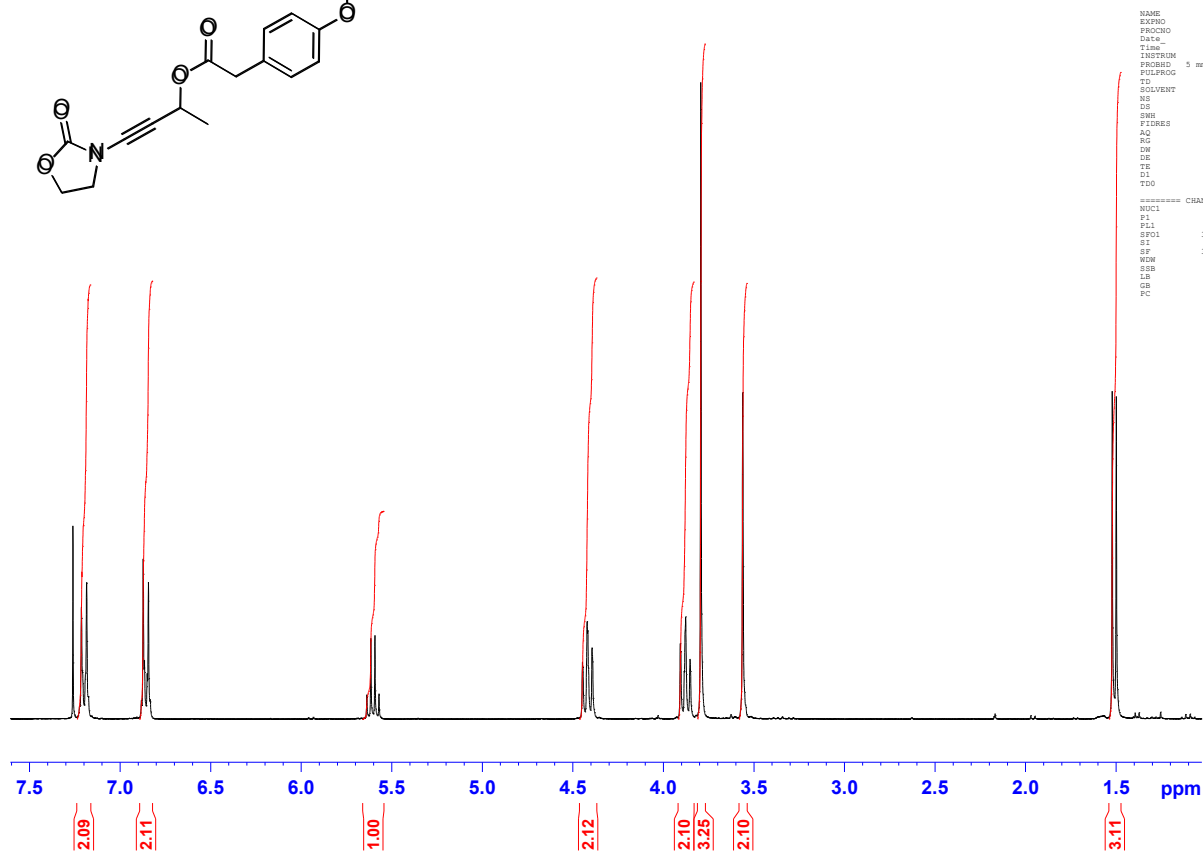

```

NAME      Aug19-2009
EXPNO    30
PROCNO   1
Date_    20090819
Time     12:27
INSTRUM  av300
PROBHD   5 mm BBO BB-1H
PULPROG  zgpg30
TD        32768
SOLVENT  CDCl3
NS        2
DS        2
SWH       6172.839 Hz
FIDRES   0.188880 Hz
AQ        2.6542580 sec
RG        512
DW        81.000 usec
DE        6.00 usec
TE        298.0 K
D1        1.00000000 sec
D11       0
D12       0
D13       0
D14       0
D15       0
D16       0
D17       0
D18       0
D19       0
D20       0
D21       0
D22       0
D23       0
D24       0
D25       0
D26       0
D27       0
D28       0
D29       0
D30       0
===== CHANNEL f1 =====
NUC1      1H
P1        7.10 usec
PL1       -1.00 dB
SFO1     300.2218340 MHz
SF        300.2210000 MHz
WDW       EM
SSB       0
LB        0.30 Hz
GB        0
PC        1.00
    
```

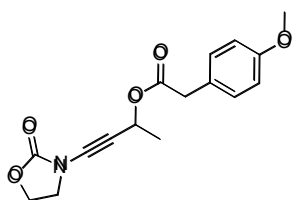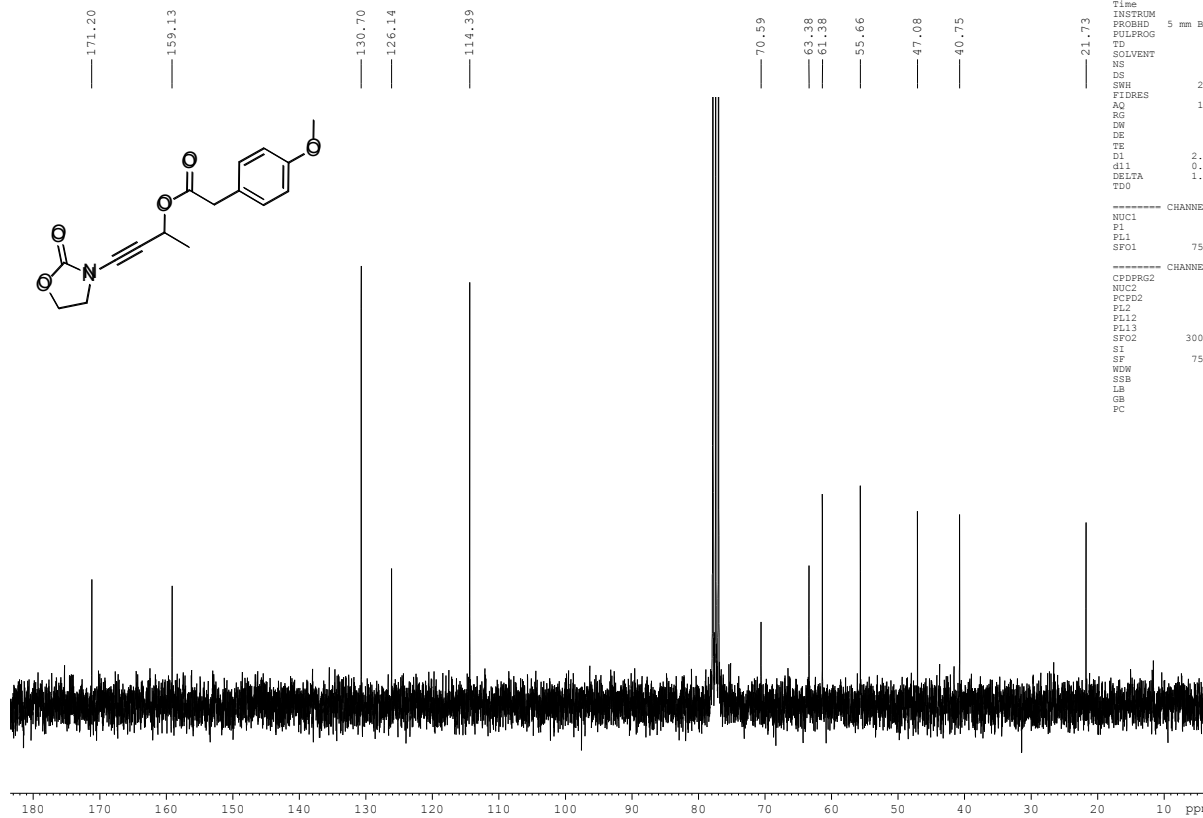

```

NAME      Aug19-2009
EXPNO    31
PROCNO   1
Date_    20090819
Time     12:45
INSTRUM  av300
PROBHD   5 mm BBO BB-1H
PULPROG  zgpg30
TD        65536
SOLVENT  CDCl3
NS        256
DS        2
SWH       20325.203 Hz
FIDRES   0.310138 Hz
AQ        1.6122355 sec
RG        4597.6
DW        24.600 usec
DE        6.00 usec
TE        298.0 K
D1        2.00000000 sec
d11       0.03000000 sec
d12       0.03000000 sec
d13       0.03000000 sec
d14       0.03000000 sec
d15       0.03000000 sec
d16       0.03000000 sec
d17       0.03000000 sec
d18       0.03000000 sec
d19       0.03000000 sec
d20       0.03000000 sec
d21       0.03000000 sec
d22       0.03000000 sec
d23       0.03000000 sec
d24       0.03000000 sec
d25       0.03000000 sec
d26       0.03000000 sec
d27       0.03000000 sec
d28       0.03000000 sec
d29       0.03000000 sec
d30       0.03000000 sec
===== CHANNEL f1 =====
NUC1      13C
P1        7.50 usec
PL1       4.00 dB
SFO1     75.4990304 MHz
===== CHANNEL f2 =====
CPDPRG2  waltz16
NUC2      1H
PCPD2    80.00 usec
PL2       1.50 dB
PL12     19.54 dB
PL13     22.00 dB
SFO2     300.2210000 MHz
SI        65536
SF        75.4903490 MHz
WDW       EM
SSB       0
LB        1.00 Hz
GB        0
PC        1.40
    
```



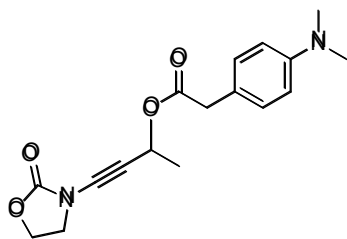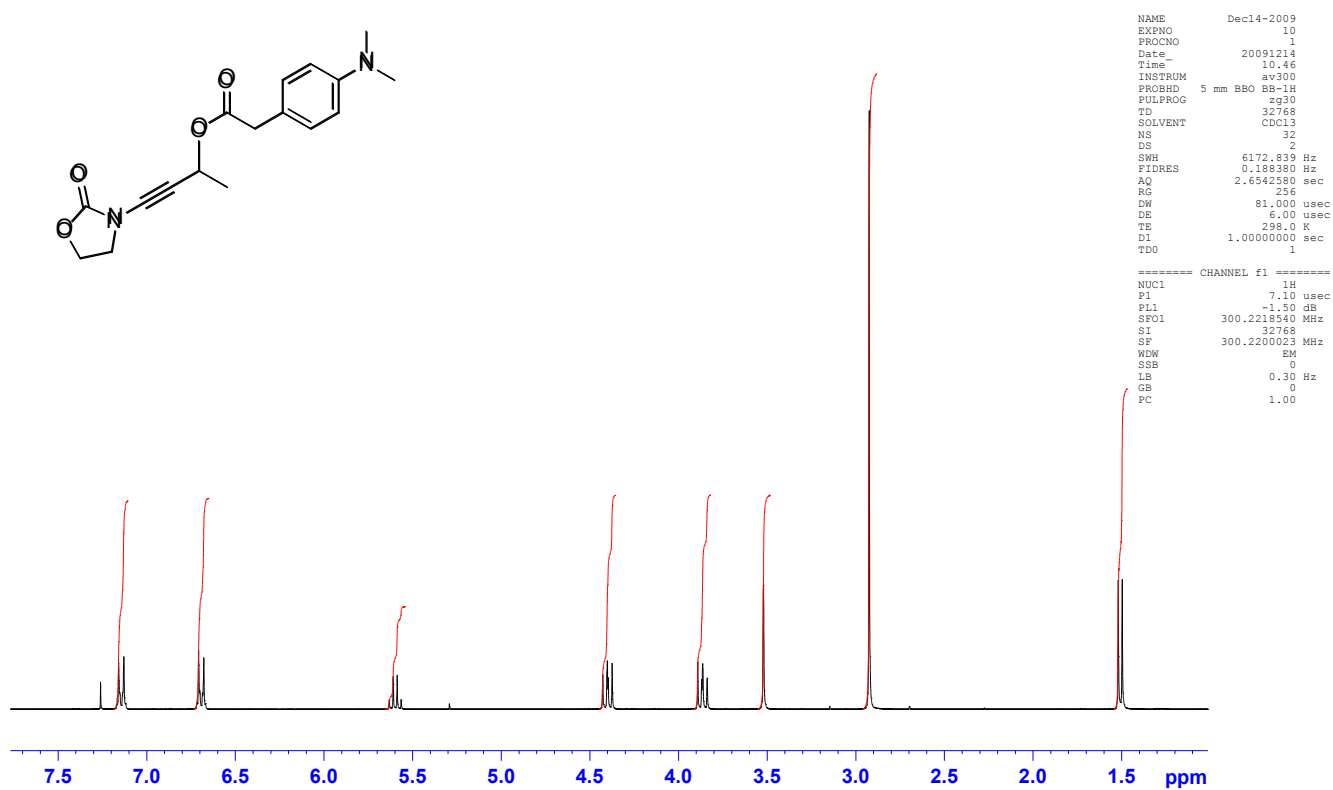

```

NAME      Dec14-2009
EXPNO     10
PROCNO    1
Date_     20091214
Time      10.46
INSTRUM   av300
PROBHD    5 mm BBO BB-1H
PULPROG   zg30
TD         32768
SOLVENT   CDCl3
NS         32
DS         2
SWH        6172.839 Hz
FIDRES     0.188380 Hz
AQ         2.6542380 sec
RG         256
DW         81.000 usec
DE         6.00 usec
TE         298.0 K
D1         1.00000000 sec
TDO        1
    
```

===== CHANNEL f1 =====

```

NUC1       1H
P1         7.10 usec
PL1        -1.50 dB
SFO1       300.2218540 MHz
SI         32768
SF         300.2200023 MHz
WDW        EM
SSB        0
LB         0.30 Hz
GB         1.00
PC         1.00
    
```

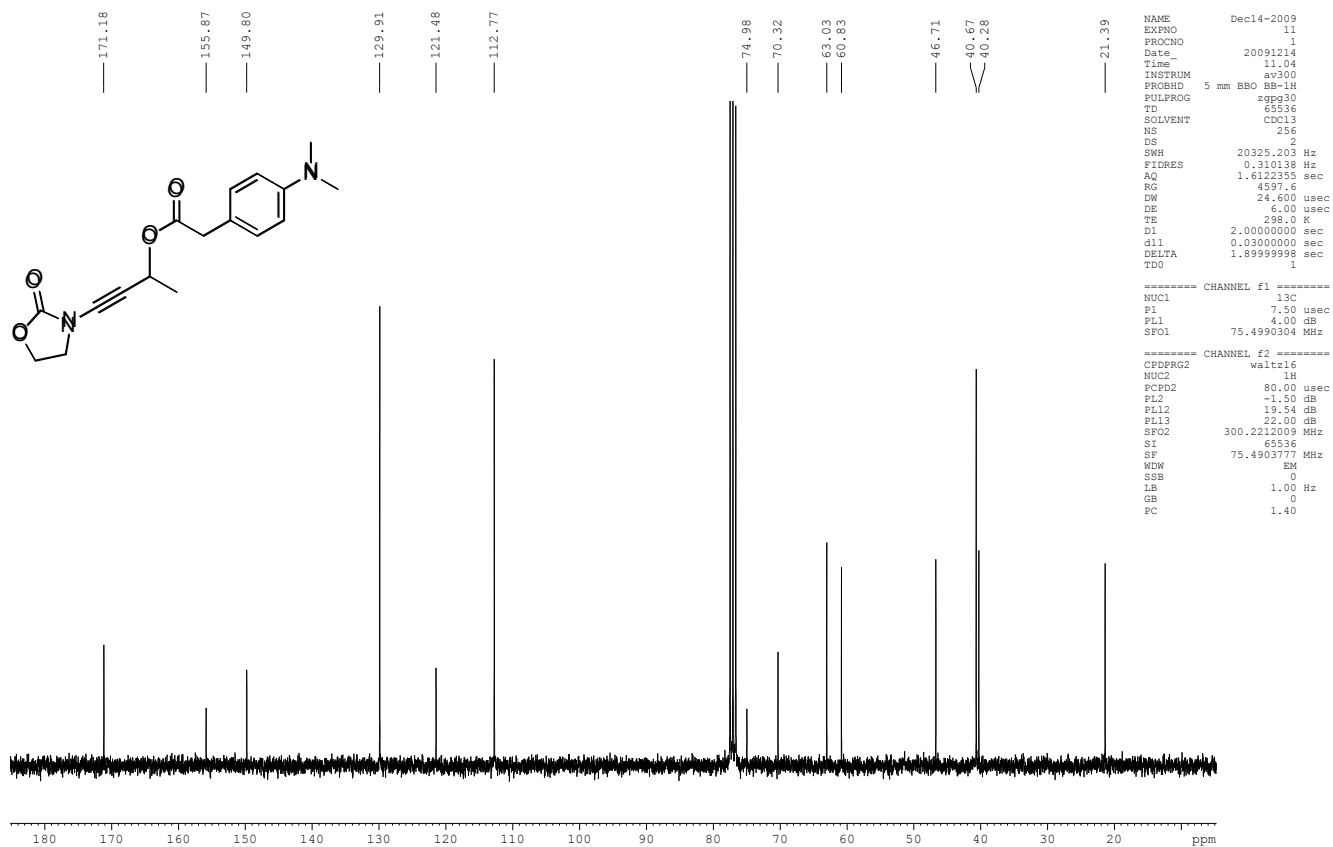

```

NAME      Dec14-2009
EXPNO     11
PROCNO    1
Date_     20091214
Time      11.04
INSTRUM   av300
PROBHD    5 mm BBO BB-1H
PULPROG   zgpg30
TD         65536
SOLVENT   CDCl3
NS         256
DS         2
SWH        20325.203 Hz
FIDRES     0.310138 Hz
AQ         1.6122353 sec
RG         4597.6
DW         24.600 usec
DE         6.00 usec
TE         298.0 K
D1         2.00000000 sec
d11        0.03000000 sec
DELTA      1.89999998 sec
TDO        1
    
```

===== CHANNEL f1 =====

```

NUC1       13C
P1         7.50 usec
PL1         4.00 dB
SFO1       75.4990304 MHz
    
```

===== CHANNEL f2 =====

```

CPDPRG2   waitz16
NUC2       1H
PCPB2     80.00 usec
PL2        -1.50 dB
PLI2      19.54 dB
PLI3      22.00 dB
SFO2       300.2212009 MHz
SI         65536
SF         75.4903777 MHz
WDW        EM
SSB        0
LB         1.00 Hz
GB         1.40
PC         1.40
    
```

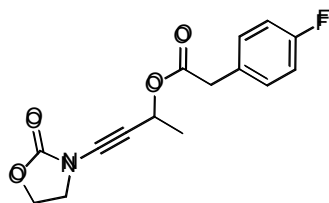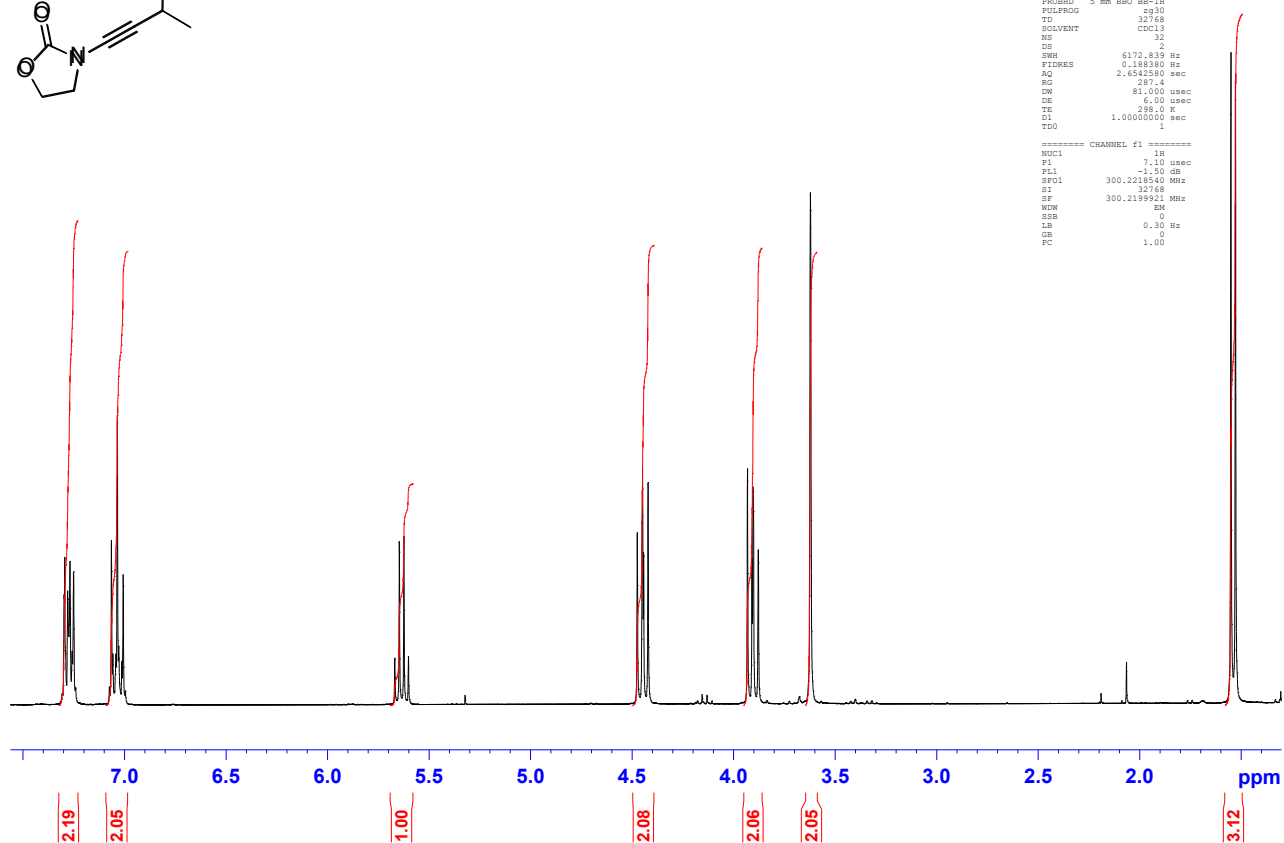

```

NAME      Dec14-2009
EXPNO     20
PROCNO    1
Date_     20091214
Time      11.13
INSTRUM   av300
PROBHD    5 mm BBO BB-1H
PULPROG   zgpg30
TD         32768
SOLVENT   CDCl3
NS         32
DS         2
SWH        6172.839 Hz
FIDRES     0.188380 Hz
AQ         2.6542380 sec
RG         287.4
DM         81.000 usec
DE         6.00 usec
TE         298.0 K
D1         1.00000000 sec
TDO        1
===== CHANNEL F1 =====
NUC1       1H
P1         7.10 usec
PL1        -1.50 dB
SFO1       300.2218540 MHz
SI         32768
SF         300.2199921 MHz
WDW        EM
SSB        0
LB         0.30 Hz
GB         0
PC         1.00
    
```

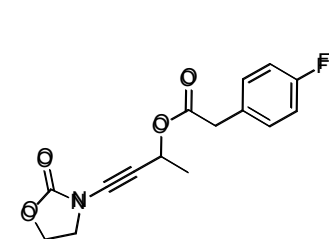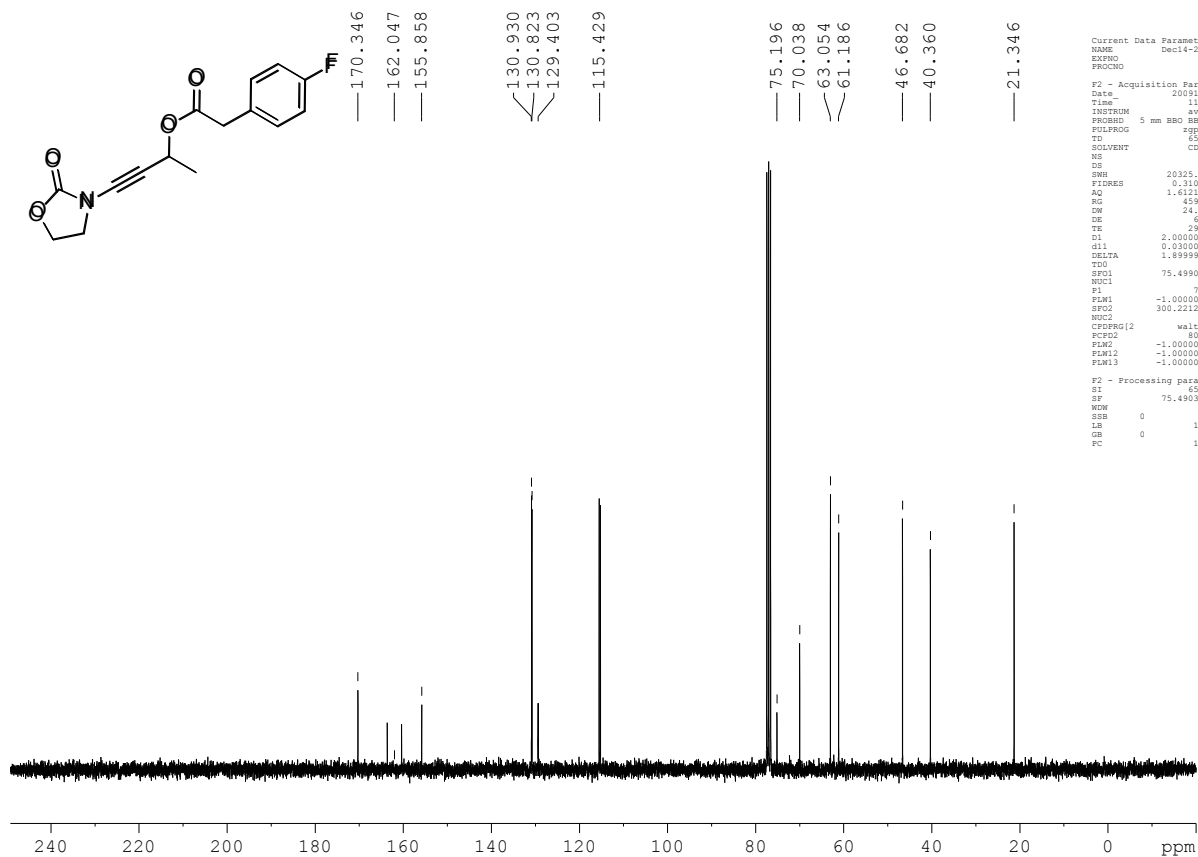

```

Current Data Parameters
NAME      Dec14-2009
EXPNO     21
PROCNO    1
F2 - Acquisition Parameters
Date_     20091214
Time      11.31
INSTRUM   av300
PROBHD    5 mm BBO BB-1H
PULPROG   zgpg30
TD         65536
SOLVENT   CDCl3
NS         256
DS         2
SWH        20325.203 Hz
FIDRES     0.310138 Hz
AQ         1.6121856 sec
RG         4597.6
DM         24.600 usec
DE         6.00 usec
TE         298.0 K
D1         2.00000000 sec
d11        0.03000000 sec
DELTA      1.49999998 sec
TDO        1
SFO1       75.4999041 MHz
NUC1       13C
P1         7.50 usec
PL1        -1.00000000 W
PLM1       300.2212009 MHz
NUC2       1H
CPDPRG2   waltz16
PCPD2      80.00 usec
PLM2       -1.00000000 W
PLM12      -1.00000000 W
PLM13      -1.00000000 W
F2 - Processing parameters
SI         65536
SF         75.4993777 MHz
WDW        EM
SSB        0
LB         1.00 Hz
GB         0
PC         1.40
    
```



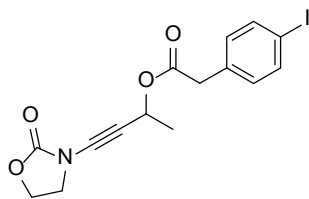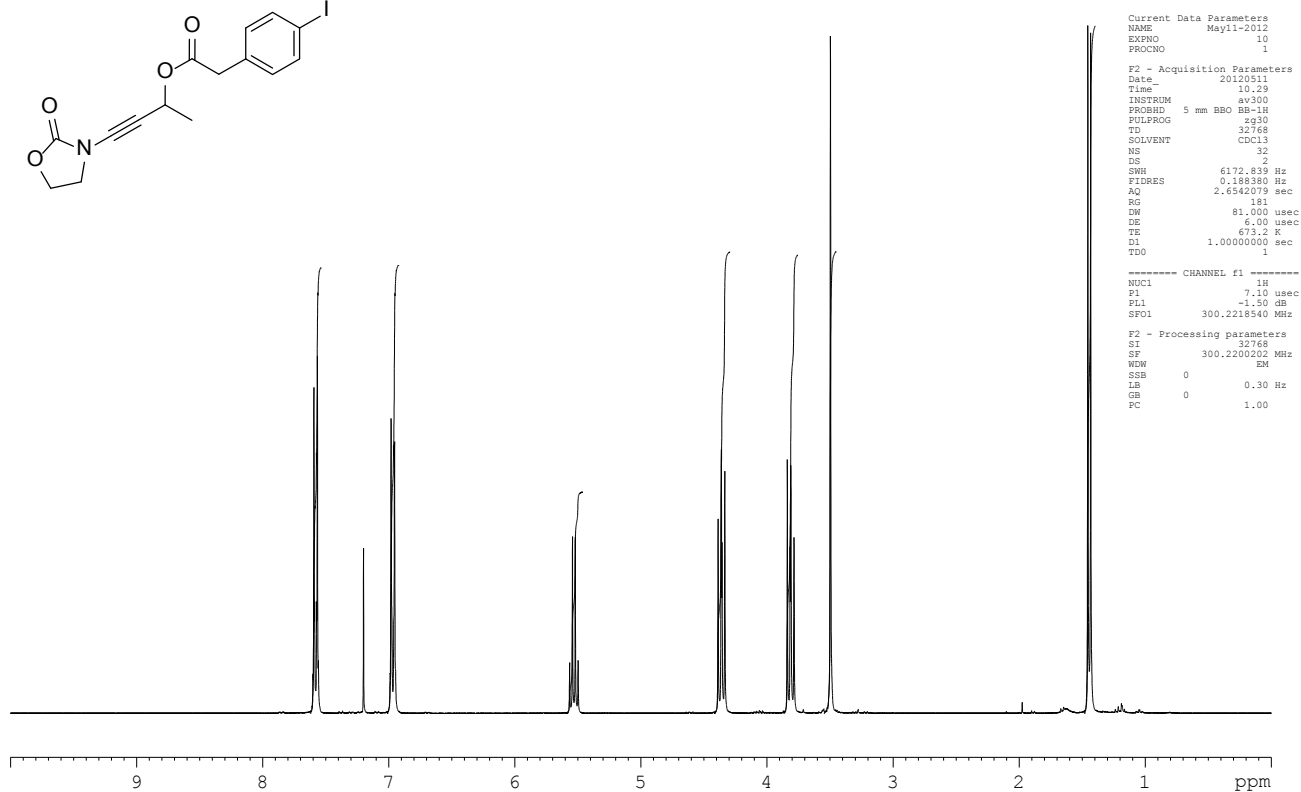

2.015 2.026 1.000 2.085 2.073 2.089 3.108

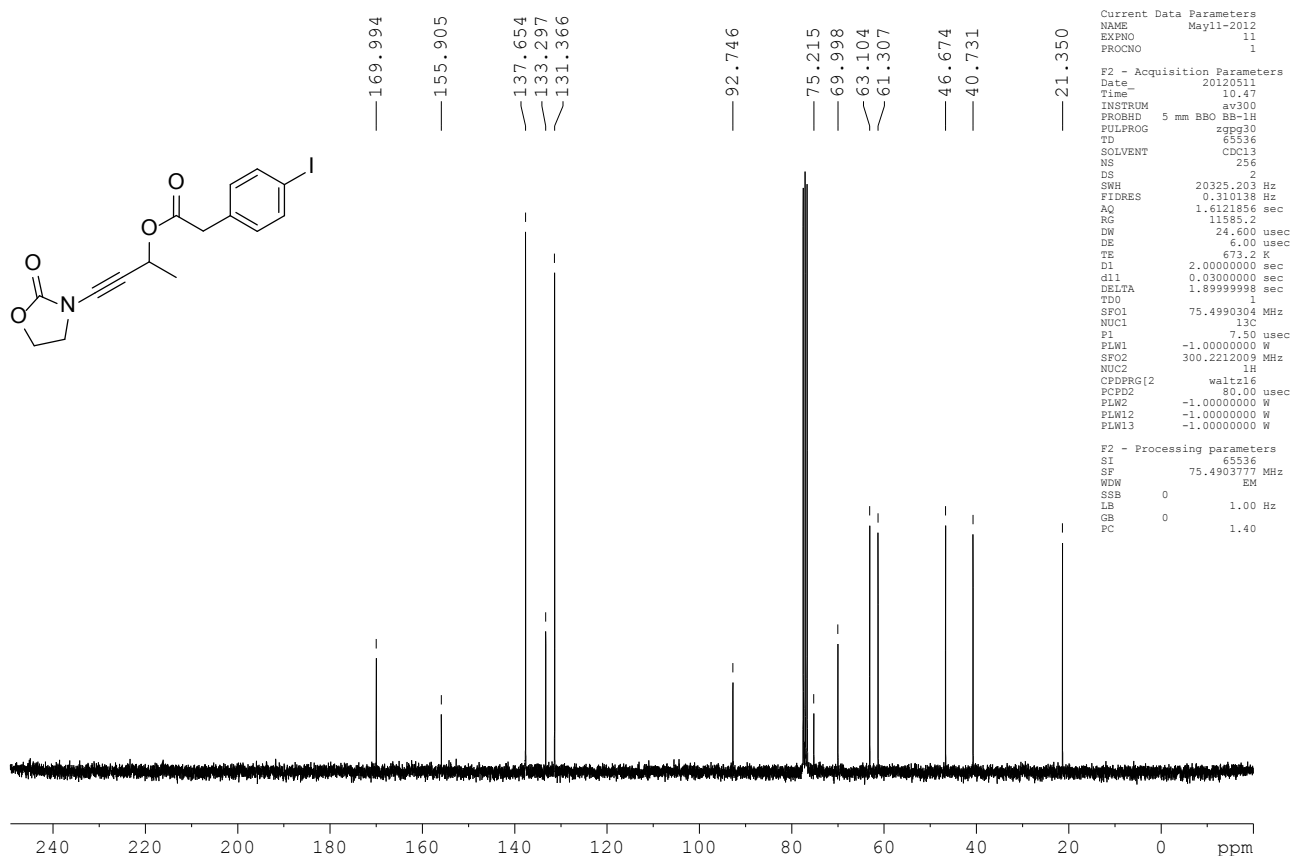

169.994 155.905 137.654 133.297 131.366 92.746 75.215 69.998 63.104 61.307 46.674 40.731 21.350

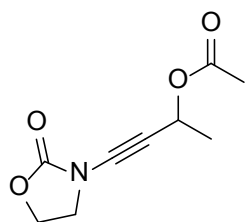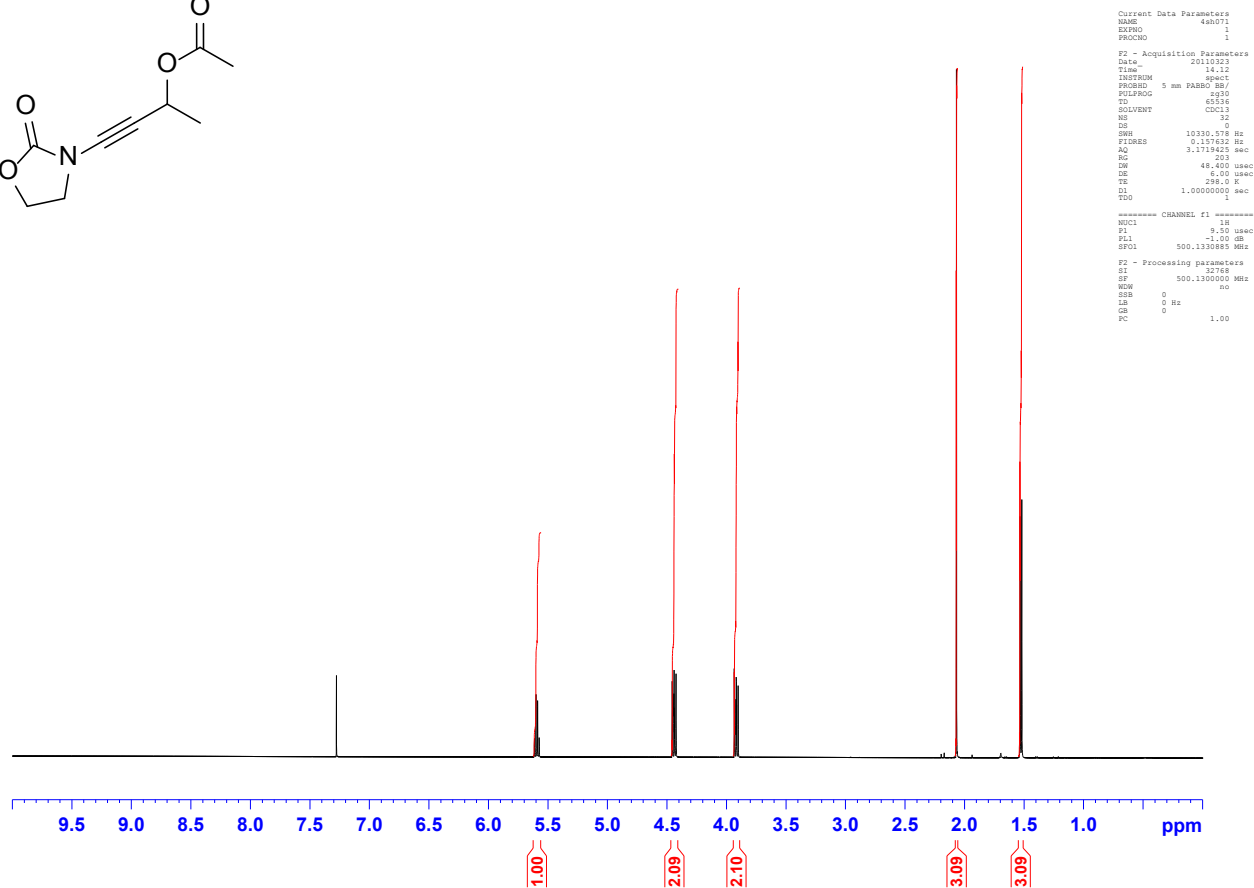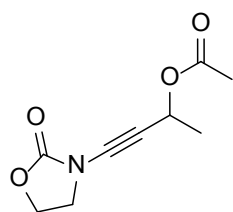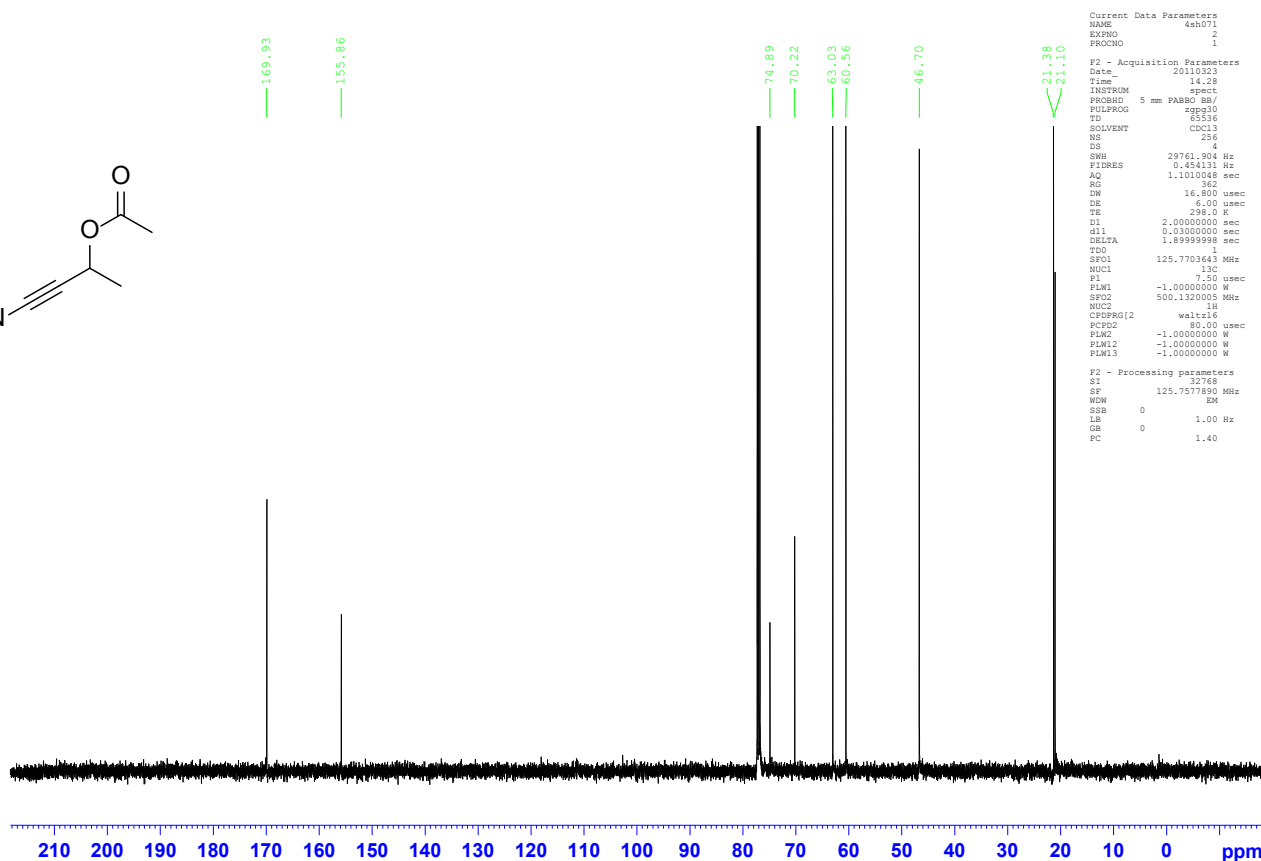

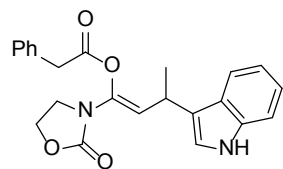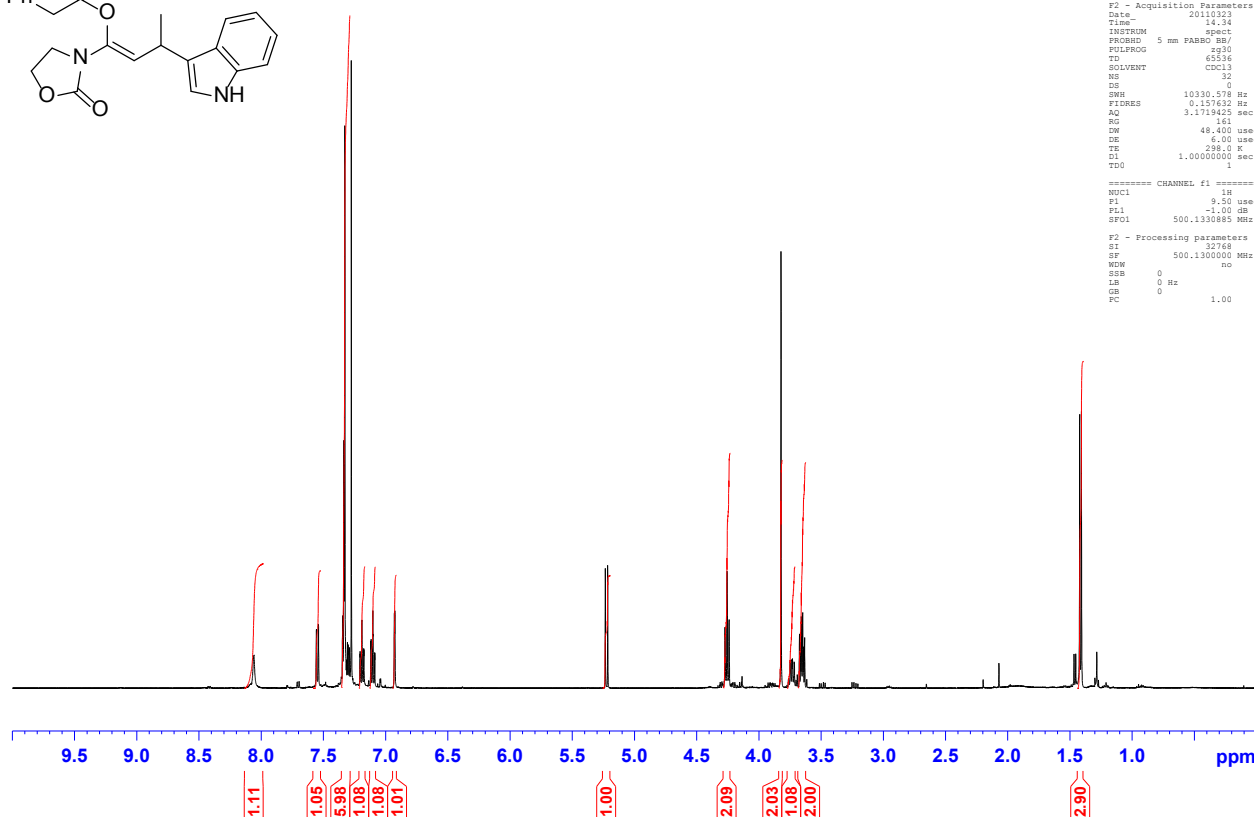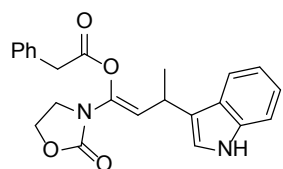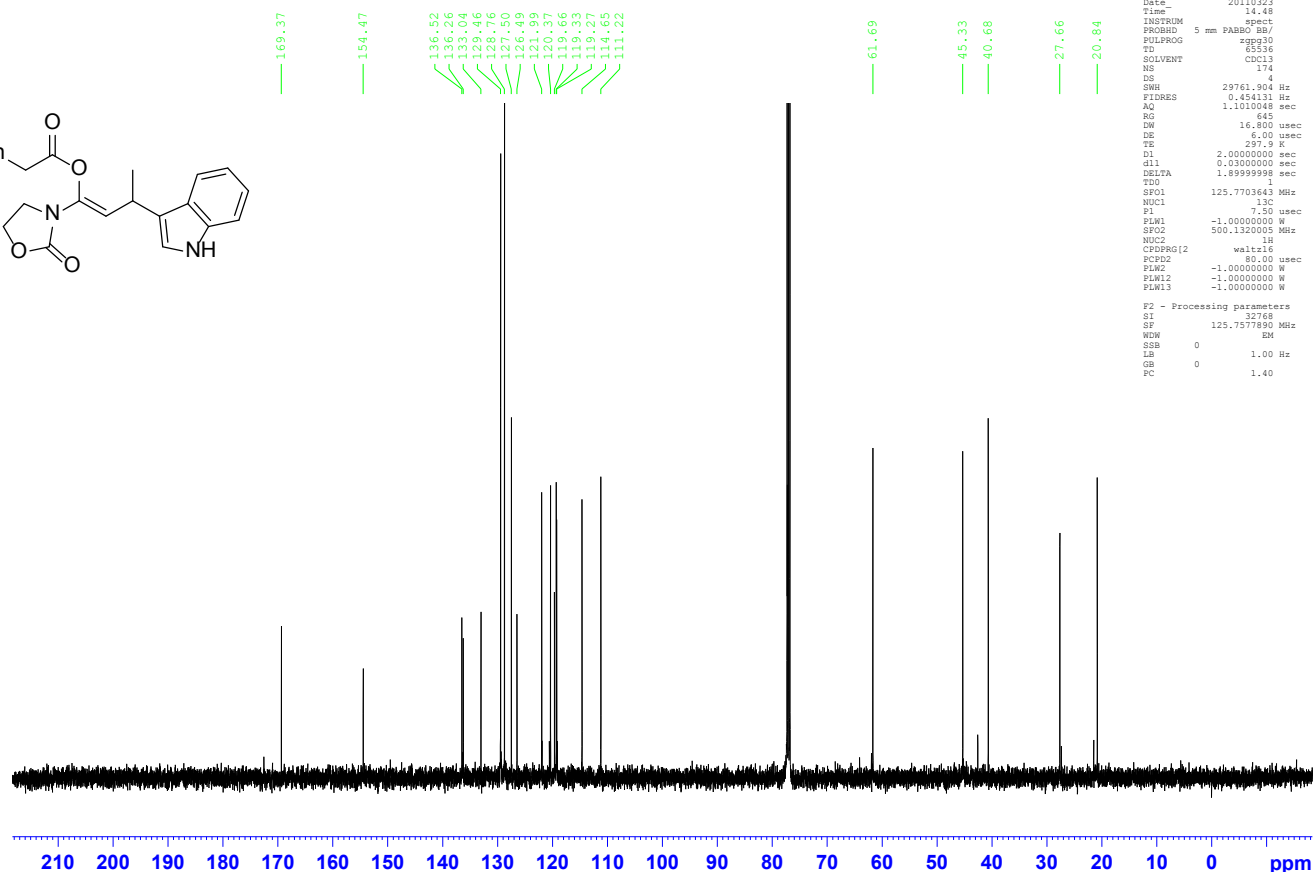

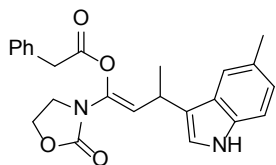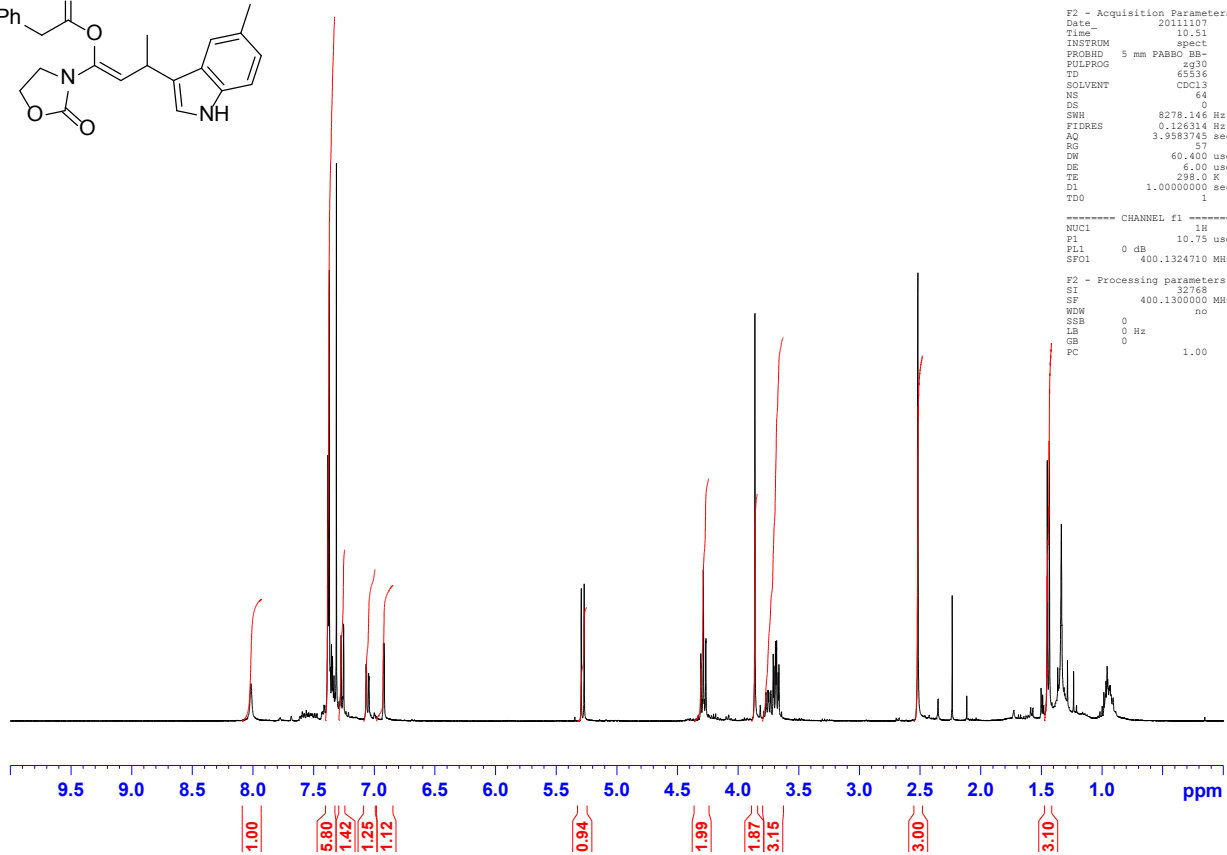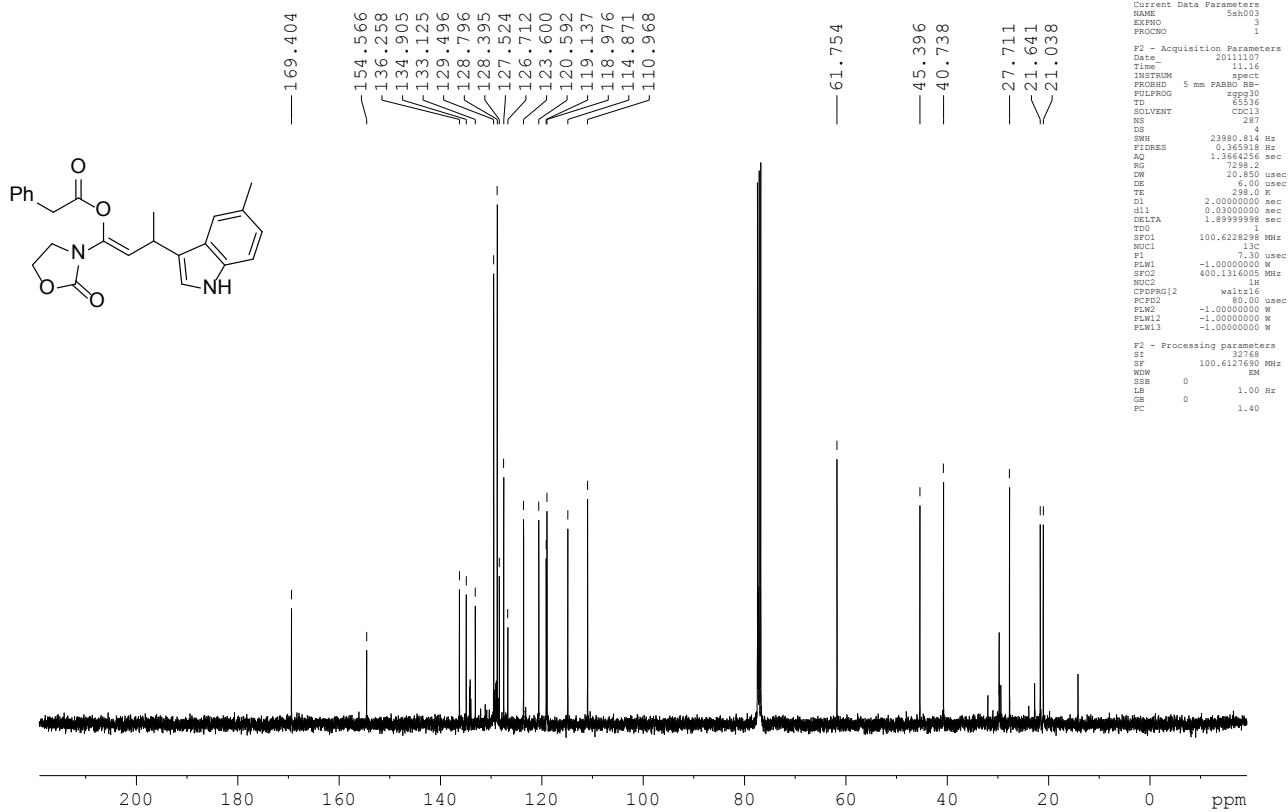

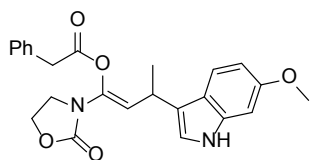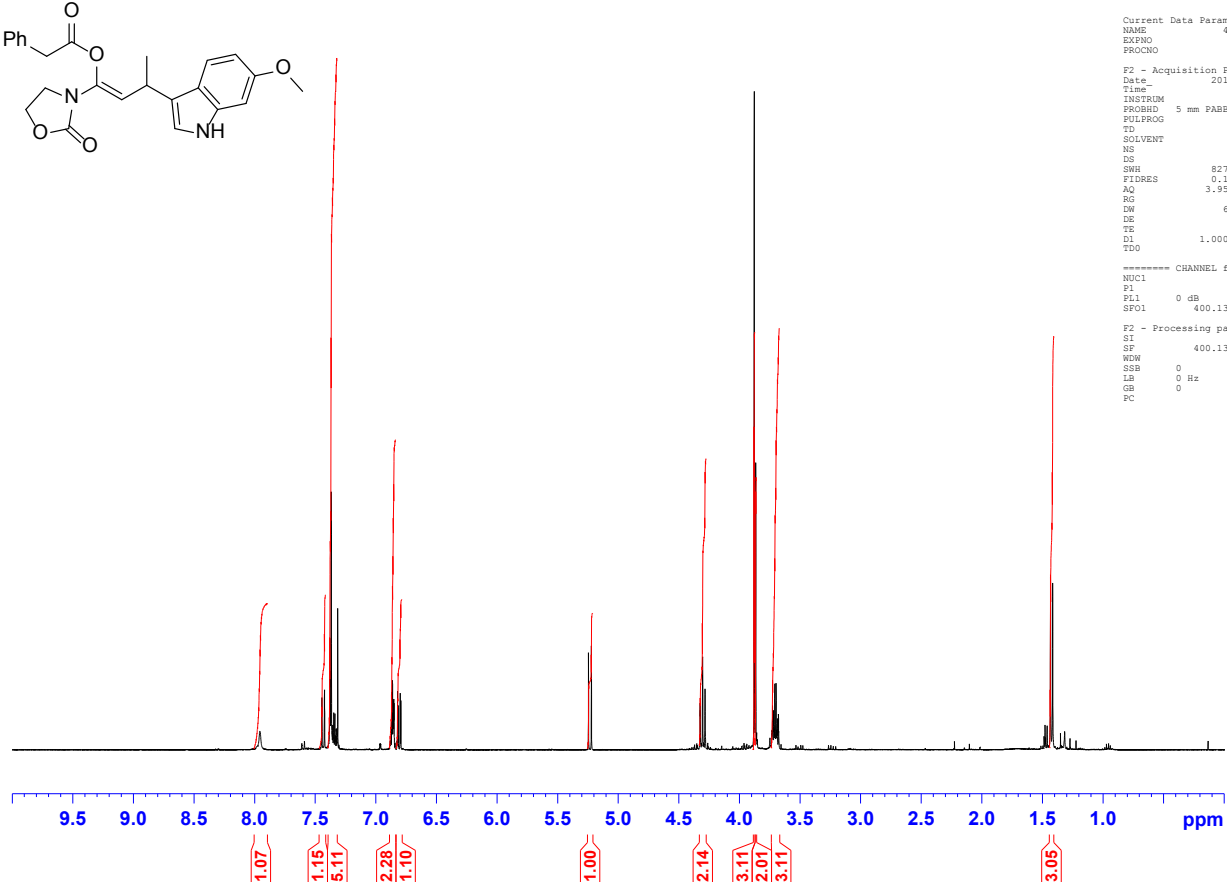

169.393  
 156.495  
 154.471  
 137.313  
 136.258  
 133.079  
 129.493  
 128.789  
 127.533  
 120.998  
 119.973  
 119.696  
 119.100  
 114.728  
 109.295  
 94.710  
 61.718  
 55.715  
 45.386  
 40.725  
 27.706  
 20.783

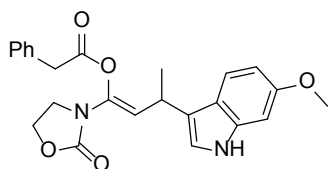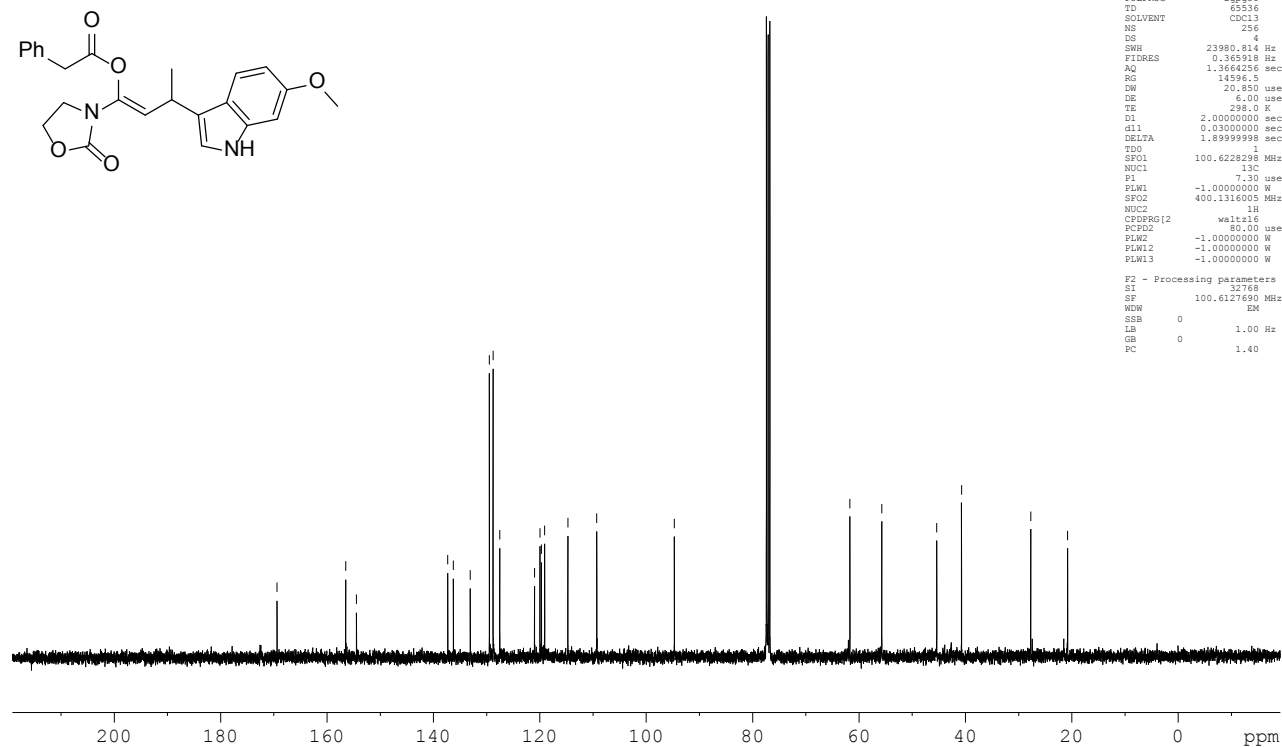



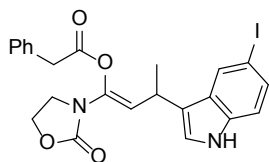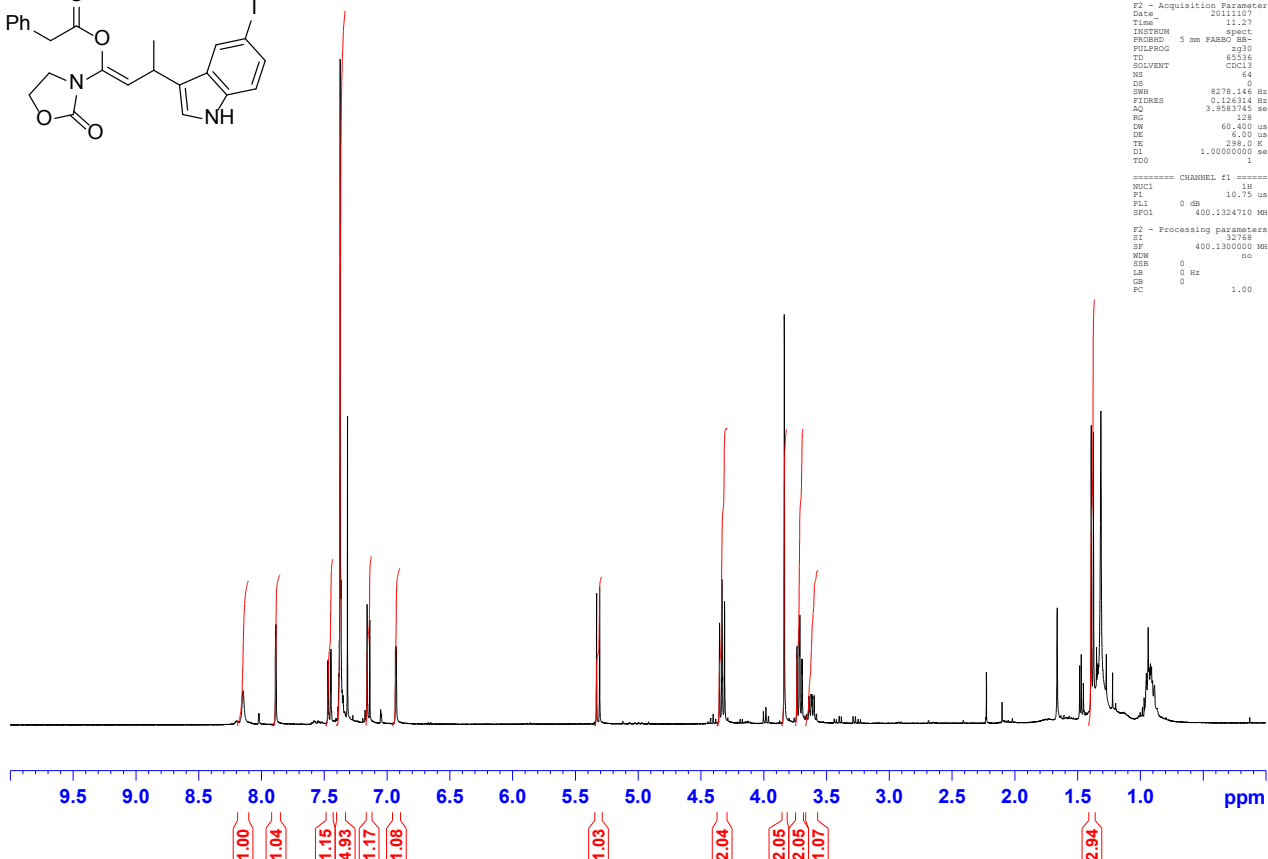

```

Current Data Parameters
NAME      5sb004
EXPNO    1
PROCNO   1

F2 - Acquisition Parameters
Date_    2011107
Time     11:27
INSTRUM  spect
PROBHD   5 mm PABBO BB-
PULPROG  zg30
TD        65536
SOLVENT  CDCl3
NS        64
DS        4
SWH       8278.146 Hz
FIDRES   0.126314 Hz
AQ        3.9583743 sec
RG        128
DM        60.400 usec
DE        8.00 usec
TE        298.0 K
D1        1.00000000 sec
TDO       1

===== CHANNEL f1 =====
NUC1      1H
P1        10.75 usec
PL1       0 dB
SFO1      400.1324710 MHz

F2 - Processing parameters
SI        32768
SF        400.1300000 MHz
WDW       no
SSB       0
LB        0 Hz
GB        0
PC        1.00
    
```

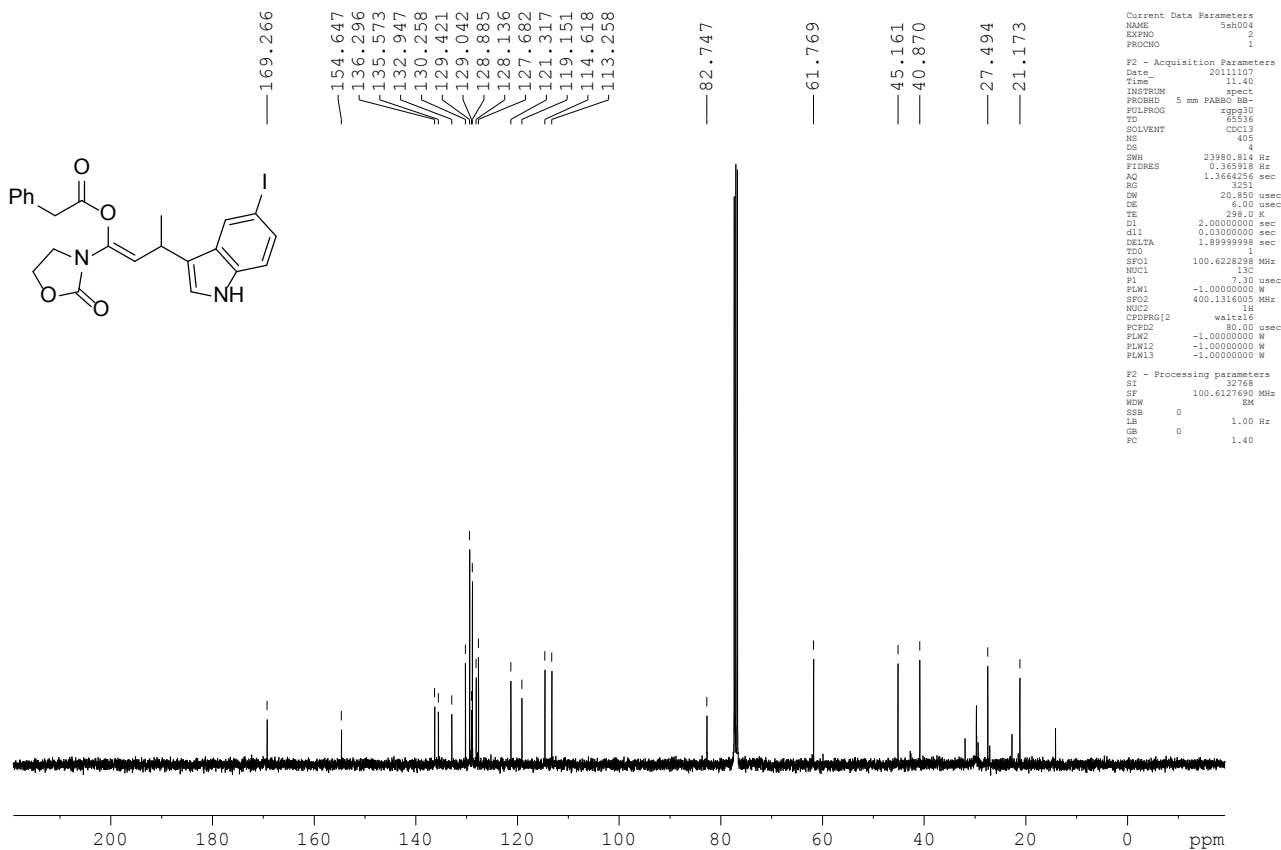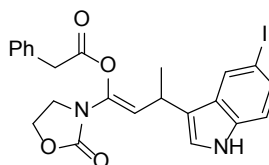

```

Current Data Parameters
NAME      5sb004
EXPNO    2
PROCNO   1

F2 - Acquisition Parameters
Date_    2011107
Time     11:40
INSTRUM  spect
PROBHD   5 mm PABBO BB-
PULPROG  zgpg30
TD        65536
SOLVENT  CDCl3
NS        405
DS        4
SWH       23980.814 Hz
FIDRES   0.365918 Hz
AQ        1.3664256 sec
RG        3251
DM        20.850 usec
DE        8.00 usec
TE        298.0 K
D1        2.00000000 sec
d11       0.03000000 sec
DELTA     1.89999998 sec
TDO       1
SFO1      100.6228298 MHz
NUC1      13C
P1        7.30 usec
PL1       -1.00000000 W
SFO2      400.1316000 MHz
NUC2      1H
CPDPRG2  waltz16
PCPD2     80.00 usec
PLM2     -1.00000000 W
PLM12    -1.00000000 W
PLM13    -1.00000000 W

F2 - Processing parameters
SI        32768
SF        100.6127698 MHz
WDW       EM
SSB       0
LB        1.00 Hz
GB        0
PC        1.40
    
```

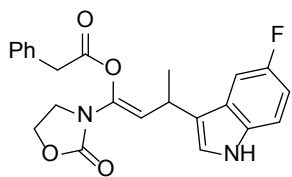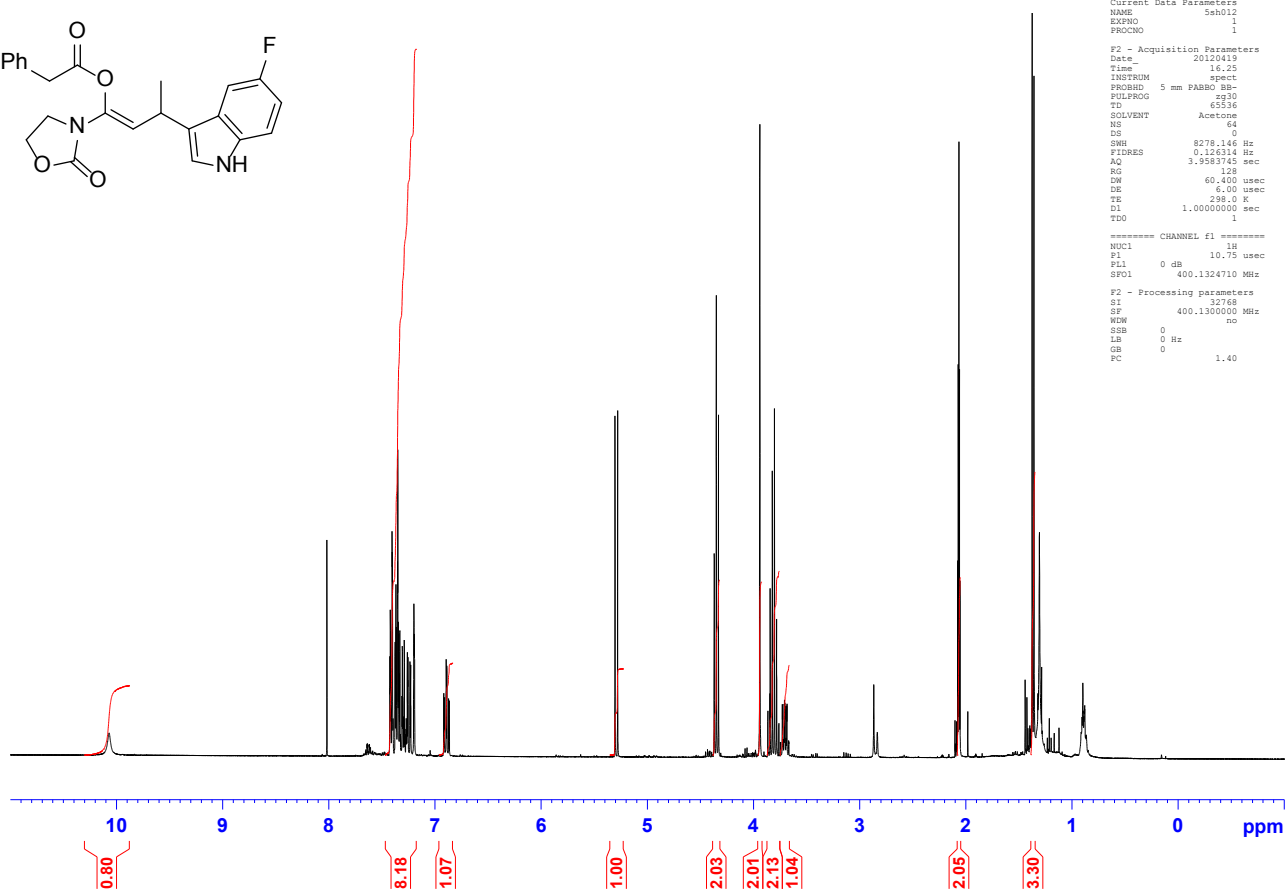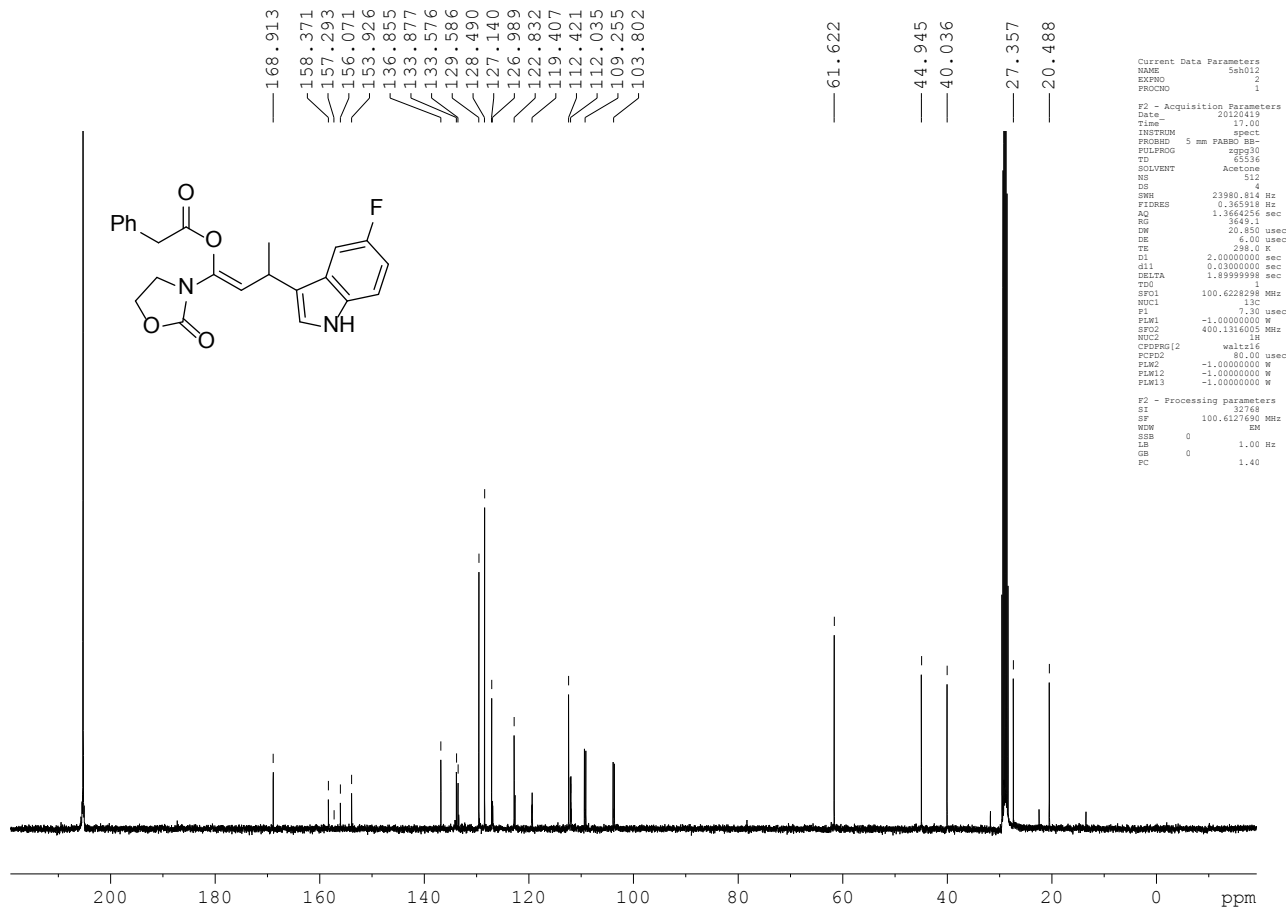

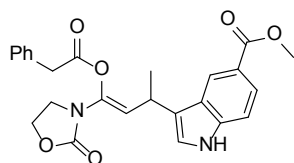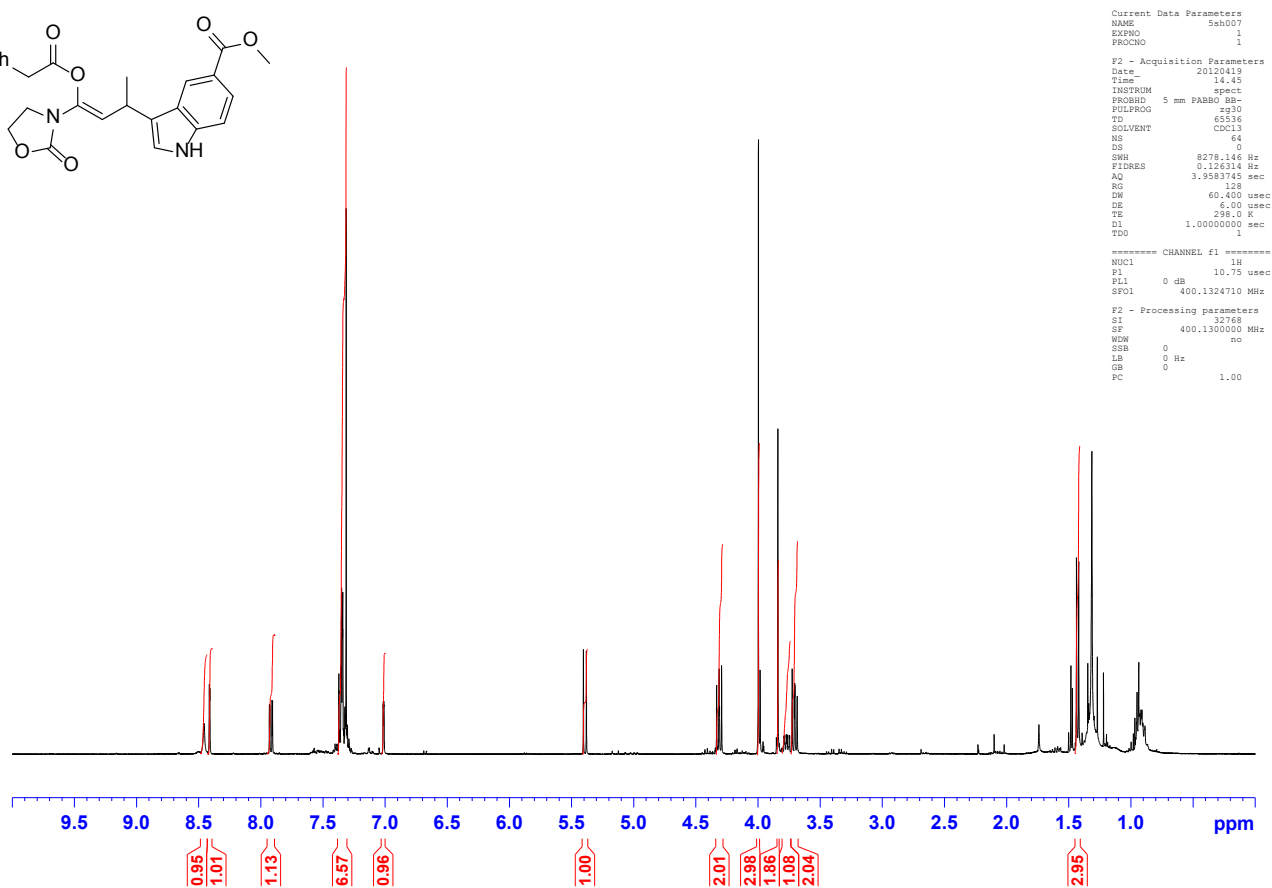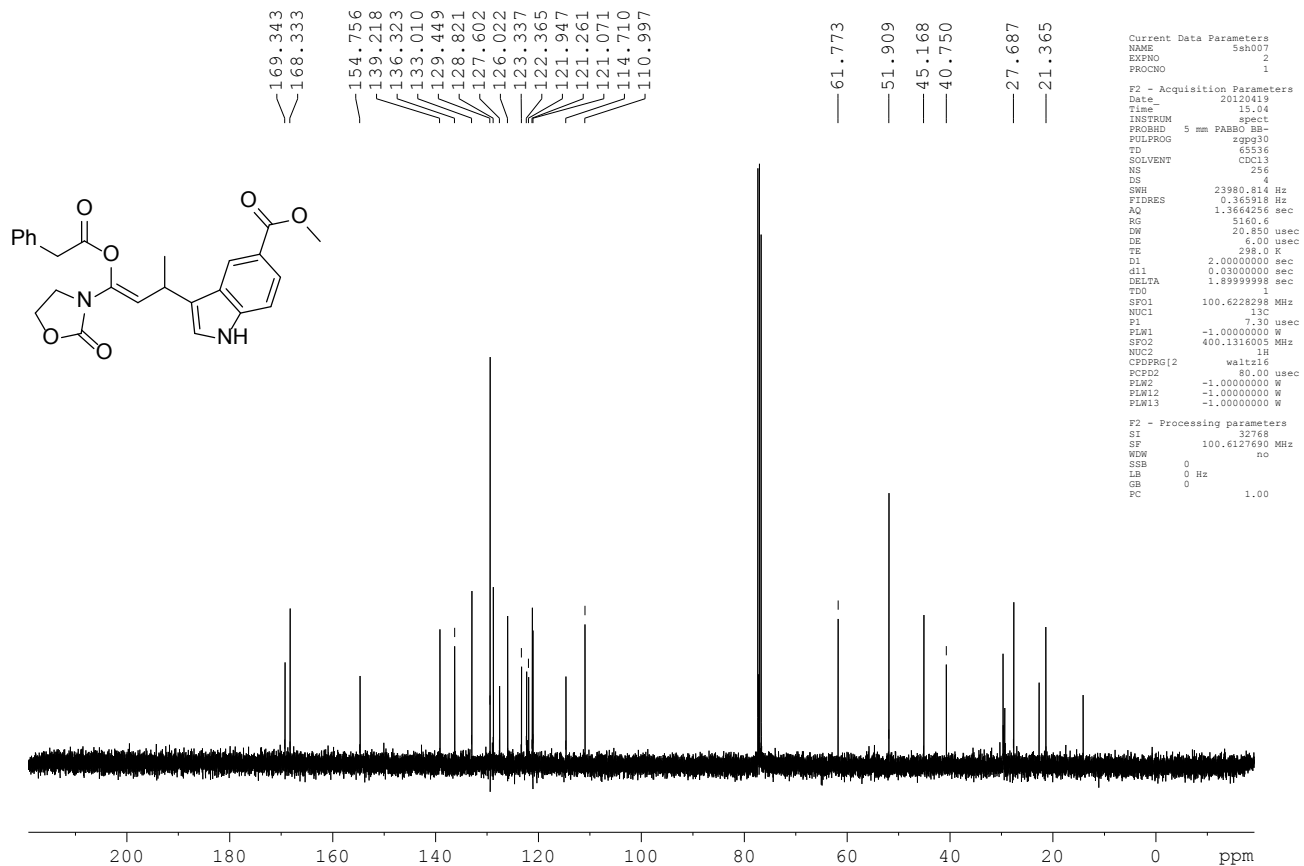

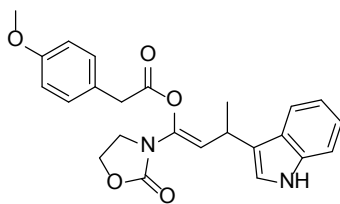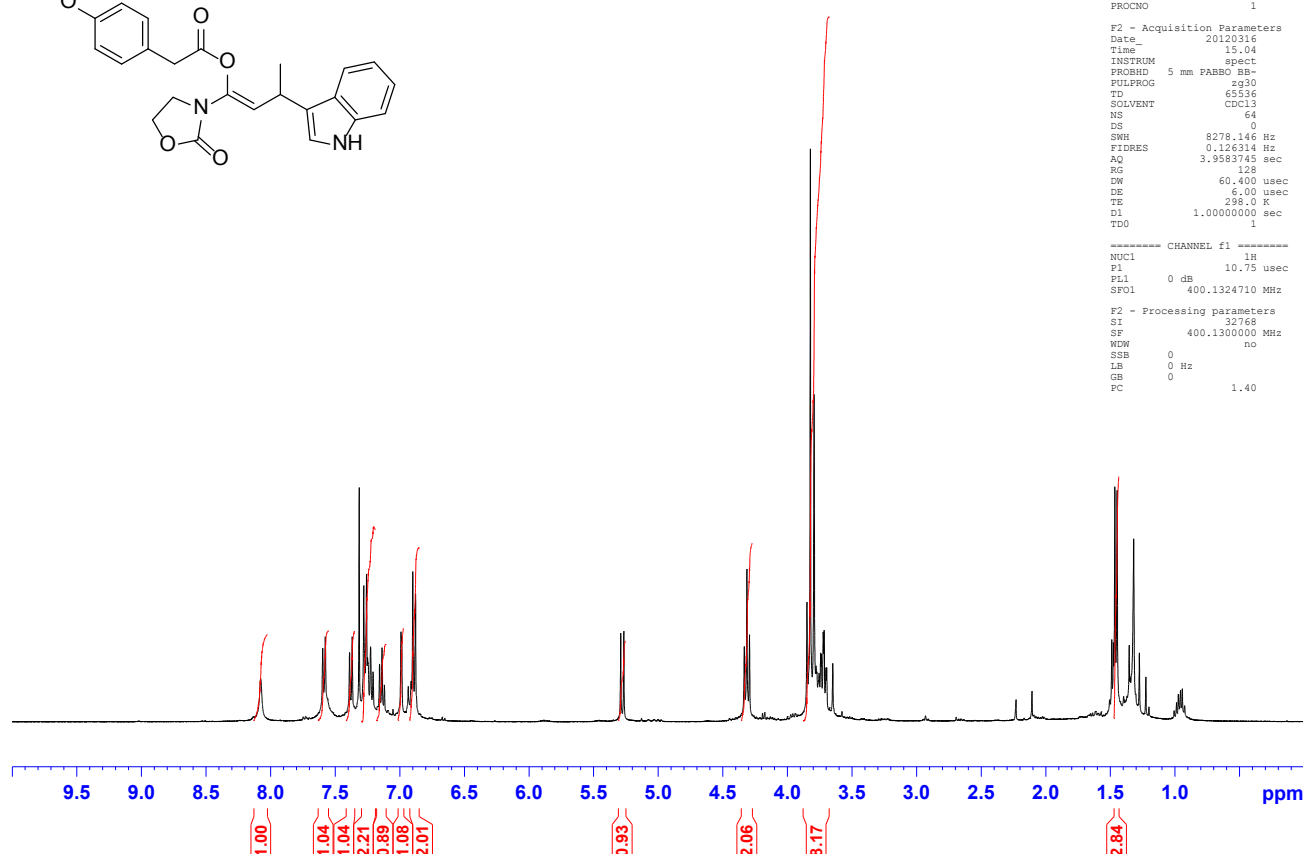

```

Current Data Parameters
NAME          Ssh077
EXPNO         1
PROCNO        1

F2 - Acquisition Parameters
Date_         20120316
Time          15.04
INSTRUM       spect
PROBHD        5 mm PABBO BB-
PULPROG       zgpg30
TD            65536
SOLVENT       CDCl3
NS            64
DS            0
SWH           8278.146 Hz
FIDRES        0.126314 Hz
AQ            3.9589745 sec
RG            128
DW            60.400 usec
DE            6.00 usec
TE            298.0 K
D1            1.00000000 sec
TDD           1

----- CHANNEL f1 -----
NUC1          1H
P1            10.75 usec
PL1           0 dB
SFO1          400.1324710 MHz

F2 - Processing parameters
SI            32768
SF            400.1300000 MHz
WDW           no
SSB           0
LB            0 Hz
GB            0
PC            1.40
    
```

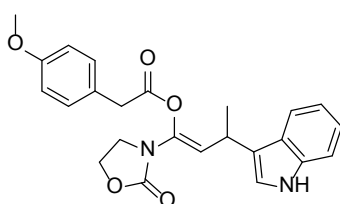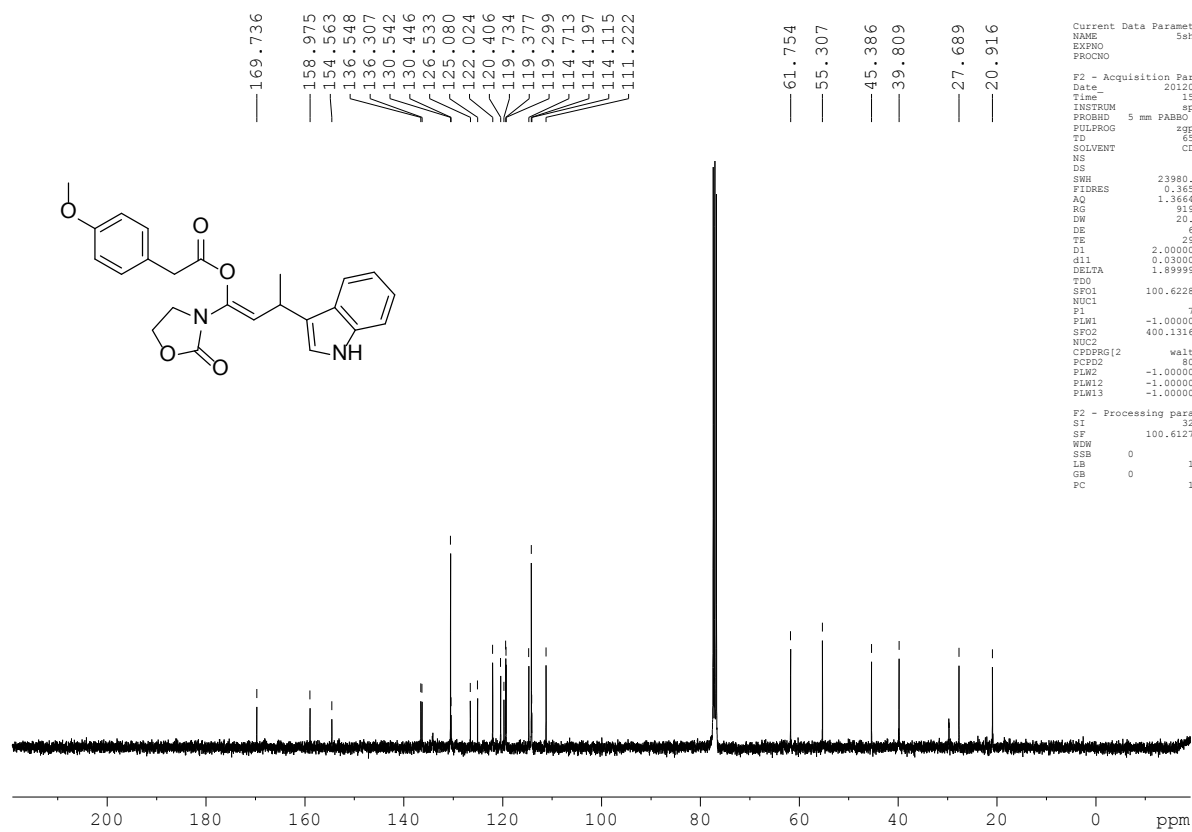

```

Current Data Parameters
NAME          Ssh077
EXPNO         2
PROCNO        1

F2 - Acquisition Parameters
Date_         20120316
Time          15.24
INSTRUM       spect
PROBHD        5 mm PABBO BB-
PULPROG       zgpg30
TD            65536
SOLVENT       CDCl3
NS            512
DS            4
SWH           23980.814 Hz
FIDRES        0.365918 Hz
AQ            1.3654256 sec
RG            9195.2
DW            20.850 usec
DE            6.00 usec
TE            298.0 K
D1            2.00000000 sec
d11           0.03000000 sec
DELTA         1.89999998 sec
TDG           1
SFO1          100.6228298 MHz
NUC1          13C
P1            7.30 usec
PLW1          -1.00000000 W
SFO2          400.1316005 MHz
NUC2          16
CPDPRG2       waltz16
PCPD2         80.00 usec
PLW2          -1.00000000 W
PLW12         -1.00000000 W
PLW13         -1.00000000 W

F2 - Processing parameters
SI            32768
SF            100.6127690 MHz
WDW           EM
SSB           0
LB            1.00 Hz
GB            0
PC            1.40
    
```

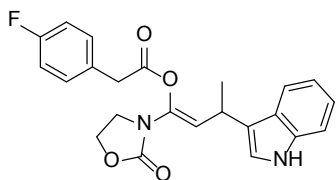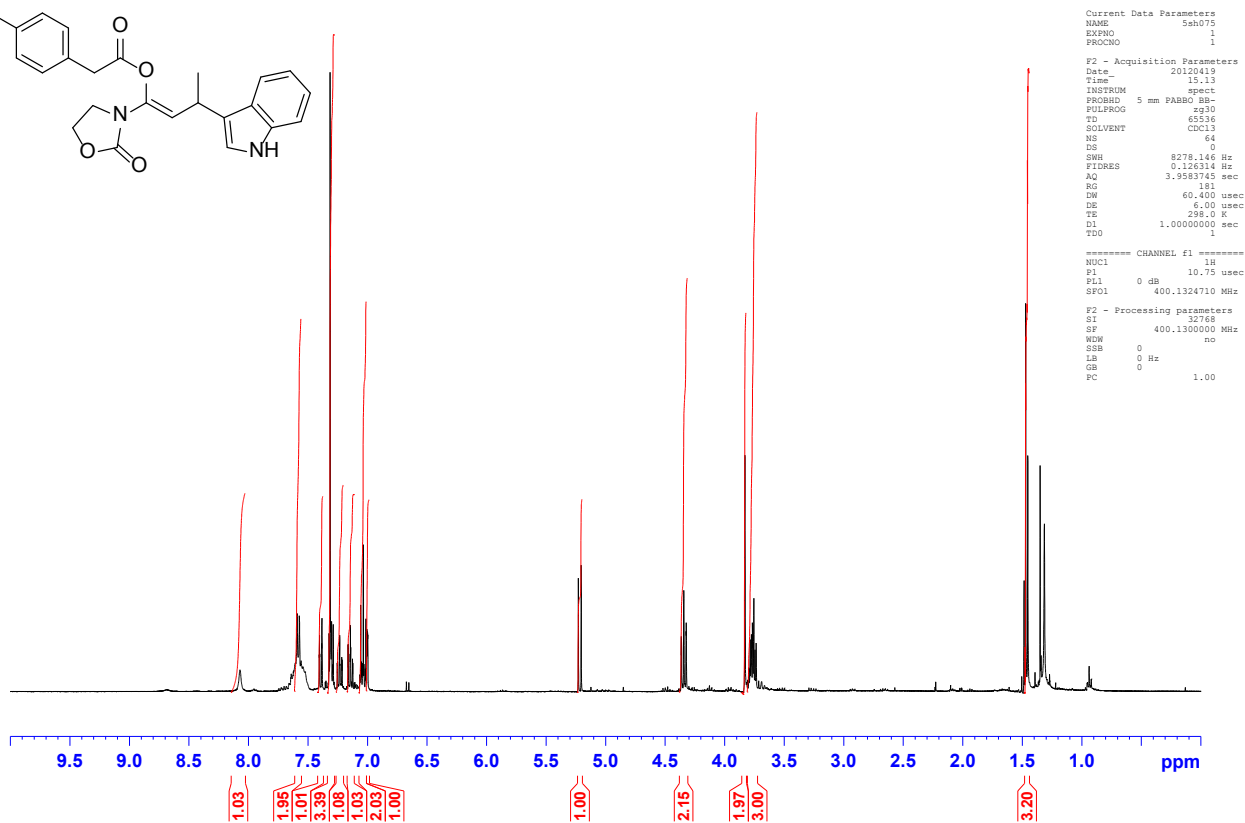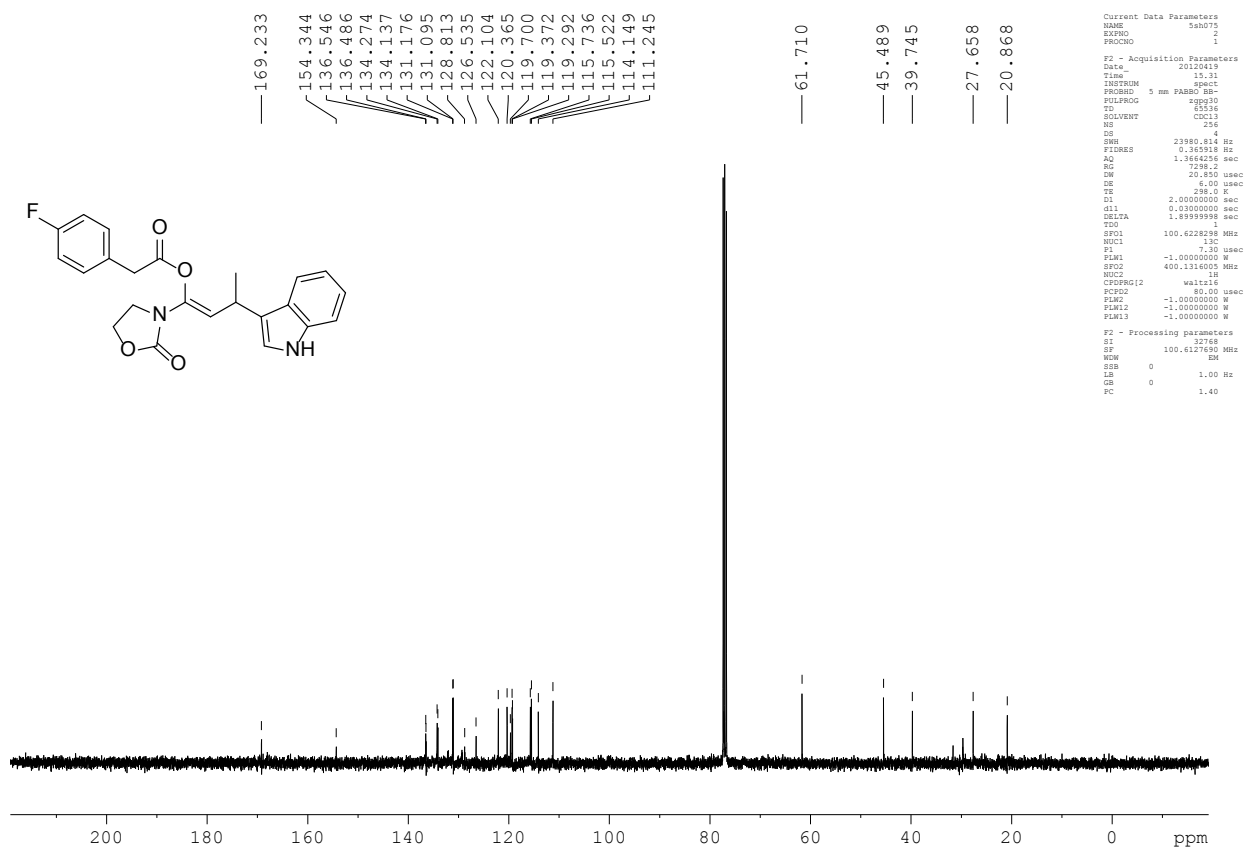

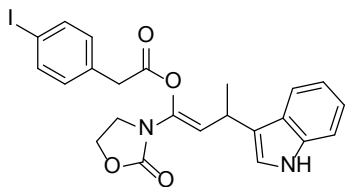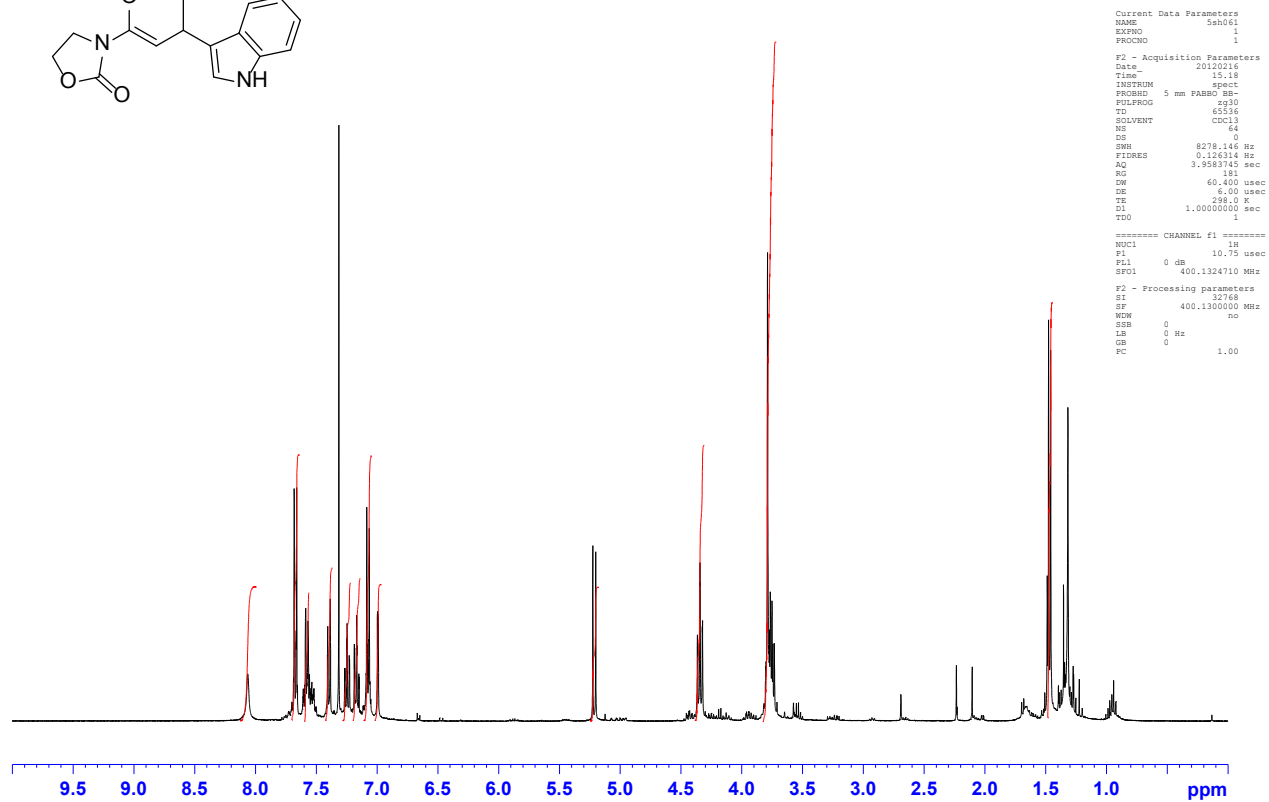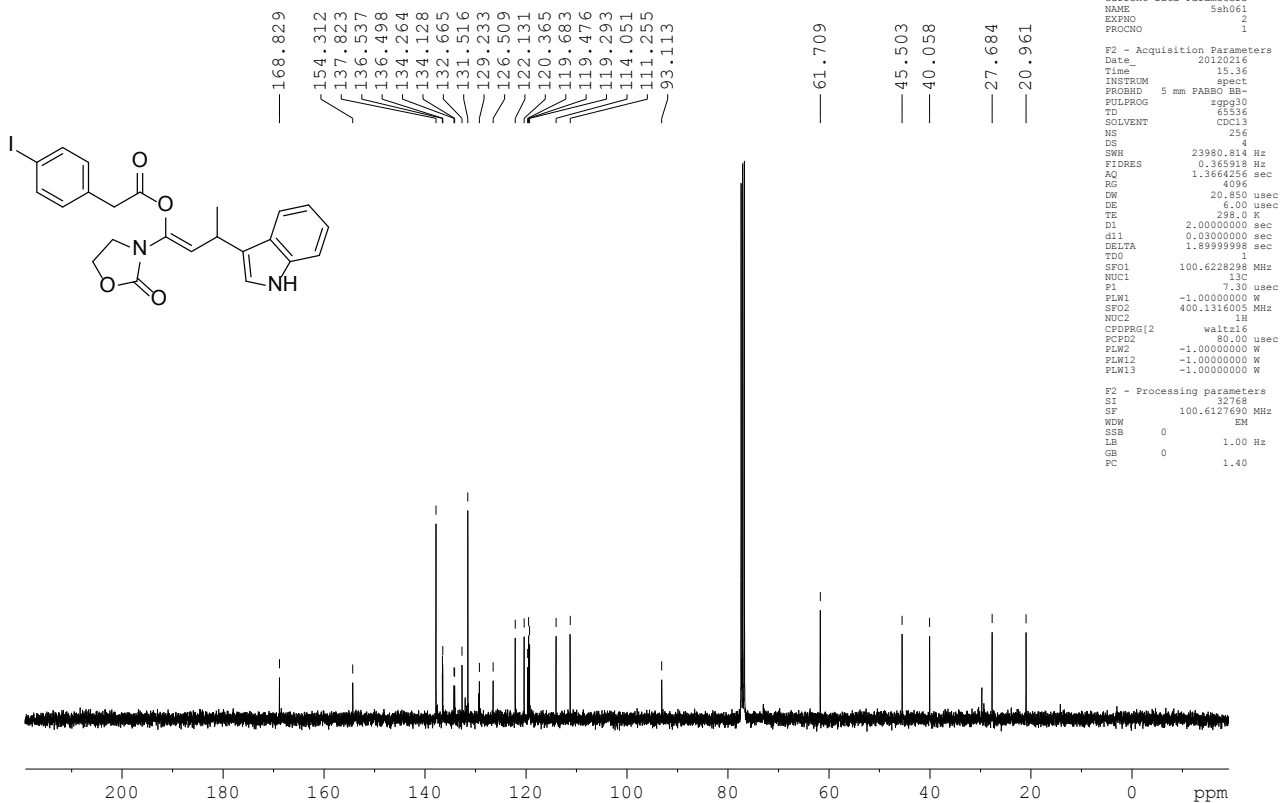

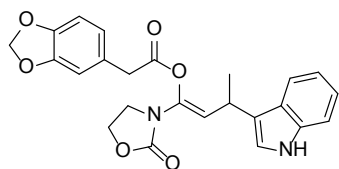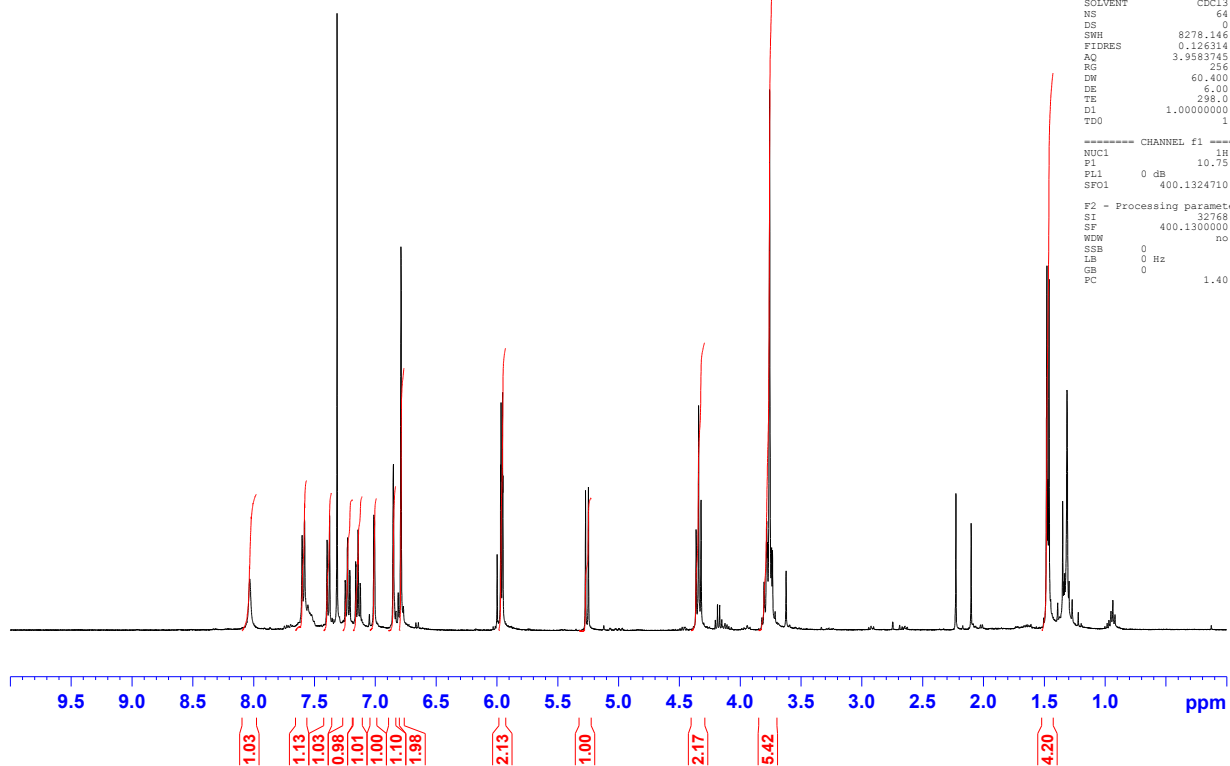

```

Current Data Parameters
NAME      5sh078
EXPNO    1
PROCNO   1

F2 - Acquisition Parameters
Date_    20120316
Time     15:57
INSTRUM  spect
PROBHD   5 mm PABBO BB-
PULPROG  zg30
TD       65536
SOLVENT  CDCl3
NS       64
DS       0
SWH      8278.146 Hz
FIDRES   0.126314 Hz
AQ       3.9583745 sec
RG       256
DE       60.400 usec
DM       6.00 usec
TE       298.0 K
D1       1.00000000 sec
TDO      1

----- CHANNEL f1 -----
NUC1     1H
P1       10.75 usec
PL1     0 dB
SFO1    400.1324710 MHz

F2 - Processing parameters
SI       32768
SF       400.1300000 MHz
WDW      no
SSB      0
LB       0 Hz
GB       0
PC       1.40
    
```

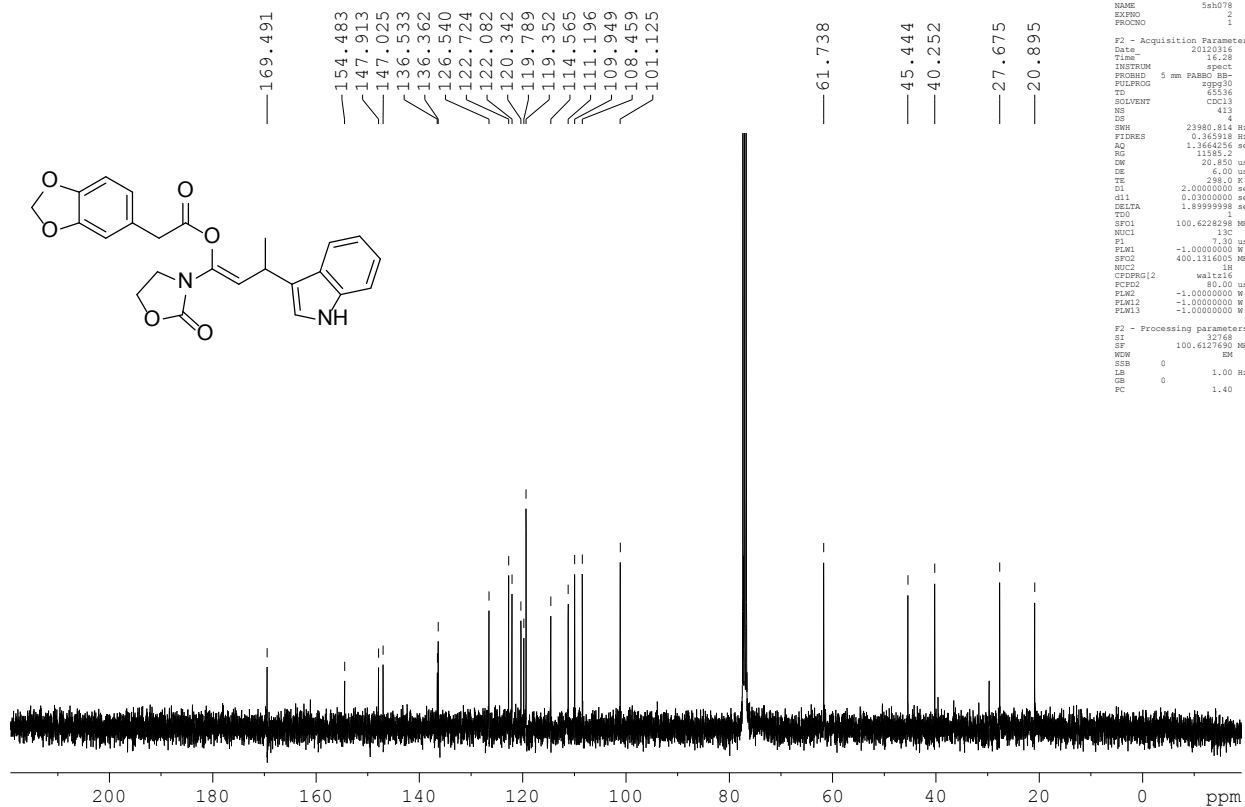

```

Current Data Parameters
NAME      5sh078
EXPNO    1
PROCNO   1

F2 - Acquisition Parameters
Date_    20120316
Time     15:28
INSTRUM  spect
PROBHD   5 mm PABBO BB-
PULPROG  zgpg30
TD       65536
SOLVENT  CDCl3
NS       413
DS       1
SWH      23880.814 Hz
FIDRES   0.165918 Hz
AQ       1.3664256 sec
RG       13385.2
DE       20.850 usec
DM       6.00 usec
TE       298.0 K
D1       2.00000000 sec
d11      0.03000000 sec
DELTA    1.89999998 sec
TDO      1

SFO1    100.628298 MHz
NUC1    13C
P1       4.30 usec
PL1     -1.00000000 W
SFO2    400.1316005 MHz
NUC2    1H
CPDPRG2  waltz16
PCPD2    80.00 usec
PLW2    -1.00000000 W
PLW12   -1.00000000 W
PLW13   -1.00000000 W

F2 - Processing parameters
SI       32768
SF       100.6127658 MHz
WDW      EM
SSB      0
LB       1.00 Hz
GB       0
PC       1.40
    
```

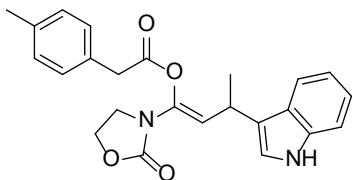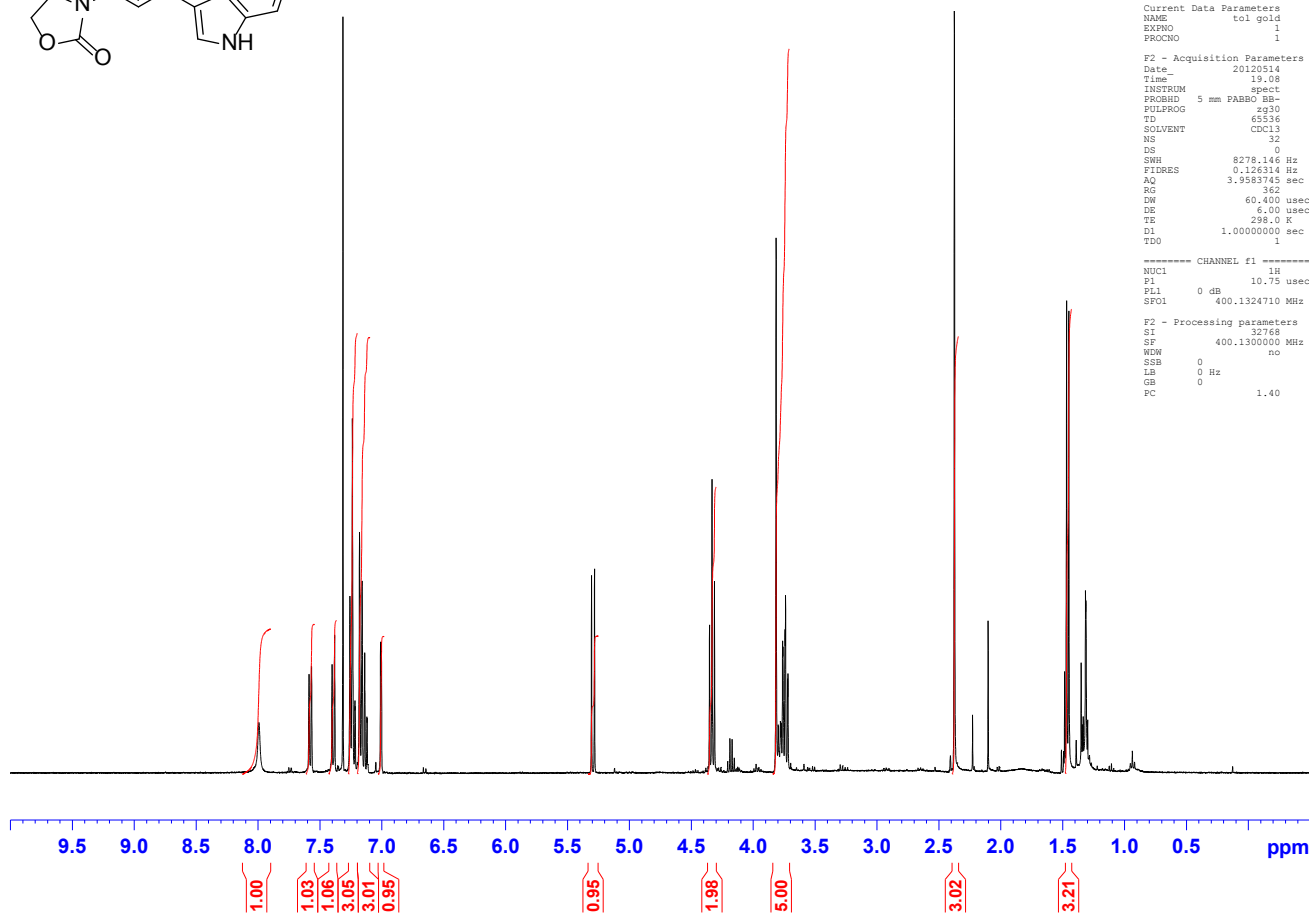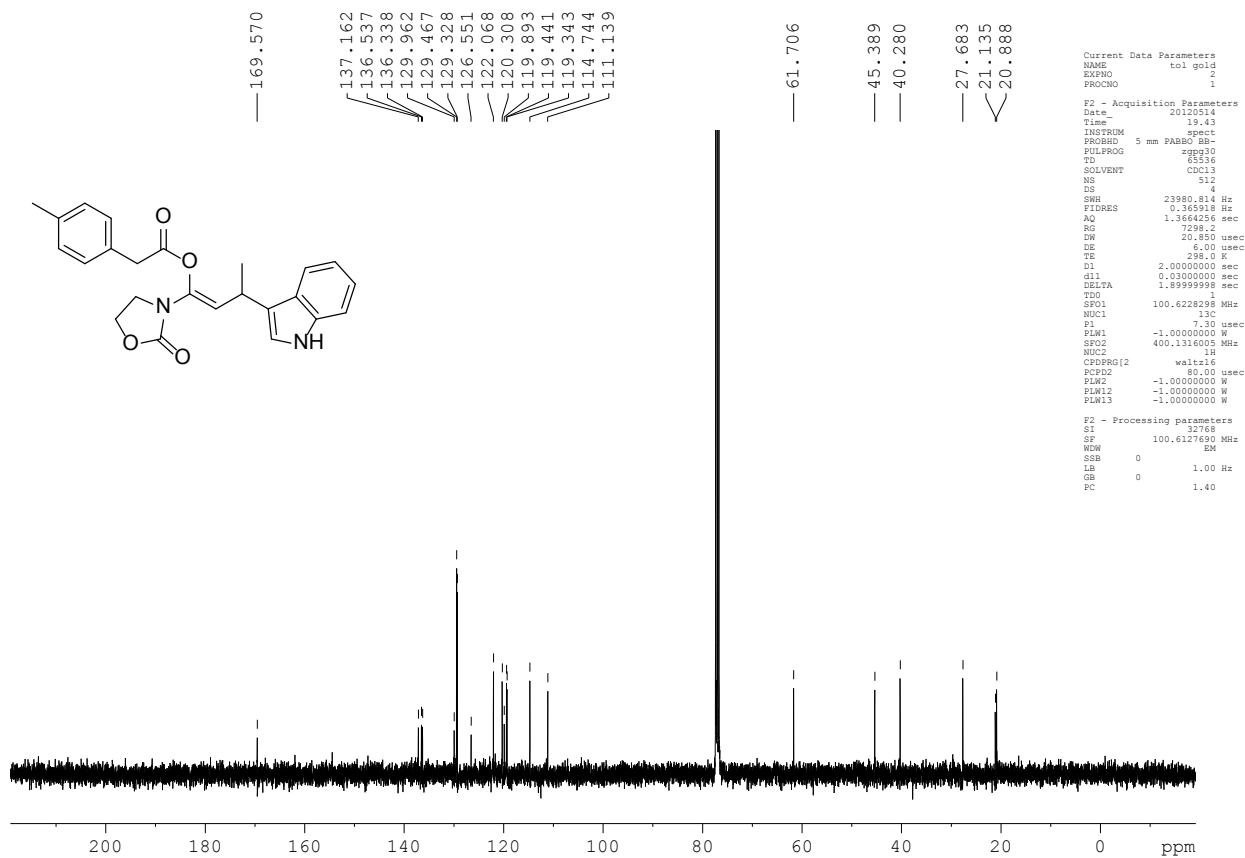



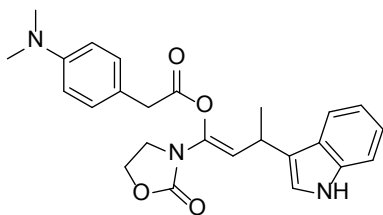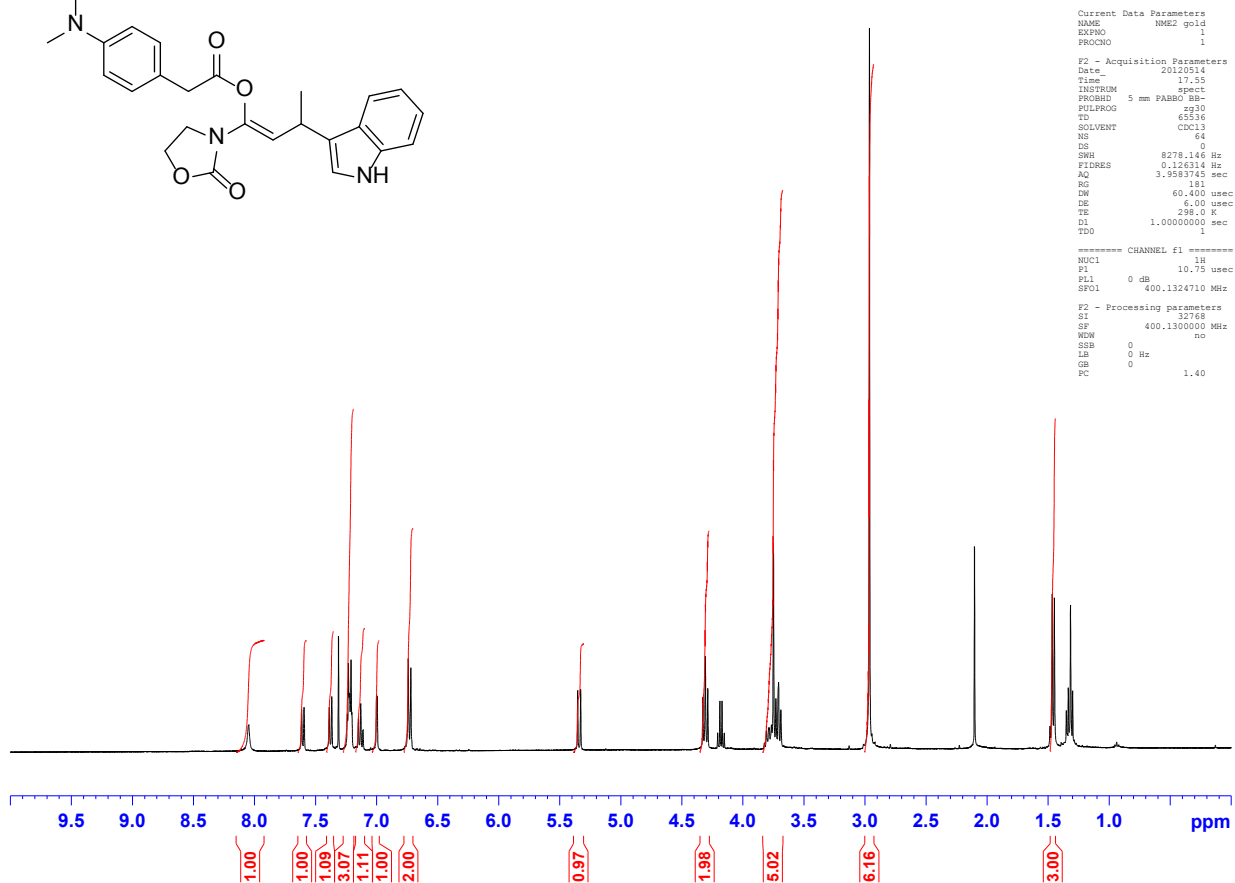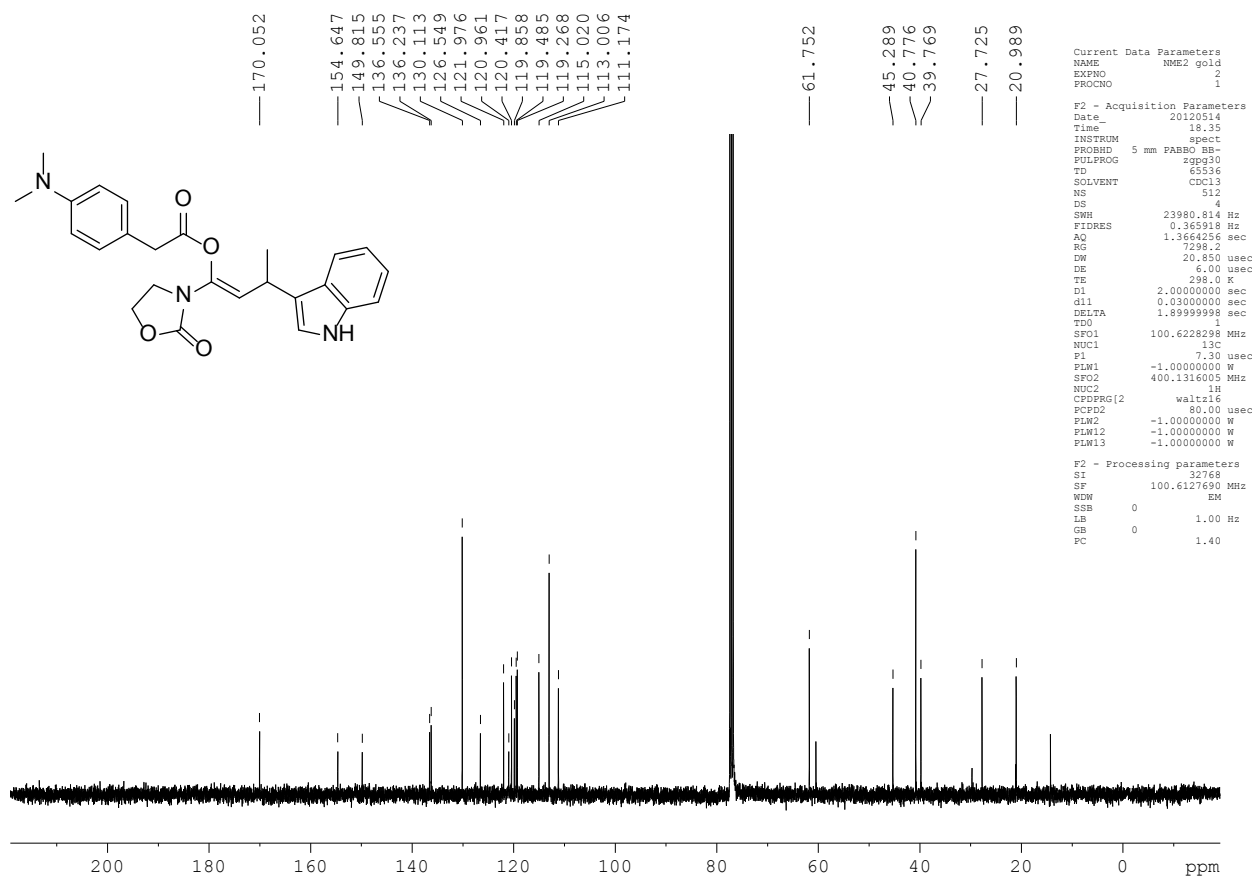

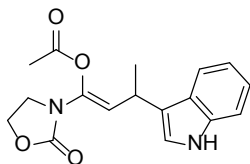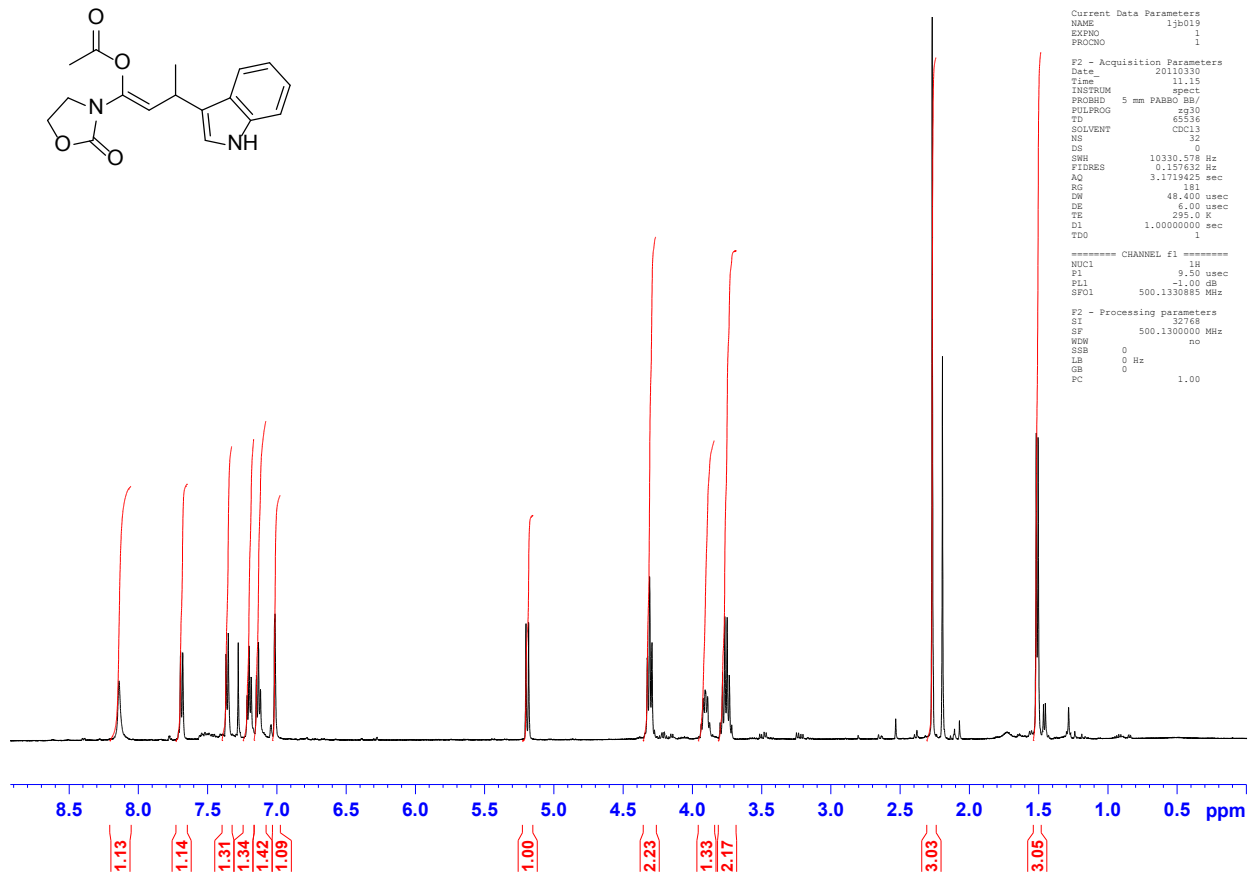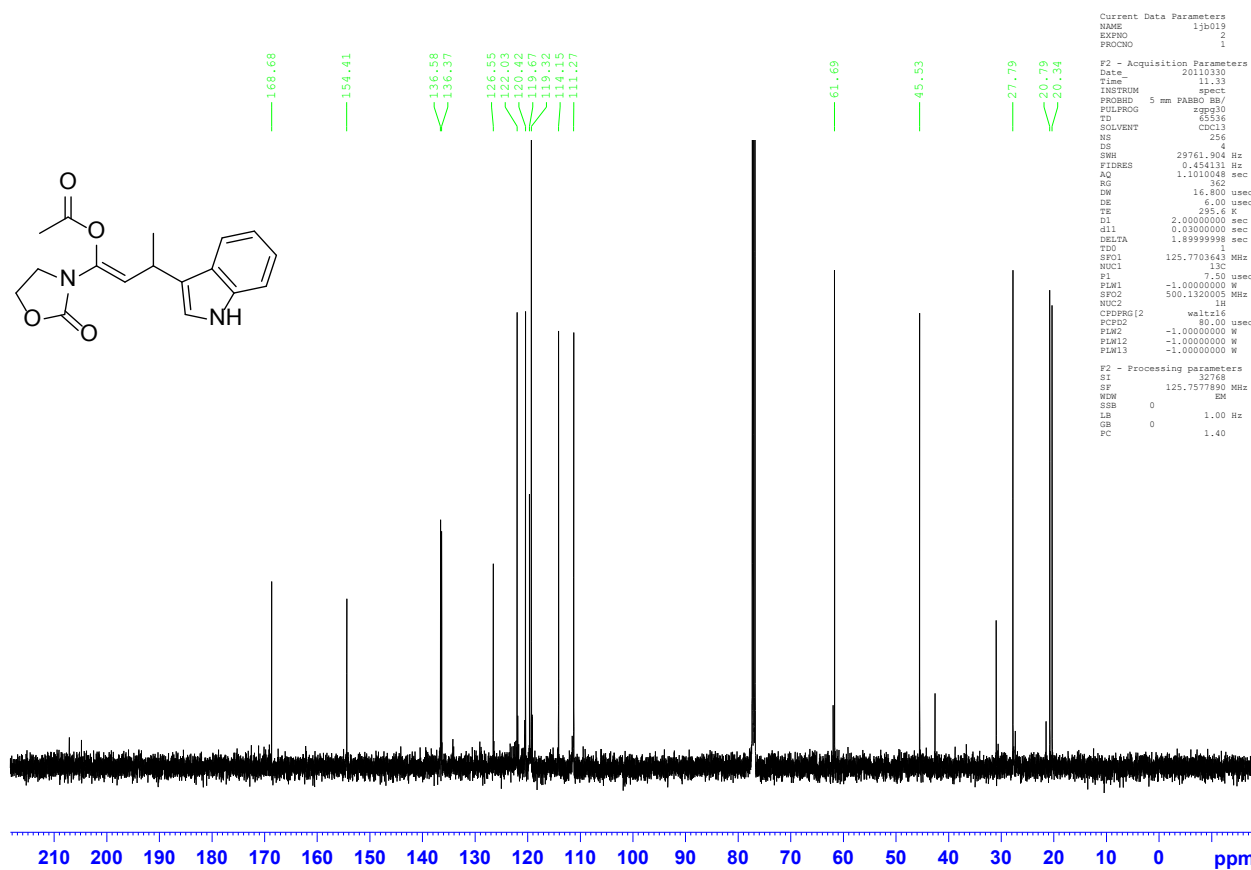

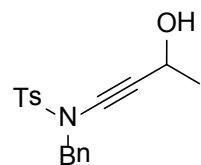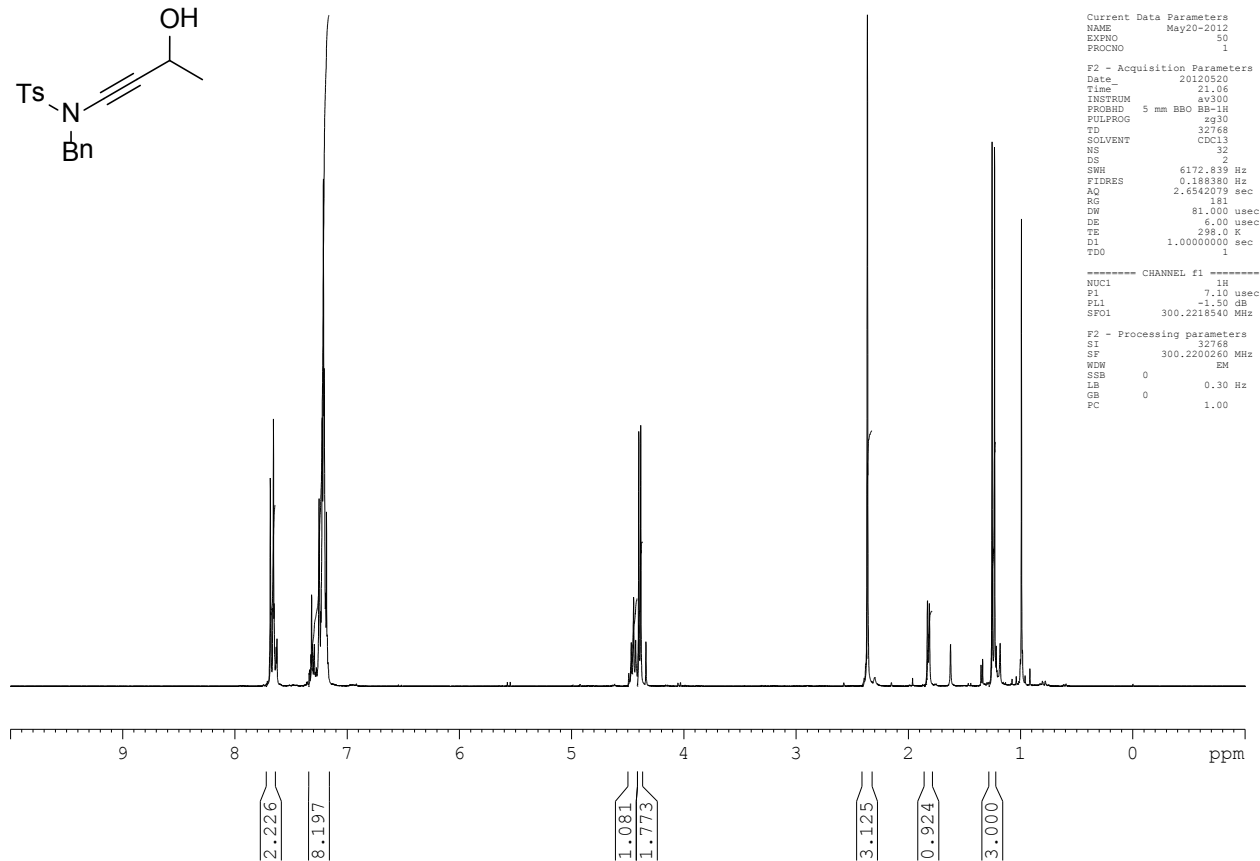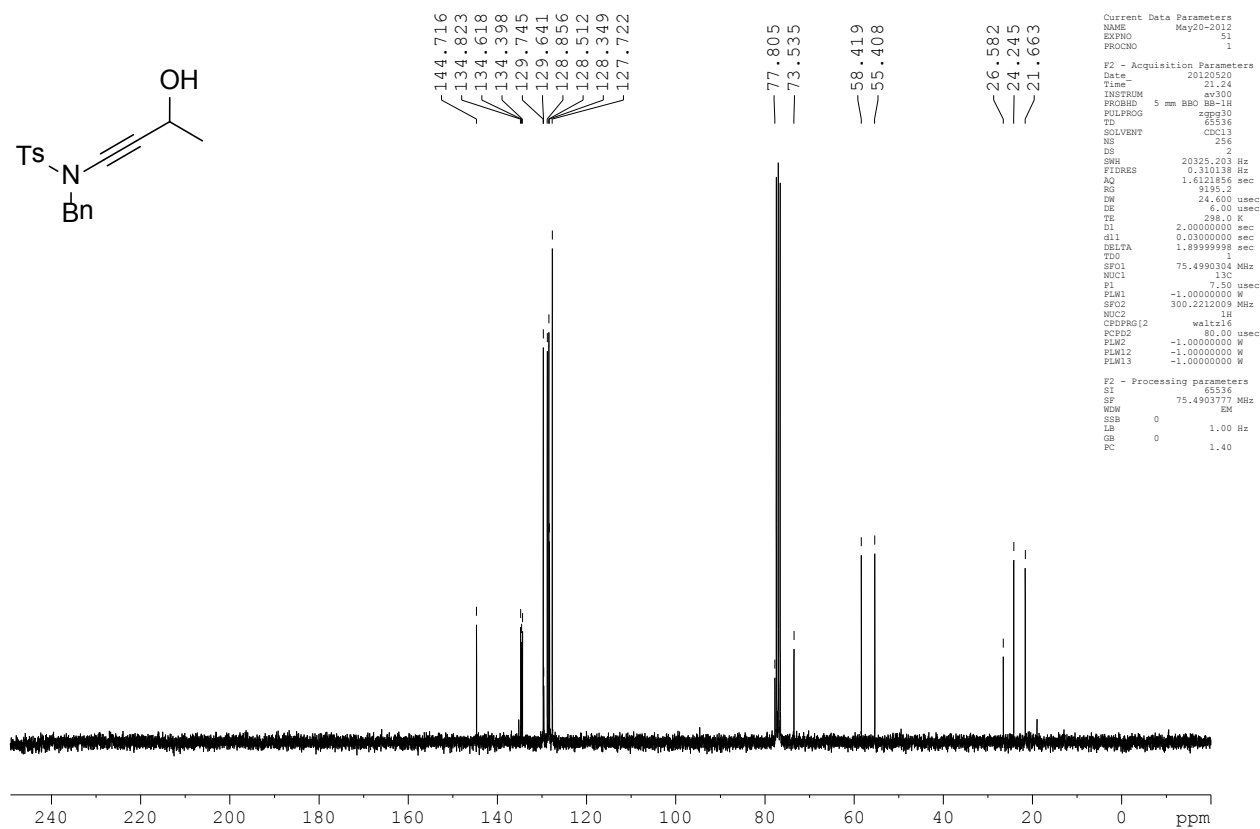

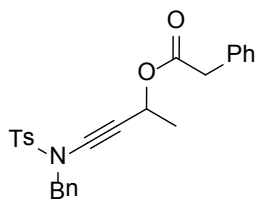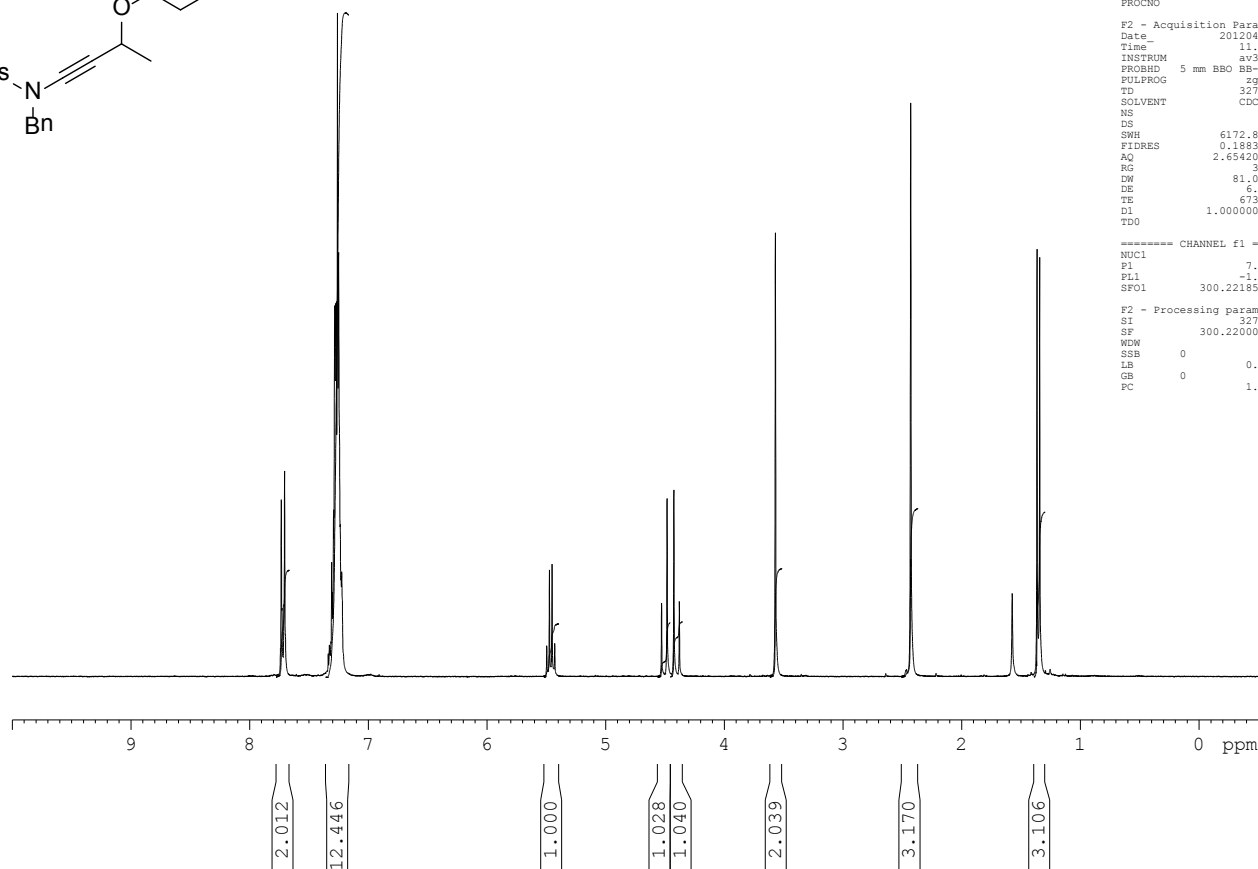

Current Data Parameters  
 NAME Apr02-2012  
 EXPNO 80  
 PROCNO 1  
 F2 - Acquisition Parameters  
 Date\_ 20120402  
 Time 11.12  
 INSTRUM av300  
 PROBHD 5 mm BBO BB-1H  
 PULPROG zg30  
 TD 32768  
 SOLVENT CDCl3  
 NS 32  
 DS 2  
 SWH 6172.839 Hz  
 FIDRES 0.166380 Hz  
 AQ 2.6542079 sec  
 RG 362  
 DW 81.000 usec  
 DE 6.00 usec  
 TE 673.2 K  
 DL 1.0000000 sec  
 TDO 1

===== CHANNEL f1 =====  
 NUC1 1H  
 P1 7.10 usec  
 PL1 -1.50 dB  
 SFO1 300.2218540 MHz  
 F2 - Processing parameters  
 SI 32768  
 SF 300.220023 MHz  
 WDW EM  
 SSB 0  
 LB 0.30 Hz  
 GB 0  
 PC 1.00

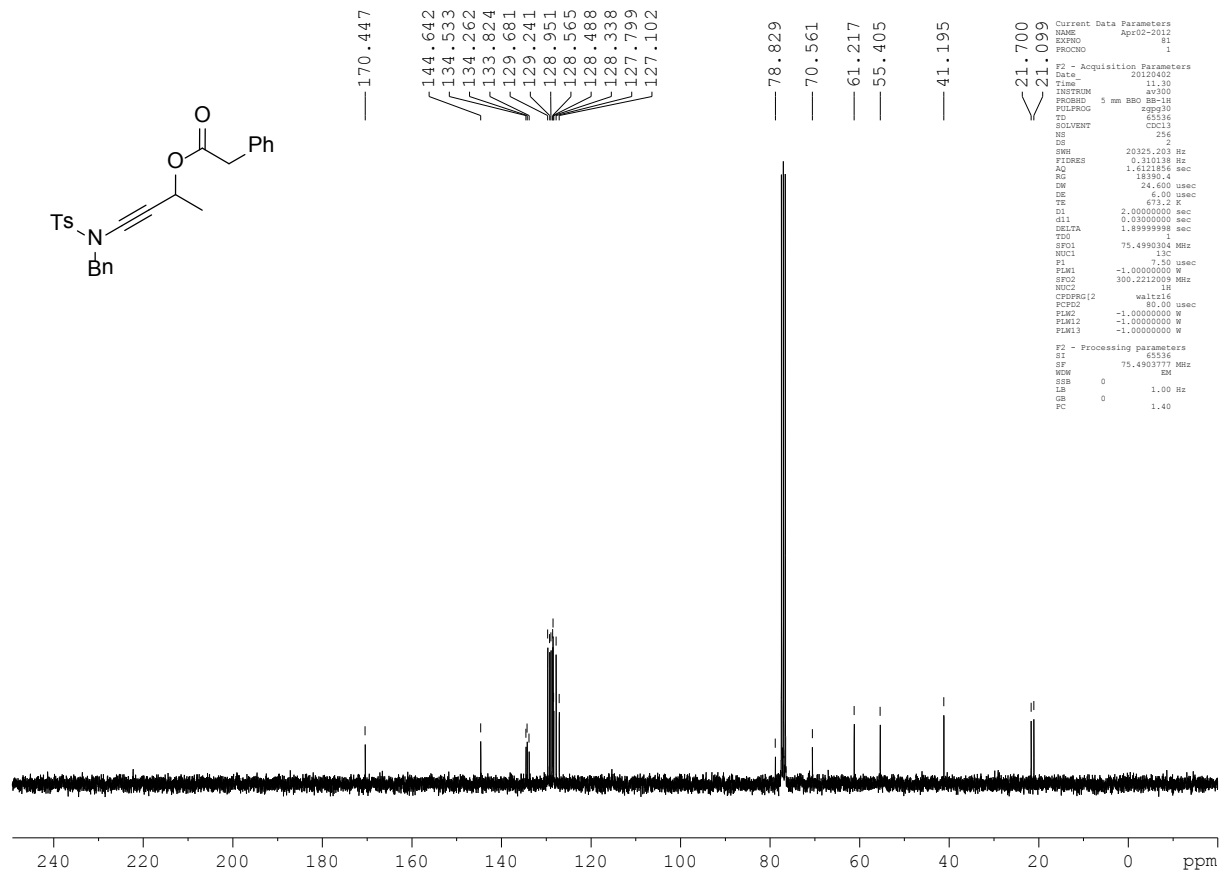

Current Data Parameters  
 NAME Apr02-2012  
 EXPNO 1  
 PROCNO 1  
 F2 - Acquisition Parameters  
 Date\_ 20120402  
 Time 11.30  
 INSTRUM av300  
 PROBHD 5 mm BBO BB-1H  
 PULPROG zgpg30  
 TD 65536  
 SOLVENT CDCl3  
 NS 256  
 DS 4  
 SWH 20325.203 Hz  
 FIDRES 0.310138 Hz  
 AQ 1.621894 sec  
 RG 18380.4  
 DW 24.600 usec  
 SE 6.00 usec  
 TE 673.2 K  
 SI 2.0000000 sec  
 SFO1 0.0300000 sec  
 DELTA 1.8999999 sec  
 TDO 1  
 SFO1 75.4990304 MHz  
 NUC1 13C  
 P1 7.50 usec  
 PL1 -1.0000000 W  
 SFO2 300.2218540 MHz  
 NUC2 1H  
 PCPFG12 waltz16  
 PCPD2 80.00 usec  
 PLM2 -1.0000000 W  
 PLM12 -1.0000000 W  
 PLM13 -1.0000000 W  
 F2 - Processing parameters  
 SI 65536  
 SF 75.4990377 MHz  
 WDW EM  
 SSB 0  
 LB 1.00 Hz  
 GB 0  
 PC 1.40

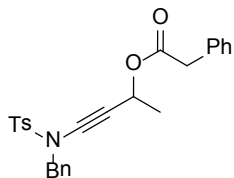

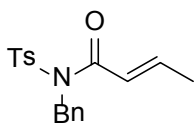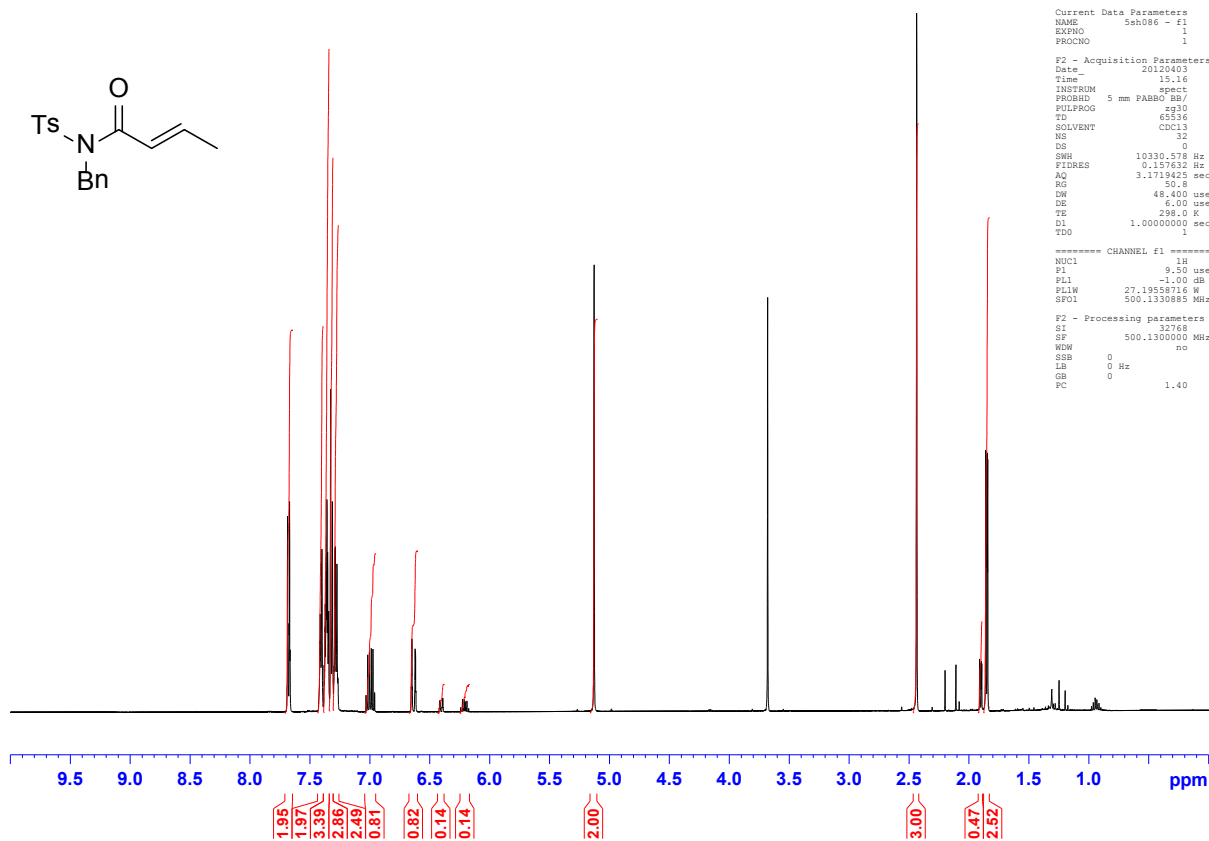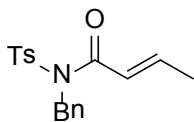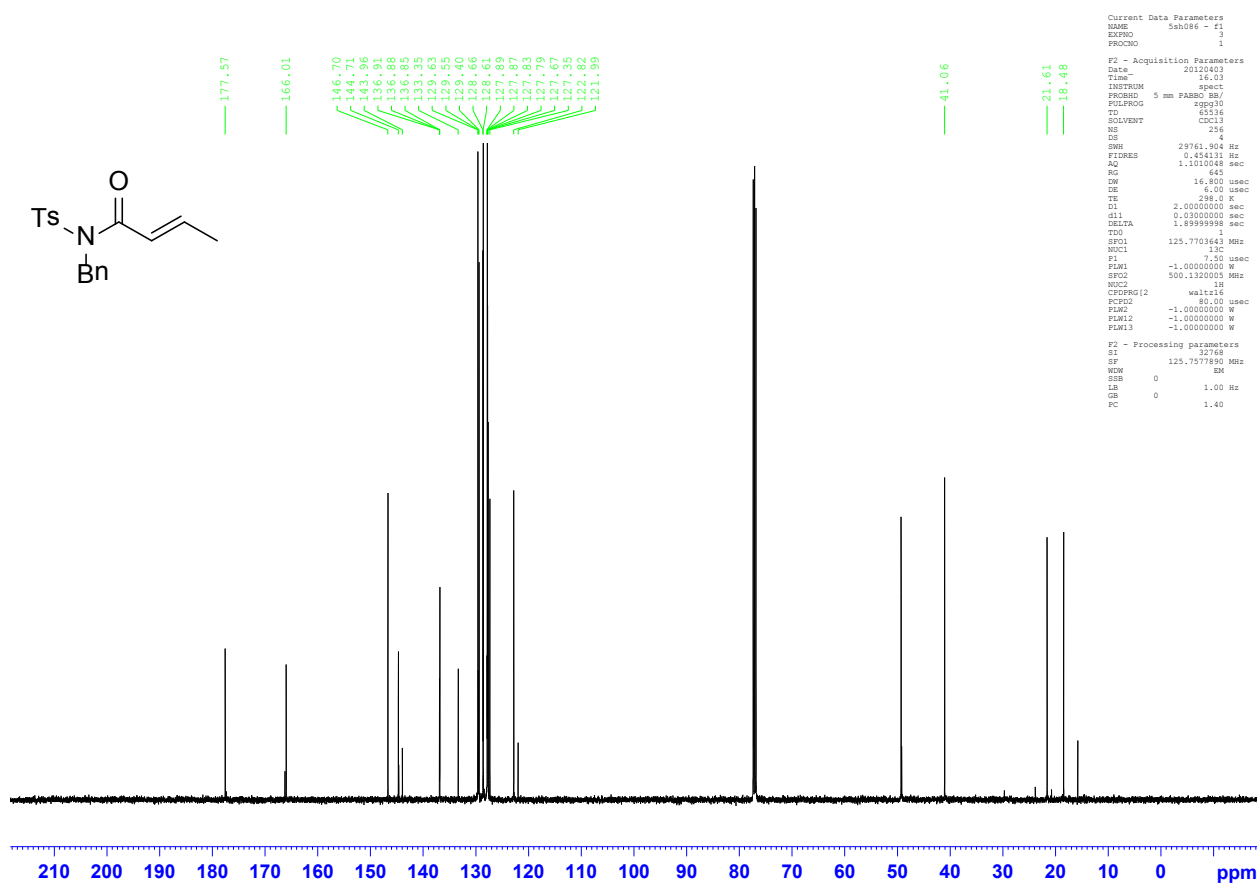

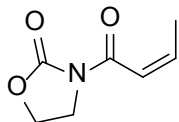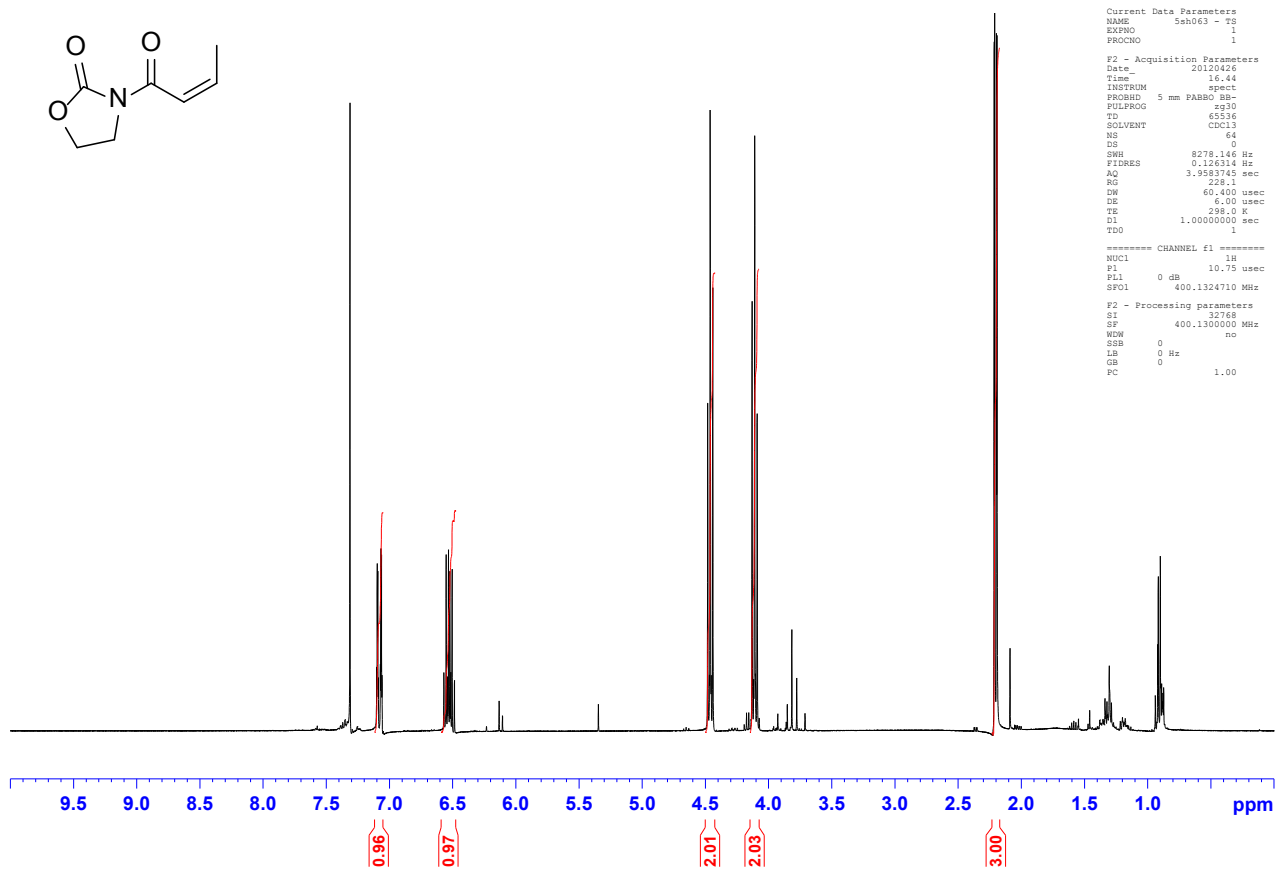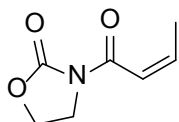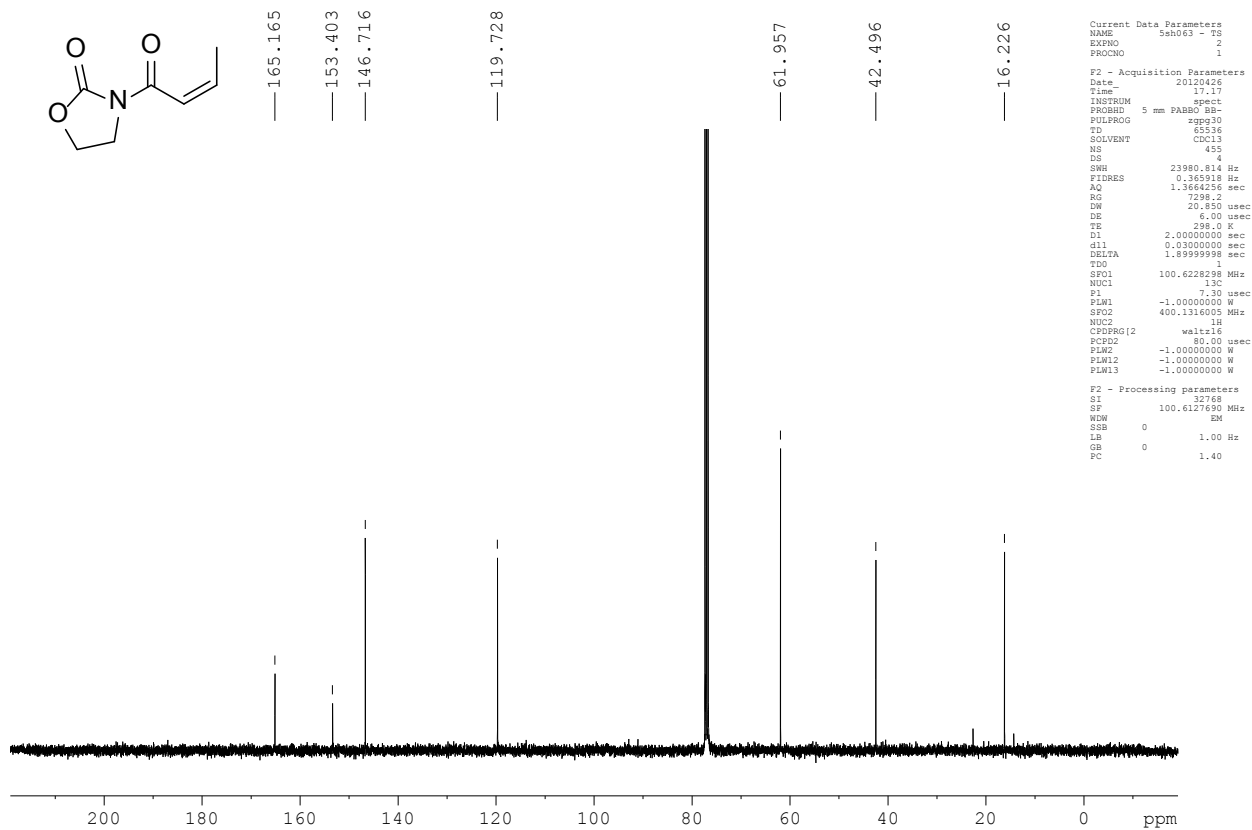

## References

- (1) D. Grée, V. Madiot and R. Grée, *Tetrahedron Lett.* 1999, **40**, 6399.
- (2) M. Barbazanges, C. Meyer, J. Cossy, *Org. Lett.* 2007, **9**, 3245.
- (3) M. O. Frederick, J. A. Mulder, M. R. Tracey, R. P. Hsung, J. Huang, K. C. M Kurtz, L. Shen and C. J., Douglas, *J. Am. Chem. Soc.* 2003, **125**, 2368.
- (4) Sheppard, G. S.; Wang, J.; Kawai, M.; Fidanze, S. D.; BaMaung, N. Y.; Erickson, S. A.; Barnes, D. M.; Tedrow, J. S.; Kolaczowski, L.; Vasudevan, A.; Park, D. C.; Wang, G. T.; Sanders, W. J.; Mantei, R. A.; Palazzo, F.; Tucker-Garcia, L.; Lou, P.; Zhang, Q.; Park, C. H.; Kim, K. H.; Petros, A.; Olejniczak, E.; Nettesheim, D.; Hajduk, P.; Henkin, J.; Lesniewski, R.; Davidsen, S. K. and Bell, R. L., *J. Med. Chem.* 2006, **49**, 3832.
